# Supplementary material for: Beyond detection: Unveiling microbial dynamics in oak seedlings using isolation and high-throughput amplicon sequencing
Source: Research Square preprint supplement (doi:10.21203/rs.3.rs-7760938/v1), 2025-12-22
Supplement: Supplementary file 1 [file 8d96a4feee492eca4368e287.xlsx]

## Sheet: S1
	Locality - sampling site				Climatic conditions				Organic soil parameters							Inorganic soil parameters
	Forest Nursery	GPS	Code	Plant part	Altitudes (m)	Temperature avg (°C)	Precipitaiton (mm)	Soil Type	Cox (%)	HS (%)	HA (%)	FA (%)	HA/FA	DH (%)	Q4/6	pH/CaCl2	P mg /kg	K mg /kg	Ca mg/kg	Mg mg/kg
	N1	49.8159317N, 17.2012250E	N1B	Base	590	6.5	750	Loamy soil	2.175	0.5435	0.2475	0.297	0.8465	11.483	6.993	6.95	163.2	187.6	5390	173.4
			N1S	Stem
	N2	49.5368700N, 17.3117400E	N2B	Base	260	8	600	Loamy soil	2.22	0.5945	0.255	0.3405	0.7485	7.697	7.044	6.86	181.7	464.5	6155	567.5
			N2S	Stem
	N3	48.8175681N, 14.9459272E	N3B	Base	474	7	600	Sandy loam soil	2.97	1.4375	0.677	0.761	0.8915	18.196	5.746	6.06	112.1	267.3	3564	212.6
			N3S	Stem
	N4	48.9143172N, 15.9296406E	N4B	Base	391	9	550	Loamy soil	2.80125	0.8405	0.3975	0.444	0.8965	14.173	6.779	6.83	76.7	241.1	6814	306.1
			N4S	Stem
	N5	49.6077514N, 16.7167122E	N5B	Base	390	7	700	Sandy loam soil	3.72	0.8705	0.422	0.449	0.9395	20.5655	5.771	5.56	87.5	112.1	2374	151.1
			N5S	Stem
	N6	49.3218225N, 16.2383442E	N6B	Base	503	6.5	700	Sandy soil	2.97	0.5195	0.25	0.2695	0.9325	10.2185	6.914	5.47	115.9	149.8	1850	163.3
			N6S	Stem
	N7	48.9749733N, 16.1258161E	N7B	Base	338	9	550	Loamy soil	2.445	0.5465	0.2495	0.2975	0.839	8.1	6.843	5.23	61.9	209.3	1392	149.7
			N7S	Stem
	*Climatic values represent long-term averages for the period 1981–2010. Organic and inorganic soil parameters were measured from pooled samples per nursery. Cox (oxidizable carbon), HSs (%) (humine substances), HAs (%) (humic acids), FAs (%) (fulvic acids), HA/FA ratio, DH (%) (degree of humification), Q4/6 (colour quotient)
	Supplementary Table 1 Site characteristics and soil properties of the studied forest nurseries Geographic coordinates, altitude, long-term climatic conditions (average temperature and annual precipitation for the period 1981–2010 (https://www.chmi.cz/historicka-data/pocasi/mapy-charakteristik-klimatu), soil type, and measured soil parameters are provided for each sampling site. Soil data include …

## Sheet: S11
	Sample group	HTS Avr.	Isolates Avr.	HTS std.	Isolates std.	Mann-Whitney p-value	F-statistic
	All	3.021876	2.142221	0.621177	0.51758	0.000522	16.57231
	Base	2.898686	2.178119	0.643033	0.553408	0.017483	5.049692
	Stem	3.145065	2.106324	0.6222	0.520595	0.011072	11.4759
	Supplementary Table 10 Shannon diversity index in HTAS vs. isolation for all nurseries and plant organs: All, Base, and Stem.

## Sheet: S16
	Mann–Whitney U test p-values Bacteria HTS
	Comparison	Shannon_p	Simpson_p	Chao1_p
	(N1, N2)	0.666667	0.666667	1.000000
	(N1, N3)	1.000000	0.666667	0.414216
	(N1, N4)	0.666667	0.333333	0.333333
	(N1, N5)	1.000000	1.000000	0.333333
	(N1, N6)	1.000000	1.000000	1.000000
	(N1, N7)	0.333333	0.333333	0.333333
	(N2, N3)	1.000000	0.333333	1.000000
	(N2, N4)	1.000000	0.666667	1.000000
	(N2, N6)	1.000000	1.000000	0.666667
	(N2, N7)	0.333333	0.333333	1.000000
	(N3, N6)	1.000000	1.000000	0.666667
	(N3, N7)	0.333333	0.666667	0.414216
	(N4, N3)	1.000000	0.333333	1.000000
	(N4, N6)	1.000000	1.000000	0.666667
	(N4, N7)	0.333333	0.333333	0.333333
	(N5, N2)	1.000000	1.000000	1.000000
	(N5, N3)	0.666667	1.000000	0.666667
	(N5, N4)	1.000000	1.000000	0.666667
	(N5, N6)	1.000000	1.000000	0.666667
	(N5, N7)	0.333333	0.666667	0.666667
	(N7, N6)	1.000000	1.000000	0.333333
	Base vs. Stem	0.011072	0.017483	0.405200
	Combined	0.999998	0.999998	0.999998
	Supplementary Table 16 Pairwise p-values from non-parametric Mann–Whitney U tests comparing alpha diversity metrics (Shannon, Simpson, Chao1) between sampling locations and between plant organs (Base vs. Stem) in bacterial communities. Combined p-values were calculated using Fisher’s method.

## Sheet: S15
	Mann–Whitney U test p-values Fungi HTAS
	Comparison	Shannon_p	Simpson_p	Chao1_p
	N1 vs. N2	1.000000	1.000000	1.000000
	N1 vs. N3	1.000000	0.333333	0.333333
	N1 vs. N4	1.000000	1.000000	1.000000
	N1 vs. N5	1.000000	1.000000	0.666667
	N1 vs. N6	1.000000	0.666667	1.000000
	N1 vs. N7	1.000000	1.000000	0.666667
	N2 vs. N3	1.000000	0.333333	0.333333
	N2 vs. N4	0.333333	0.333333	1.000000
	N2 vs. N6	1.000000	0.333333	1.000000
	N2 vs. N7	0.666667	1.000000	1.000000
	N3 vs. N6	1.000000	1.000000	0.333333
	N3 vs. N7	0.666667	0.333333	0.333333
	N4 vs. N3	0.333333	0.333333	0.333333
	N4 vs. N6	0.333333	0.333333	0.666667
	N4 vs. N7	0.333333	0.333333	0.333333
	N5 vs. N2	1.000000	0.666667	0.666667
	N5 vs. N3	1.000000	0.333333	0.666667
	N5 vs. N4	0.333333	0.333333	0.333333
	N5 vs. N6	0.666667	0.666667	0.666667
	N5 vs. N7	0.333333	0.666667	1.000000
	N7 vs. N6	0.666667	0.666667	0.333333
	Base vs. Stem	0.317599	0.901515	0.128205
	Combined	0.999996	0.999996	0.999996
	Supplementary Table 15 Pairwise p-values from non-parametric Mann–Whitney U tests comparing alpha diversity metrics (Shannon, Simpson, Chao1) between sampling locations and between plant organs (Base vs. Stem) in fungal communities. Combined p-values were calculated using Fisher’s method.

## Sheet: S19
	Test	Metric	FUNGI	BACTERIA
	PERMANOVA Bray-Curtis	F	1.95	1.79
		p-value	0.002	0.015
	PERMANOVA Jaccard	F	1.9	1.73
		p-value	0.001	0.014
	ANOSIM Bray-Curtis	R	0.585	0.327
		p-value	0.003	0.004
	ANOSIM Jaccard	R	0.782	0.367
		p-value	0.002	0.011
	Supplementary Table 19 Summary of beta diversity statistical tests (PERMANOVA and ANOSIM) comparing fungal and bacterial communities across sampling locations. Tests were performed using Bray–Curtis and Jaccard distance metrics. Reported values include F-statistics (PERMANOVA), R-statistics (ANOSIM), and associated p-values.

## Sheet: S27
	Group 1	Group 2	Spearman rho	p-value
	Pathotroph	Pathotroph-Pathotroph-Saprotroph	0.59	<0.001
	Pathotroph-Saprotroph	Pathotroph-Saprotroph-Symbiotroph	0.66	<0.001
	Saprotroph-Symbiotroph	Symbiotroph	0.53	0.018
	Pathotroph-Pathotroph-Saprotroph-Symbiotroph	Symbiotroph	-0.55	0.020
	Pathotroph-Saprotroph-Symbiotroph	Unassigned	-0.71	0.003
	Pathotroph-Symbiotroph	Saprotroph	-0.7	0.002
	Supplementary Table 27 Significant pairwise Spearman correlations between fungal trophic modes based on raw abundance data. Only associations with |ρ| > 0.5 and p < 0.05 are shown. Positive correlations suggest potential co-occurrence or similar ecological responses, while negative correlations may indicate niche partitioning or competitive exclusion.

## Sheet: S31
	Domain	Type	No. of Interactions	Positive	Negative	p < 0.05
	Fungi	Organic	160	66	94	11
	Fungi	Inorganic	100	62	38	15
	Bacteria	Organic	120	24	96	24
	Bacteria	Inorganic	101	78	23	23
	Supplementary Table 31 Summary of significant correlations between the 20 most abundant fungal and bacterial genera and soil properties. The number of genus–parameter interactions is broken down by domain (fungi vs. bacteria), soil fraction (organic vs. inorganic), and direction (positive vs. negative). Organic variables yielded more total interactions and a higher proportion of negative correlat…

## Sheet: S32
	Domain T20	Domain T20	No. of Interactions	Positive	Negative	p < 0.05
	Bakterie	Fungi	225	180	45	12
	Bakterie	Bakterie	190	169	21	134
	Fungi	Fungi	190	145	45	64
	Supplementary Table 32 Total number of significant co-occurrence interactions among the top 20 most abundant fungal and bacterial genera (T20 networks). The table summarizes intra- and inter-kingdom associations, subdivided into positive and negative correlations based on Spearman's rank.

## Sheet: S33
source	target	correlation	pval	interaction_type
Absidia	cox_(%)	0.0	1.0	Negative
Absidia	humus_(%)	0.0	1.0	Negative
Absidia	hl_(%)	0.13867504905630731	0.6363604104741059	Positive
Absidia	hk_(%)	0.13867504905630731	0.6363604104741059	Positive
Absidia	fk_(%)	0.13867504905630731	0.6363604104741059	Positive
Absidia	hk/fk	0.13867504905630731	0.6363604104741059	Positive
Absidia	sh_(%)	0.13867504905630731	0.6363604104741059	Positive
Absidia	q4/6	-0.13867504905630731	0.6363604104741059	Negative
Absidia	ph_cacl2	0.13867504905630731	0.6363604104741059	Positive
Absidia	p_mg_per_kg	-0.27735009811261463	0.3370490579535843	Negative
Absidia	k_mg_per_kg	0.13867504905630731	0.6363604104741059	Positive
Absidia	ca_mg_per_kg	0.41602514716892186	0.13899442751587587	Positive
Absidia	mg_mg_per_kg	0.27735009811261463	0.3370490579535843	Positive
Absidia	ph_cacl2_status	-0.29351975428213717	0.3084311092607553	Negative
Absidia	p_mg_per_kg_status	-0.07337993857053429	0.8031294212066562	Negative
Absidia	k_mg_per_kg_status	-0.2401922307076307	0.4081582068554265	Negative
Absidia	ca_mg_per_kg_status	-0.3668996928526714	0.1969139218336417	Negative
Absidia	mg_mg_per_kg_status	0.1729581738875903	0.5543200094038623	Positive
Acarospora	cox_(%)	-0.13291083197466771	0.6505775840515278	Negative
Acarospora	humus_(%)	-0.13291083197466771	0.6505775840515278	Negative
Acarospora	hl_(%)	-0.4020889149890538	0.1540964457489291	Negative
Acarospora	hk_(%)	-0.39284549165597216	0.16468768767195818	Negative
Acarospora	fk_(%)	-0.4020889149890538	0.1540964457489291	Negative
Acarospora	hk/fk	-0.12478621499660292	0.6708046267379055	Negative
Acarospora	sh_(%)	-0.3235198166578594	0.2591832721725056	Negative
Acarospora	q4/6	0.3235198166578594	0.2591832721725056	Positive
Acarospora	ph_cacl2	0.11092107999698037	0.7058002735643998	Positive
Acarospora	p_mg_per_kg	-0.12016450333006205	0.6824050371013934	Negative
Acarospora	k_mg_per_kg	0.08781252166427612	0.7653156473280641	Positive
Acarospora	ca_mg_per_kg	0.25881585332628754	0.371602417782242	Positive
Acarospora	mg_mg_per_kg	0.16638161999547052	0.569703538801337	Positive
Acarospora	ph_cacl2_status	-0.59427592547409	0.025017340085539304	Negative
Acarospora	p_mg_per_kg_status	-0.3595002512127211	0.20678825761548247	Negative
Acarospora	k_mg_per_kg_status	-0.13074897726491547	0.6559386230579762	Negative
Acarospora	ca_mg_per_kg_status	-0.37906489073450184	0.1813418906663559	Negative
Acarospora	mg_mg_per_kg_status	-0.04611429759107164	0.8756084623681397	Negative
Acarosporina	cox_(%)	-0.41979015736886477	0.13509086839354473	Negative
Acarosporina	humus_(%)	-0.41979015736886477	0.13509086839354473	Negative
Acarosporina	hl_(%)	-0.27735009811261463	0.3370490579535843	Negative
Acarosporina	hk_(%)	-0.41602514716892186	0.13899442751587587	Negative
Acarosporina	fk_(%)	-0.27735009811261463	0.3370490579535843	Negative
Acarosporina	hk/fk	-0.13867504905630731	0.6363604104741059	Negative
Acarosporina	sh_(%)	0.0	1.0	Negative
Acarosporina	q4/6	0.27735009811261463	0.3370490579535843	Positive
Acarosporina	ph_cacl2	0.41602514716892186	0.13899442751587587	Positive
Acarosporina	p_mg_per_kg	0.27735009811261463	0.3370490579535843	Positive
Acarosporina	k_mg_per_kg	-0.13867504905630731	0.6363604104741059	Negative
Acarosporina	ca_mg_per_kg	0.13867504905630731	0.6363604104741059	Positive
Acarosporina	mg_mg_per_kg	0.0	1.0	Negative
Acarosporina	ph_cacl2_status	-0.29351975428213717	0.3084311092607553	Negative
Acarosporina	p_mg_per_kg_status	-0.3668996928526714	0.1969139218336417	Negative
Acarosporina	k_mg_per_kg_status	0.32025630761017426	0.2642960660107213	Positive
Acarosporina	ca_mg_per_kg_status	0.3668996928526714	0.1969139218336417	Positive
Acarosporina	mg_mg_per_kg_status	0.1729581738875903	0.5543200094038623	Positive
Acaulospora	cox_(%)	-0.41979015736886477	0.13509086839354473	Negative
Acaulospora	humus_(%)	-0.41979015736886477	0.13509086839354473	Negative
Acaulospora	hl_(%)	-0.27735009811261463	0.3370490579535843	Negative
Acaulospora	hk_(%)	-0.41602514716892186	0.13899442751587587	Negative
Acaulospora	fk_(%)	-0.27735009811261463	0.3370490579535843	Negative
Acaulospora	hk/fk	-0.13867504905630731	0.6363604104741059	Negative
Acaulospora	sh_(%)	0.0	1.0	Negative
Acaulospora	q4/6	0.27735009811261463	0.3370490579535843	Positive
Acaulospora	ph_cacl2	0.41602514716892186	0.13899442751587587	Positive
Acaulospora	p_mg_per_kg	0.27735009811261463	0.3370490579535843	Positive
Acaulospora	k_mg_per_kg	-0.13867504905630731	0.6363604104741059	Negative
Acaulospora	ca_mg_per_kg	0.13867504905630731	0.6363604104741059	Positive
Acaulospora	mg_mg_per_kg	0.0	1.0	Negative
Acaulospora	ph_cacl2_status	-0.29351975428213717	0.3084311092607553	Negative
Acaulospora	p_mg_per_kg_status	-0.3668996928526714	0.1969139218336417	Negative
Acaulospora	k_mg_per_kg_status	0.32025630761017426	0.2642960660107213	Positive
Acaulospora	ca_mg_per_kg_status	0.3668996928526714	0.1969139218336417	Positive
Acaulospora	mg_mg_per_kg_status	0.1729581738875903	0.5543200094038623	Positive
Acephala	cox_(%)	0.3978212390782301	0.15892899268890612	Positive
Acephala	humus_(%)	0.3978212390782301	0.15892899268890612	Positive
Acephala	hl_(%)	0.08859623899229177	0.7632753546569238	Positive
Acephala	hk_(%)	0.12403473458920848	0.6726862732575218	Positive
Acephala	fk_(%)	0.08859623899229177	0.7632753546569238	Positive
Acephala	hk/fk	-0.23035022137995856	0.42819904902133055	Negative
Acephala	sh_(%)	-0.11517511068997928	0.6950018359855541	Negative
Acephala	q4/6	-0.008859623899229176	0.9760198584759541	Negative
Acephala	ph_cacl2	0.23920984527918776	0.4101364601534573	Positive
Acephala	p_mg_per_kg	0.10631548679075012	0.7175493607091796	Positive
Acephala	k_mg_per_kg	0.5315774339537506	0.05042846141921588	Positive
Acephala	ca_mg_per_kg	0.36324457986839626	0.20175335681438203	Positive
Acephala	mg_mg_per_kg	0.4961389383568339	0.07116738472555156	Positive
Acephala	ph_cacl2_status	-0.23909168777863266	0.41037472959663657	Negative
Acephala	p_mg_per_kg_status	-0.11251373542523889	0.7017513230911439	Negative
Acephala	k_mg_per_kg_status	-0.4296689244236597	0.12519998876847233	Negative
Acephala	ca_mg_per_kg_status	-0.04688072309384954	0.8735560564125584	Negative
Acephala	mg_mg_per_kg_status	0.011049892402196598	0.9700936822466092	Positive
Acericola	cox_(%)	-0.18702535404432774	0.5220232330161205	Negative
Acericola	humus_(%)	-0.18702535404432774	0.5220232330161205	Negative
Acericola	hl_(%)	-0.21805642673609268	0.45391306826013034	Negative
Acericola	hk_(%)	-0.32708464010413896	0.2536669175434305	Negative
Acericola	fk_(%)	-0.21805642673609268	0.45391306826013034	Negative
Acericola	hk/fk	-0.3925015681249668	0.1650906948933765	Negative
Acericola	sh_(%)	-0.2834733547569205	0.3260427414573789	Negative
Acericola	q4/6	0.5015297814930132	0.06767729848047004	Positive
Acericola	ph_cacl2	0.5160668766087526	0.05887657004242199	Positive
Acericola	p_mg_per_kg	0.5015297814930132	0.06767729848047004	Positive
Acericola	k_mg_per_kg	0.17444514138887413	0.5508664460004657	Positive
Acericola	ca_mg_per_kg	0.29801044987266	0.30073936099636894	Positive
Acericola	mg_mg_per_kg	0.2834733547569205	0.3260427414573789	Positive
Acericola	ph_cacl2_status	-0.43076923076923085	0.12412955584045603	Negative
Acericola	p_mg_per_kg_status	-0.5384615384615384	0.04697614585955521	Negative
Acericola	k_mg_per_kg_status	0.0881264556722277	0.7644981957524002	Positive
Acericola	ca_mg_per_kg_status	0.038461538461538464	0.8961396559649237	Positive
Acericola	mg_mg_per_kg_status	-0.2175713172881685	0.4549429517753415	Negative
Achroiostachys	cox_(%)	0.0	1.0	Negative
Achroiostachys	humus_(%)	0.0	1.0	Negative
Achroiostachys	hl_(%)	0.10206207261596577	0.7284518849717143	Positive
Achroiostachys	hk_(%)	0.0	1.0	Negative
Achroiostachys	fk_(%)	0.10206207261596577	0.7284518849717143	Positive
Achroiostachys	hk/fk	-0.10206207261596577	0.7284518849717143	Negative
Achroiostachys	sh_(%)	0.20412414523193154	0.4839400434753175	Positive
Achroiostachys	q4/6	-0.10206207261596577	0.7284518849717143	Negative
Achroiostachys	ph_cacl2	0.30618621784789724	0.28702393496270867	Positive
Achroiostachys	p_mg_per_kg	0.20412414523193154	0.4839400434753175	Positive
Achroiostachys	k_mg_per_kg	0.10206207261596577	0.7284518849717143	Positive
Achroiostachys	ca_mg_per_kg	0.10206207261596577	0.7284518849717143	Positive
Achroiostachys	mg_mg_per_kg	0.10206207261596577	0.7284518849717143	Positive
Achroiostachys	ph_cacl2_status	0.054006172486732174	0.8545117981204091	Positive
Achroiostachys	p_mg_per_kg_status	-0.054006172486732174	0.8545117981204091	Negative
Achroiostachys	k_mg_per_kg_status	0.05892556509887896	0.8414059267318383	Positive
Achroiostachys	ca_mg_per_kg_status	0.5400617248673216	0.0461990055142095	Positive
Achroiostachys	mg_mg_per_kg_status	0.2545875386086578	0.3797426309998979	Positive
Acremonium	cox_(%)	0.23737874021014627	0.41383697035172273	Positive
Acremonium	humus_(%)	0.23737874021014627	0.41383697035172273	Positive
Acremonium	hl_(%)	0.036192267675858036	0.9022399539741801	Positive
Acremonium	hk_(%)	-0.1137471269812681	0.6986207558579037	Negative
Acremonium	fk_(%)	0.036192267675858036	0.9022399539741801	Positive
Acremonium	hk/fk	-0.30504911326794626	0.2889091766681475	Negative
Acremonium	sh_(%)	-0.30504911326794626	0.2889091766681475	Negative
Acremonium	q4/6	0.06204388744432805	0.8331178478513483	Positive
Acremonium	ph_cacl2	-0.2688568455920882	0.3526533396083251	Negative
Acremonium	p_mg_per_kg	-0.40328526838813233	0.1527593379259671	Negative
Acremonium	k_mg_per_kg	0.14993939465712613	0.6089142053905728	Positive
Acremonium	ca_mg_per_kg	-0.1240877748886561	0.6725534060485479	Negative
Acremonium	mg_mg_per_kg	-0.17062069047190215	0.559767453225952	Negative
Acremonium	ph_cacl2_status	-0.09849161792962488	0.7376409009922928	Negative
Acremonium	p_mg_per_kg_status	-0.21613438379001018	0.45800024347894497	Negative
Acremonium	k_mg_per_kg_status	-0.3970166942195529	0.15985104181250284	Negative
Acremonium	ca_mg_per_kg_status	-0.410381741373437	0.14498544052478649	Negative
Acremonium	mg_mg_per_kg_status	-0.5223306819605423	0.05535082160889845	Negative
Acroscyphus	cox_(%)	0.20989507868443238	0.4713904819118111	Positive
Acroscyphus	humus_(%)	0.20989507868443238	0.4713904819118111	Positive
Acroscyphus	hl_(%)	-0.13867504905630731	0.6363604104741059	Negative
Acroscyphus	hk_(%)	-0.27735009811261463	0.3370490579535843	Negative
Acroscyphus	fk_(%)	-0.13867504905630731	0.6363604104741059	Negative
Acroscyphus	hk/fk	-0.27735009811261463	0.3370490579535843	Negative
Acroscyphus	sh_(%)	-0.27735009811261463	0.3370490579535843	Negative
Acroscyphus	q4/6	0.0	1.0	Negative
Acroscyphus	ph_cacl2	-0.41602514716892186	0.13899442751587587	Negative
Acroscyphus	p_mg_per_kg	-0.41602514716892186	0.13899442751587587	Negative
Acroscyphus	k_mg_per_kg	0.0	1.0	Negative
Acroscyphus	ca_mg_per_kg	-0.41602514716892186	0.13899442751587587	Negative
Acroscyphus	mg_mg_per_kg	-0.41602514716892186	0.13899442751587587	Negative
Acroscyphus	ph_cacl2_status	0.07337993857053429	0.8031294212066562	Positive
Acroscyphus	p_mg_per_kg_status	-0.07337993857053429	0.8031294212066562	Negative
Acroscyphus	k_mg_per_kg_status	-0.2401922307076307	0.4081582068554265	Negative
Acroscyphus	ca_mg_per_kg_status	0.0	1.0	Negative
Acroscyphus	mg_mg_per_kg_status	-0.3459163477751806	0.22571361240397014	Negative
Aequabiliella	cox_(%)	0.0	1.0	Negative
Aequabiliella	humus_(%)	0.0	1.0	Negative
Aequabiliella	hl_(%)	0.20351933162035318	0.4852643156885843	Positive
Aequabiliella	hk_(%)	0.20351933162035318	0.4852643156885843	Positive
Aequabiliella	fk_(%)	0.20351933162035318	0.4852643156885843	Positive
Aequabiliella	hk/fk	0.20351933162035318	0.4852643156885843	Positive
Aequabiliella	sh_(%)	0.20351933162035318	0.4852643156885843	Positive
Aequabiliella	q4/6	-0.20351933162035318	0.4852643156885843	Negative
Aequabiliella	ph_cacl2	0.20351933162035318	0.4852643156885843	Positive
Aequabiliella	p_mg_per_kg	-0.40703866324070637	0.1486141440865914	Negative
Aequabiliella	k_mg_per_kg	0.20351933162035318	0.4852643156885843	Positive
Aequabiliella	ca_mg_per_kg	0.6105579948610594	0.02038833655949962	Positive
Aequabiliella	mg_mg_per_kg	0.40703866324070637	0.1486141440865914	Positive
Aequabiliella	ph_cacl2_status	-0.43076923076923085	0.12412955584045603	Negative
Aequabiliella	p_mg_per_kg_status	-0.10769230769230771	0.714030808726249	Negative
Aequabiliella	k_mg_per_kg_status	-0.3525058226889108	0.21640370611157558	Negative
Aequabiliella	ca_mg_per_kg_status	-0.5384615384615384	0.04697614585955521	Negative
Aequabiliella	mg_mg_per_kg_status	0.25383320350286326	0.38120477846764866	Positive
Agaricus	cox_(%)	-0.018609684207969417	0.9496520688467486	Negative
Agaricus	humus_(%)	-0.018609684207969417	0.9496520688467486	Negative
Agaricus	hl_(%)	0.225924028528766	0.43737089107202476	Positive
Agaricus	hk_(%)	0.05071763905747808	0.8632925510701744	Positive
Agaricus	fk_(%)	0.225924028528766	0.43737089107202476	Positive
Agaricus	hk/fk	-0.3227486121839514	0.2603860768539077	Negative
Agaricus	sh_(%)	0.1475422227126635	0.6147166486604247	Positive
Agaricus	q4/6	0.1060459725747269	0.7182387331947204	Positive
Agaricus	ph_cacl2	0.7284897246437761	0.0031274345512466877	Positive
Agaricus	p_mg_per_kg	0.5671154185518004	0.03443486736833478	Positive
Agaricus	k_mg_per_kg	0.33197000110349284	0.2462233425787623	Positive
Agaricus	ca_mg_per_kg	0.4426266681379905	0.11298543140578268	Positive
Agaricus	mg_mg_per_kg	0.4426266681379905	0.11298543140578268	Positive
Agaricus	ph_cacl2_status	-0.1488247611246513	0.6116095849753103	Negative
Agaricus	p_mg_per_kg_status	-0.35376377644384327	0.21465413239114414	Negative
Agaricus	k_mg_per_kg_status	0.018633899812498248	0.9495866300281662	Positive
Agaricus	ca_mg_per_kg_status	0.47575128556240986	0.08552448738860749	Positive
Agaricus	mg_mg_per_kg_status	0.09200874124564722	0.7544082000536367	Positive
Alanphillipsia	cox_(%)	0.1492728992570695	0.6105253566180715	Positive
Alanphillipsia	humus_(%)	0.1492728992570695	0.6105253566180715	Positive
Alanphillipsia	hl_(%)	0.06163920909019225	0.8341925367574063	Positive
Alanphillipsia	hk_(%)	-0.036983525454115346	0.9001122935874064	Negative
Alanphillipsia	fk_(%)	0.06163920909019225	0.8341925367574063	Positive
Alanphillipsia	hk/fk	-0.036983525454115346	0.9001122935874064	Negative
Alanphillipsia	sh_(%)	-0.036983525454115346	0.9001122935874064	Negative
Alanphillipsia	q4/6	-0.16026194363449983	0.5841748506229724	Negative
Alanphillipsia	ph_cacl2	-0.13560625999842293	0.6439153293357192	Negative
Alanphillipsia	p_mg_per_kg	-0.6163920909019225	0.018898277068423053	Negative
Alanphillipsia	k_mg_per_kg	0.16026194363449983	0.5841748506229724	Positive
Alanphillipsia	ca_mg_per_kg	0.18491762727057676	0.526808170961694	Positive
Alanphillipsia	mg_mg_per_kg	0.0246556836360769	0.9333238674012627	Positive
Alanphillipsia	ph_cacl2_status	-0.28702435214351457	0.319754150785301	Negative
Alanphillipsia	p_mg_per_kg_status	-0.13698889534122285	0.6405074695579516	Negative
Alanphillipsia	k_mg_per_kg_status	-0.4484014159068123	0.10781415190693584	Negative
Alanphillipsia	ca_mg_per_kg_status	-0.4240132474847374	0.1308006162532752	Negative
Alanphillipsia	mg_mg_per_kg_status	-0.04612656040144426	0.8755756181115336	Negative
Alatosessilispora	cox_(%)	-0.0621970413571123	0.8327111933875557	Negative
Alatosessilispora	humus_(%)	-0.0621970413571123	0.8327111933875557	Negative
Alatosessilispora	hl_(%)	-0.18491762727057676	0.526808170961694	Negative
Alatosessilispora	hk_(%)	-0.06163920909019225	0.8341925367574063	Negative
Alatosessilispora	fk_(%)	-0.18491762727057676	0.526808170961694	Negative
Alatosessilispora	hk/fk	0.1232784181803845	0.6745818280790026	Positive
Alatosessilispora	sh_(%)	0.07396705090823069	0.8015827570166417	Positive
Alatosessilispora	q4/6	-0.01232784181803845	0.966636598262443	Negative
Alatosessilispora	ph_cacl2	0.0246556836360769	0.9333238674012627	Positive
Alatosessilispora	p_mg_per_kg	0.246556836360769	0.39546195538384565	Positive
Alatosessilispora	k_mg_per_kg	-0.0986227345443076	0.7373028709888905	Negative
Alatosessilispora	ca_mg_per_kg	-0.1232784181803845	0.6745818280790026	Negative
Alatosessilispora	mg_mg_per_kg	-0.01232784181803845	0.966636598262443	Negative
Alatosessilispora	ph_cacl2_status	0.12394233388015403	0.6729177604296294	Positive
Alatosessilispora	p_mg_per_kg_status	0.19569842191603268	0.5025406862736179	Positive
Alatosessilispora	k_mg_per_kg_status	0.24911189772600684	0.39042409475503626	Positive
Alatosessilispora	ca_mg_per_kg_status	0.4240132474847374	0.1308006162532752	Positive
Alatosessilispora	mg_mg_per_kg_status	0.3228859228101098	0.260171676217085	Positive
Alatospora	cox_(%)	0.13061378684993583	0.6562743879450084	Positive
Alatospora	humus_(%)	0.13061378684993583	0.6562743879450084	Positive
Alatospora	hl_(%)	0.08629489272626915	0.769270584862031	Positive
Alatospora	hk_(%)	0.0	1.0	Negative
Alatospora	fk_(%)	0.08629489272626915	0.769270584862031	Positive
Alatospora	hk/fk	0.0	1.0	Negative
Alatospora	sh_(%)	0.0	1.0	Negative
Alatospora	q4/6	-0.1725897854525383	0.5551770310276576	Negative
Alatospora	ph_cacl2	-0.08629489272626915	0.769270584862031	Negative
Alatospora	p_mg_per_kg	-0.6040642490838841	0.022149402958339955	Negative
Alatospora	k_mg_per_kg	0.1725897854525383	0.5551770310276576	Positive
Alatospora	ca_mg_per_kg	0.2588846781788074	0.3714707017244274	Positive
Alatospora	mg_mg_per_kg	0.08629489272626915	0.769270584862031	Positive
Alatospora	ph_cacl2_status	-0.31964075579618667	0.2652671387836114	Negative
Alatospora	p_mg_per_kg_status	-0.13698889534122285	0.6405074695579516	Negative
Alatospora	k_mg_per_kg_status	-0.4484014159068123	0.10781415190693584	Negative
Alatospora	ca_mg_per_kg_status	-0.45662965113740955	0.10073014079927436	Negative
Alatospora	mg_mg_per_kg_status	0.0	1.0	Negative
Allelochaeta	cox_(%)	0.15819461514694905	0.5890968034267252	Positive
Allelochaeta	humus_(%)	0.15819461514694905	0.5890968034267252	Positive
Allelochaeta	hl_(%)	0.30907229281025106	0.2822714878700138	Positive
Allelochaeta	hk_(%)	0.21948612098119277	0.4508844936723092	Positive
Allelochaeta	fk_(%)	0.30907229281025106	0.2822714878700138	Positive
Allelochaeta	hk/fk	-0.27323782407862773	0.3445555165768177	Negative
Allelochaeta	sh_(%)	0.08062755464615244	0.7840851172451102	Positive
Allelochaeta	q4/6	0.07614824605469953	0.7958426622899155	Positive
Allelochaeta	ph_cacl2	0.7659617691384483	0.0014023075719467749	Positive
Allelochaeta	p_mg_per_kg	0.38522053886495056	0.17377399188250187	Positive
Allelochaeta	k_mg_per_kg	0.5957480426632376	0.024569143730028168	Positive
Allelochaeta	ca_mg_per_kg	0.8017962378700716	0.0005625916720058955	Positive
Allelochaeta	mg_mg_per_kg	0.7928376206871658	0.0007183536169871285	Positive
Allelochaeta	ph_cacl2_status	-0.43612182608877903	0.11901064648872402	Negative
Allelochaeta	p_mg_per_kg_status	-0.3981981890375808	0.15849819303315593	Negative
Allelochaeta	k_mg_per_kg_status	-0.32585238265340166	0.2555656726489172	Negative
Allelochaeta	ca_mg_per_kg_status	-0.047404546313997716	0.8721537379408069	Negative
Allelochaeta	mg_mg_per_kg_status	0.06704015231539909	0.8198723037377759	Positive
Alloleptosphaeria	cox_(%)	-0.12101640555809444	0.6802617844183108	Negative
Alloleptosphaeria	humus_(%)	-0.12101640555809444	0.6802617844183108	Negative
Alloleptosphaeria	hl_(%)	-0.18898223650461363	0.5175981987378706	Negative
Alloleptosphaeria	hk_(%)	-0.2834733547569205	0.3260427414573789	Negative
Alloleptosphaeria	fk_(%)	-0.18898223650461363	0.5175981987378706	Negative
Alloleptosphaeria	hk/fk	-0.42157575835644584	0.13326552083734988	Negative
Alloleptosphaeria	sh_(%)	-0.32708464010413896	0.2536669175434305	Negative
Alloleptosphaeria	q4/6	0.5160668766087526	0.05887657004242199	Positive
Alloleptosphaeria	ph_cacl2	0.5015297814930132	0.06767729848047004	Positive
Alloleptosphaeria	p_mg_per_kg	0.5160668766087526	0.05887657004242199	Positive
Alloleptosphaeria	k_mg_per_kg	0.23259352185183219	0.42358798119959806	Positive
Alloleptosphaeria	ca_mg_per_kg	0.3125475449883995	0.27661075148052977	Positive
Alloleptosphaeria	mg_mg_per_kg	0.32708464010413896	0.2536669175434305	Positive
Alloleptosphaeria	ph_cacl2_status	-0.43076923076923085	0.12412955584045603	Negative
Alloleptosphaeria	p_mg_per_kg_status	-0.5384615384615384	0.04697614585955521	Negative
Alloleptosphaeria	k_mg_per_kg_status	0.0293754852240759	0.9205938912227659	Positive
Alloleptosphaeria	ca_mg_per_kg_status	-0.038461538461538464	0.8961396559649237	Negative
Alloleptosphaeria	mg_mg_per_kg_status	-0.290095089717558	0.3143720668056274	Negative
Allophoma	cox_(%)	-0.41979015736886477	0.13509086839354473	Negative
Allophoma	humus_(%)	-0.41979015736886477	0.13509086839354473	Negative
Allophoma	hl_(%)	-0.27735009811261463	0.3370490579535843	Negative
Allophoma	hk_(%)	-0.41602514716892186	0.13899442751587587	Negative
Allophoma	fk_(%)	-0.27735009811261463	0.3370490579535843	Negative
Allophoma	hk/fk	-0.13867504905630731	0.6363604104741059	Negative
Allophoma	sh_(%)	0.0	1.0	Negative
Allophoma	q4/6	0.27735009811261463	0.3370490579535843	Positive
Allophoma	ph_cacl2	0.41602514716892186	0.13899442751587587	Positive
Allophoma	p_mg_per_kg	0.27735009811261463	0.3370490579535843	Positive
Allophoma	k_mg_per_kg	-0.13867504905630731	0.6363604104741059	Negative
Allophoma	ca_mg_per_kg	0.13867504905630731	0.6363604104741059	Positive
Allophoma	mg_mg_per_kg	0.0	1.0	Negative
Allophoma	ph_cacl2_status	-0.29351975428213717	0.3084311092607553	Negative
Allophoma	p_mg_per_kg_status	-0.3668996928526714	0.1969139218336417	Negative
Allophoma	k_mg_per_kg_status	0.32025630761017426	0.2642960660107213	Positive
Allophoma	ca_mg_per_kg_status	0.3668996928526714	0.1969139218336417	Positive
Allophoma	mg_mg_per_kg_status	0.1729581738875903	0.5543200094038623	Positive
Alnicola	cox_(%)	-0.27366698197129413	0.3437678465846409	Negative
Alnicola	humus_(%)	-0.27366698197129413	0.3437678465846409	Negative
Alnicola	hl_(%)	0.06163920909019225	0.8341925367574063	Positive
Alnicola	hk_(%)	0.20957331090665363	0.47208606905146144	Positive
Alnicola	fk_(%)	0.06163920909019225	0.8341925367574063	Positive
Alnicola	hk/fk	0.5300971981756533	0.051194212922961044	Positive
Alnicola	sh_(%)	0.30819604545096124	0.28370946111247375	Positive
Alnicola	q4/6	-0.20957331090665363	0.47208606905146144	Negative
Alnicola	ph_cacl2	-0.16026194363449983	0.5841748506229724	Negative
Alnicola	p_mg_per_kg	-0.1972454690886152	0.49910103557808105	Negative
Alnicola	k_mg_per_kg	-0.35750741272311504	0.20949994856361015	Negative
Alnicola	ca_mg_per_kg	0.01232784181803845	0.966636598262443	Positive
Alnicola	mg_mg_per_kg	-0.0986227345443076	0.7373028709888905	Negative
Alnicola	ph_cacl2_status	0.11741905314961959	0.6893272451019979	Positive
Alnicola	p_mg_per_kg_status	0.31964075579618667	0.2652671387836114	Positive
Alnicola	k_mg_per_kg_status	0.24911189772600684	0.39042409475503626	Positive
Alnicola	ca_mg_per_kg_status	-0.22831482556870478	0.4324046079302347	Negative
Alnicola	mg_mg_per_kg_status	0.3228859228101098	0.260171676217085	Positive
Alpinaria	cox_(%)	0.20989507868443238	0.4713904819118111	Positive
Alpinaria	humus_(%)	0.20989507868443238	0.4713904819118111	Positive
Alpinaria	hl_(%)	0.0	1.0	Negative
Alpinaria	hk_(%)	0.0	1.0	Negative
Alpinaria	fk_(%)	0.0	1.0	Negative
Alpinaria	hk/fk	-0.41602514716892186	0.13899442751587587	Negative
Alpinaria	sh_(%)	-0.41602514716892186	0.13899442751587587	Negative
Alpinaria	q4/6	0.41602514716892186	0.13899442751587587	Positive
Alpinaria	ph_cacl2	0.27735009811261463	0.3370490579535843	Positive
Alpinaria	p_mg_per_kg	0.41602514716892186	0.13899442751587587	Positive
Alpinaria	k_mg_per_kg	0.41602514716892186	0.13899442751587587	Positive
Alpinaria	ca_mg_per_kg	0.27735009811261463	0.3370490579535843	Positive
Alpinaria	mg_mg_per_kg	0.41602514716892186	0.13899442751587587	Positive
Alpinaria	ph_cacl2_status	-0.29351975428213717	0.3084311092607553	Negative
Alpinaria	p_mg_per_kg_status	-0.3668996928526714	0.1969139218336417	Negative
Alpinaria	k_mg_per_kg_status	-0.2401922307076307	0.4081582068554265	Negative
Alpinaria	ca_mg_per_kg_status	-0.3668996928526714	0.1969139218336417	Negative
Alpinaria	mg_mg_per_kg_status	-0.5188745216627708	0.057276793791090574	Negative
Alternaria	cox_(%)	0.09397125473281323	0.749321377534464	Positive
Alternaria	humus_(%)	0.09397125473281323	0.749321377534464	Positive
Alternaria	hl_(%)	-0.239473147334988	0.4096057577036024	Negative
Alternaria	hk_(%)	-0.5055544221516414	0.06515255526937307	Negative
Alternaria	fk_(%)	-0.239473147334988	0.4096057577036024	Negative
Alternaria	hk/fk	-0.6474644353871898	0.012302153694324164	Negative
Alternaria	sh_(%)	-0.39912191222498	0.1574457554598558	Negative
Alternaria	q4/6	0.35477503308887115	0.2132541039920647	Positive
Alternaria	ph_cacl2	0.3015587781255404	0.29474101188648466	Positive
Alternaria	p_mg_per_kg	0.05321625496333067	0.8566195755836703	Positive
Alternaria	k_mg_per_kg	0.34590565726164935	0.22572891474136073	Positive
Alternaria	ca_mg_per_kg	0.14191001323554844	0.6284318193604354	Positive
Alternaria	mg_mg_per_kg	0.09756313409943956	0.7400358710653134	Positive
Alternaria	ph_cacl2_status	-0.46463002191929276	0.09415725947756007	Negative
Alternaria	p_mg_per_kg_status	-0.628893160981669	0.015984161580092297	Negative
Alternaria	k_mg_per_kg_status	-0.28676124519786533	0.32021771675024896	Negative
Alternaria	ca_mg_per_kg_status	0.14079697633917962	0.6311556213760473	Positive
Alternaria	mg_mg_per_kg_status	-0.32079960060665313	0.263440756428428	Negative
Alternariaster	cox_(%)	-0.41979015736886477	0.13509086839354473	Negative
Alternariaster	humus_(%)	-0.41979015736886477	0.13509086839354473	Negative
Alternariaster	hl_(%)	-0.27735009811261463	0.3370490579535843	Negative
Alternariaster	hk_(%)	-0.41602514716892186	0.13899442751587587	Negative
Alternariaster	fk_(%)	-0.27735009811261463	0.3370490579535843	Negative
Alternariaster	hk/fk	-0.13867504905630731	0.6363604104741059	Negative
Alternariaster	sh_(%)	0.0	1.0	Negative
Alternariaster	q4/6	0.27735009811261463	0.3370490579535843	Positive
Alternariaster	ph_cacl2	0.41602514716892186	0.13899442751587587	Positive
Alternariaster	p_mg_per_kg	0.27735009811261463	0.3370490579535843	Positive
Alternariaster	k_mg_per_kg	-0.13867504905630731	0.6363604104741059	Negative
Alternariaster	ca_mg_per_kg	0.13867504905630731	0.6363604104741059	Positive
Alternariaster	mg_mg_per_kg	0.0	1.0	Negative
Alternariaster	ph_cacl2_status	-0.29351975428213717	0.3084311092607553	Negative
Alternariaster	p_mg_per_kg_status	-0.3668996928526714	0.1969139218336417	Negative
Alternariaster	k_mg_per_kg_status	0.32025630761017426	0.2642960660107213	Positive
Alternariaster	ca_mg_per_kg_status	0.3668996928526714	0.1969139218336417	Positive
Alternariaster	mg_mg_per_kg_status	0.1729581738875903	0.5543200094038623	Positive
Amanita	cox_(%)	-0.057279399409552734	0.8457874312523334	Negative
Amanita	humus_(%)	-0.057279399409552734	0.8457874312523334	Negative
Amanita	hl_(%)	-0.14191418111411186	0.6284216280368272	Negative
Amanita	hk_(%)	-0.3689768708966908	0.19419687468322794	Negative
Amanita	fk_(%)	-0.14191418111411186	0.6284216280368272	Negative
Amanita	hk/fk	-0.6055005060868772	0.021750387432733824	Negative
Amanita	sh_(%)	-0.2743674168206162	0.3424844257177706	Negative
Amanita	q4/6	0.4635863249727654	0.0949973372121478	Positive
Amanita	ph_cacl2	0.6811880693477368	0.007311455810180152	Positive
Amanita	p_mg_per_kg	0.5108910520108026	0.06190958919624309	Positive
Amanita	k_mg_per_kg	0.3784378163042983	0.1821245439765553	Positive
Amanita	ca_mg_per_kg	0.39735970711951313	0.159457503513207	Positive
Amanita	mg_mg_per_kg	0.3784378163042983	0.1821245439765553	Positive
Amanita	ph_cacl2_status	-0.49561991257854127	0.07151002417116172	Negative
Amanita	p_mg_per_kg_status	-0.6858578588208096	0.0067686539159731605	Negative
Amanita	k_mg_per_kg_status	-0.07647191129018725	0.7949917057782385	Negative
Amanita	ca_mg_per_kg_status	0.2503130871608794	0.38806745187504	Positive
Amanita	mg_mg_per_kg_status	-0.2123976976214366	0.465997207276198	Negative
Amauroderma	cox_(%)	0.0	1.0	Negative
Amauroderma	humus_(%)	0.0	1.0	Negative
Amauroderma	hl_(%)	0.13867504905630731	0.6363604104741059	Positive
Amauroderma	hk_(%)	0.13867504905630731	0.6363604104741059	Positive
Amauroderma	fk_(%)	0.13867504905630731	0.6363604104741059	Positive
Amauroderma	hk/fk	0.13867504905630731	0.6363604104741059	Positive
Amauroderma	sh_(%)	0.13867504905630731	0.6363604104741059	Positive
Amauroderma	q4/6	-0.13867504905630731	0.6363604104741059	Negative
Amauroderma	ph_cacl2	0.13867504905630731	0.6363604104741059	Positive
Amauroderma	p_mg_per_kg	-0.27735009811261463	0.3370490579535843	Negative
Amauroderma	k_mg_per_kg	0.13867504905630731	0.6363604104741059	Positive
Amauroderma	ca_mg_per_kg	0.41602514716892186	0.13899442751587587	Positive
Amauroderma	mg_mg_per_kg	0.27735009811261463	0.3370490579535843	Positive
Amauroderma	ph_cacl2_status	-0.29351975428213717	0.3084311092607553	Negative
Amauroderma	p_mg_per_kg_status	-0.07337993857053429	0.8031294212066562	Negative
Amauroderma	k_mg_per_kg_status	-0.2401922307076307	0.4081582068554265	Negative
Amauroderma	ca_mg_per_kg_status	-0.3668996928526714	0.1969139218336417	Negative
Amauroderma	mg_mg_per_kg_status	0.1729581738875903	0.5543200094038623	Positive
Ambrosiozyma	cox_(%)	-0.41979015736886477	0.13509086839354473	Negative
Ambrosiozyma	humus_(%)	-0.41979015736886477	0.13509086839354473	Negative
Ambrosiozyma	hl_(%)	-0.27735009811261463	0.3370490579535843	Negative
Ambrosiozyma	hk_(%)	-0.41602514716892186	0.13899442751587587	Negative
Ambrosiozyma	fk_(%)	-0.27735009811261463	0.3370490579535843	Negative
Ambrosiozyma	hk/fk	-0.13867504905630731	0.6363604104741059	Negative
Ambrosiozyma	sh_(%)	0.0	1.0	Negative
Ambrosiozyma	q4/6	0.27735009811261463	0.3370490579535843	Positive
Ambrosiozyma	ph_cacl2	0.41602514716892186	0.13899442751587587	Positive
Ambrosiozyma	p_mg_per_kg	0.27735009811261463	0.3370490579535843	Positive
Ambrosiozyma	k_mg_per_kg	-0.13867504905630731	0.6363604104741059	Negative
Ambrosiozyma	ca_mg_per_kg	0.13867504905630731	0.6363604104741059	Positive
Ambrosiozyma	mg_mg_per_kg	0.0	1.0	Negative
Ambrosiozyma	ph_cacl2_status	-0.29351975428213717	0.3084311092607553	Negative
Ambrosiozyma	p_mg_per_kg_status	-0.3668996928526714	0.1969139218336417	Negative
Ambrosiozyma	k_mg_per_kg_status	0.32025630761017426	0.2642960660107213	Positive
Ambrosiozyma	ca_mg_per_kg_status	0.3668996928526714	0.1969139218336417	Positive
Ambrosiozyma	mg_mg_per_kg_status	0.1729581738875903	0.5543200094038623	Positive
Ampelomyces	cox_(%)	-0.04400596565748888	0.881258066137161	Negative
Ampelomyces	humus_(%)	-0.04400596565748888	0.881258066137161	Negative
Ampelomyces	hl_(%)	0.0654169280208278	0.8241708918866163	Positive
Ampelomyces	hk_(%)	-0.04361128534721853	0.882316264822782	Negative
Ampelomyces	fk_(%)	0.0654169280208278	0.8241708918866163	Positive
Ampelomyces	hk/fk	-0.10902821336804634	0.7106218591260346	Negative
Ampelomyces	sh_(%)	0.18898223650461363	0.5175981987378706	Positive
Ampelomyces	q4/6	-0.0654169280208278	0.8241708918866163	Negative
Ampelomyces	ph_cacl2	0.32708464010413896	0.2536669175434305	Positive
Ampelomyces	p_mg_per_kg	0.21805642673609268	0.45391306826013034	Positive
Ampelomyces	k_mg_per_kg	0.07995402313656731	0.7858503710438625	Positive
Ampelomyces	ca_mg_per_kg	0.10902821336804634	0.7106218591260346	Positive
Ampelomyces	mg_mg_per_kg	0.09449111825230681	0.7479754712371746	Positive
Ampelomyces	ph_cacl2_status	0.019230769230769232	0.947973779706964	Positive
Ampelomyces	p_mg_per_kg_status	-0.08846153846153847	0.7636259264033068	Negative
Ampelomyces	k_mg_per_kg_status	0.0881264556722277	0.7644981957524002	Positive
Ampelomyces	ca_mg_per_kg_status	0.5384615384615384	0.04697614585955521	Positive
Ampelomyces	mg_mg_per_kg_status	0.25383320350286326	0.38120477846764866	Positive
Amphosoma	cox_(%)	-0.42072614550380577	0.13413196808537142	Negative
Amphosoma	humus_(%)	-0.42072614550380577	0.13413196808537142	Negative
Amphosoma	hl_(%)	-0.4385725123578182	0.1167155913889302	Negative
Amphosoma	hk_(%)	-0.6980097731892037	0.005502168211568367	Negative
Amphosoma	fk_(%)	-0.4385725123578182	0.1167155913889302	Negative
Amphosoma	hk/fk	-0.33973927013633803	0.23466260939262368	Negative
Amphosoma	sh_(%)	-0.16060401860990525	0.5833620355987701	Negative
Amphosoma	q4/6	0.3582705030528656	0.2084589713673807	Positive
Amphosoma	ph_cacl2	0.2964997266644405	0.3033144576320066	Positive
Amphosoma	p_mg_per_kg	0.1173644751380077	0.6894650860294479	Positive
Amphosoma	k_mg_per_kg	-0.1791352515264328	0.5400341345148312	Negative
Amphosoma	ca_mg_per_kg	-0.061770776388425104	0.833843108881627	Negative
Amphosoma	mg_mg_per_kg	-0.2409060279148579	0.4067239189806463	Negative
Amphosoma	ph_cacl2_status	-0.3366660319872159	0.23919496622045788	Negative
Amphosoma	p_mg_per_kg_status	-0.5164391558638847	0.058662620229768425	Negative
Amphosoma	k_mg_per_kg_status	0.27460798269450243	0.3420442466100342	Positive
Amphosoma	ca_mg_per_kg_status	0.47394732658394473	0.0868855524844054	Positive
Amphosoma	mg_mg_per_kg_status	0.023112508176051216	0.9374893860062921	Positive
Angustimassarina	cox_(%)	0.009039692294111373	0.9755326028943918	Positive
Angustimassarina	humus_(%)	0.009039692294111373	0.9755326028943918	Positive
Angustimassarina	hl_(%)	-0.45688947632819715	0.10051183042329316	Negative
Angustimassarina	hk_(%)	-0.5912687340717846	0.025951922621961873	Negative
Angustimassarina	fk_(%)	-0.45688947632819715	0.10051183042329316	Negative
Angustimassarina	hk/fk	-0.43001362477947974	0.12486397811709683	Negative
Angustimassarina	sh_(%)	-0.47032740210255586	0.08966234236964911	Negative
Angustimassarina	q4/6	0.3583446873162331	0.20835794605583813	Positive
Angustimassarina	ph_cacl2	0.0	1.0	Negative
Angustimassarina	p_mg_per_kg	-0.14781718351794615	0.6140500234892885	Negative
Angustimassarina	k_mg_per_kg	0.13437925774358742	0.6469450498179475	Positive
Angustimassarina	ca_mg_per_kg	-0.03583446873162331	0.903202262103226	Negative
Angustimassarina	mg_mg_per_kg	-0.08062755464615244	0.7840851172451102	Negative
Angustimassarina	ph_cacl2_status	-0.4598240992457779	0.09806877533007294	Negative
Angustimassarina	p_mg_per_kg_status	-0.45508364461437806	0.10203590542542125	Negative
Angustimassarina	k_mg_per_kg_status	-0.1991320116215232	0.49492132372285746	Negative
Angustimassarina	ca_mg_per_kg_status	-0.05925568289249714	0.8405277806225897	Negative
Angustimassarina	mg_mg_per_kg_status	-0.25698725054236315	0.3751111744316632	Negative
Annulusmagnus	cox_(%)	0.20989507868443238	0.4713904819118111	Positive
Annulusmagnus	humus_(%)	0.20989507868443238	0.4713904819118111	Positive
Annulusmagnus	hl_(%)	0.0	1.0	Negative
Annulusmagnus	hk_(%)	0.0	1.0	Negative
Annulusmagnus	fk_(%)	0.0	1.0	Negative
Annulusmagnus	hk/fk	-0.41602514716892186	0.13899442751587587	Negative
Annulusmagnus	sh_(%)	-0.41602514716892186	0.13899442751587587	Negative
Annulusmagnus	q4/6	0.41602514716892186	0.13899442751587587	Positive
Annulusmagnus	ph_cacl2	0.27735009811261463	0.3370490579535843	Positive
Annulusmagnus	p_mg_per_kg	0.41602514716892186	0.13899442751587587	Positive
Annulusmagnus	k_mg_per_kg	0.41602514716892186	0.13899442751587587	Positive
Annulusmagnus	ca_mg_per_kg	0.27735009811261463	0.3370490579535843	Positive
Annulusmagnus	mg_mg_per_kg	0.41602514716892186	0.13899442751587587	Positive
Annulusmagnus	ph_cacl2_status	-0.29351975428213717	0.3084311092607553	Negative
Annulusmagnus	p_mg_per_kg_status	-0.3668996928526714	0.1969139218336417	Negative
Annulusmagnus	k_mg_per_kg_status	-0.2401922307076307	0.4081582068554265	Negative
Annulusmagnus	ca_mg_per_kg_status	-0.3668996928526714	0.1969139218336417	Negative
Annulusmagnus	mg_mg_per_kg_status	-0.5188745216627708	0.057276793791090574	Negative
Anthracophyllum	cox_(%)	-0.4361998054450166	0.11893715034501103	Negative
Anthracophyllum	humus_(%)	-0.4361998054450166	0.11893715034501103	Negative
Anthracophyllum	hl_(%)	0.058948311891889454	0.8413454124938703	Positive
Anthracophyllum	hk_(%)	-0.10315954581080652	0.7256341354275961	Negative
Anthracophyllum	fk_(%)	0.058948311891889454	0.8413454124938703	Positive
Anthracophyllum	hk/fk	0.20631909162161305	0.4791484342761453	Positive
Anthracophyllum	sh_(%)	0.3193033560810678	0.2658003125580904	Positive
Anthracophyllum	q4/6	-0.10807190513513067	0.7130616486503463	Negative
Anthracophyllum	ph_cacl2	0.2750921221621508	0.34115933809923726	Positive
Anthracophyllum	p_mg_per_kg	-0.33895279337836437	0.2358174269642928	Negative
Anthracophyllum	k_mg_per_kg	-0.19649437297296485	0.5007696382485547	Negative
Anthracophyllum	ca_mg_per_kg	0.38316402729728144	0.17627913490250696	Positive
Anthracophyllum	mg_mg_per_kg	0.019649437297296485	0.9468425721918361	Positive
Anthracophyllum	ph_cacl2_status	-0.3457170378651742	0.22599900914331547	Negative
Anthracophyllum	p_mg_per_kg_status	-0.23654323643406652	0.4155311339409017	Negative
Anthracophyllum	k_mg_per_kg_status	0.07941225539113157	0.7872709809989455	Positive
Anthracophyllum	ca_mg_per_kg_status	-0.14296569235026	0.6258524355847406	Negative
Anthracophyllum	mg_mg_per_kg_status	0.3308465799422135	0.24792313968686466	Positive
Anungitiomyces	cox_(%)	-0.13993005245628828	0.6332801612625194	Negative
Anungitiomyces	humus_(%)	-0.13993005245628828	0.6332801612625194	Negative
Anungitiomyces	hl_(%)	-0.41602514716892186	0.13899442751587587	Negative
Anungitiomyces	hk_(%)	-0.13867504905630731	0.6363604104741059	Negative
Anungitiomyces	fk_(%)	-0.41602514716892186	0.13899442751587587	Negative
Anungitiomyces	hk/fk	0.27735009811261463	0.3370490579535843	Positive
Anungitiomyces	sh_(%)	-0.13867504905630731	0.6363604104741059	Negative
Anungitiomyces	q4/6	0.13867504905630731	0.6363604104741059	Positive
Anungitiomyces	ph_cacl2	-0.27735009811261463	0.3370490579535843	Negative
Anungitiomyces	p_mg_per_kg	0.13867504905630731	0.6363604104741059	Positive
Anungitiomyces	k_mg_per_kg	-0.27735009811261463	0.3370490579535843	Negative
Anungitiomyces	ca_mg_per_kg	-0.27735009811261463	0.3370490579535843	Negative
Anungitiomyces	mg_mg_per_kg	-0.13867504905630731	0.6363604104741059	Negative
Anungitiomyces	ph_cacl2_status	0.07337993857053429	0.8031294212066562	Positive
Anungitiomyces	p_mg_per_kg_status	0.29351975428213717	0.3084311092607553	Positive
Anungitiomyces	k_mg_per_kg_status	0.32025630761017426	0.2642960660107213	Positive
Anungitiomyces	ca_mg_per_kg_status	0.0	1.0	Negative
Anungitiomyces	mg_mg_per_kg_status	0.1729581738875903	0.5543200094038623	Positive
Aphanoascella	cox_(%)	-0.41979015736886477	0.13509086839354473	Negative
Aphanoascella	humus_(%)	-0.41979015736886477	0.13509086839354473	Negative
Aphanoascella	hl_(%)	-0.27735009811261463	0.3370490579535843	Negative
Aphanoascella	hk_(%)	-0.41602514716892186	0.13899442751587587	Negative
Aphanoascella	fk_(%)	-0.27735009811261463	0.3370490579535843	Negative
Aphanoascella	hk/fk	-0.13867504905630731	0.6363604104741059	Negative
Aphanoascella	sh_(%)	0.0	1.0	Negative
Aphanoascella	q4/6	0.27735009811261463	0.3370490579535843	Positive
Aphanoascella	ph_cacl2	0.41602514716892186	0.13899442751587587	Positive
Aphanoascella	p_mg_per_kg	0.27735009811261463	0.3370490579535843	Positive
Aphanoascella	k_mg_per_kg	-0.13867504905630731	0.6363604104741059	Negative
Aphanoascella	ca_mg_per_kg	0.13867504905630731	0.6363604104741059	Positive
Aphanoascella	mg_mg_per_kg	0.0	1.0	Negative
Aphanoascella	ph_cacl2_status	-0.29351975428213717	0.3084311092607553	Negative
Aphanoascella	p_mg_per_kg_status	-0.3668996928526714	0.1969139218336417	Negative
Aphanoascella	k_mg_per_kg_status	0.32025630761017426	0.2642960660107213	Positive
Aphanoascella	ca_mg_per_kg_status	0.3668996928526714	0.1969139218336417	Positive
Aphanoascella	mg_mg_per_kg_status	0.1729581738875903	0.5543200094038623	Positive
Aphanoascus	cox_(%)	0.41979015736886477	0.13509086839354473	Positive
Aphanoascus	humus_(%)	0.41979015736886477	0.13509086839354473	Positive
Aphanoascus	hl_(%)	0.41602514716892186	0.13899442751587587	Positive
Aphanoascus	hk_(%)	0.41602514716892186	0.13899442751587587	Positive
Aphanoascus	fk_(%)	0.41602514716892186	0.13899442751587587	Positive
Aphanoascus	hk/fk	0.0	1.0	Negative
Aphanoascus	sh_(%)	0.27735009811261463	0.3370490579535843	Positive
Aphanoascus	q4/6	-0.41602514716892186	0.13899442751587587	Negative
Aphanoascus	ph_cacl2	0.0	1.0	Negative
Aphanoascus	p_mg_per_kg	0.0	1.0	Negative
Aphanoascus	k_mg_per_kg	0.27735009811261463	0.3370490579535843	Positive
Aphanoascus	ca_mg_per_kg	0.0	1.0	Negative
Aphanoascus	mg_mg_per_kg	0.13867504905630731	0.6363604104741059	Positive
Aphanoascus	ph_cacl2_status	0.3668996928526714	0.1969139218336417	Positive
Aphanoascus	p_mg_per_kg_status	0.29351975428213717	0.3084311092607553	Positive
Aphanoascus	k_mg_per_kg_status	-0.2401922307076307	0.4081582068554265	Negative
Aphanoascus	ca_mg_per_kg_status	0.3668996928526714	0.1969139218336417	Positive
Aphanoascus	mg_mg_per_kg_status	0.1729581738875903	0.5543200094038623	Positive
Apiognomonia	cox_(%)	0.20989507868443238	0.4713904819118111	Positive
Apiognomonia	humus_(%)	0.20989507868443238	0.4713904819118111	Positive
Apiognomonia	hl_(%)	0.0	1.0	Negative
Apiognomonia	hk_(%)	0.0	1.0	Negative
Apiognomonia	fk_(%)	0.0	1.0	Negative
Apiognomonia	hk/fk	-0.41602514716892186	0.13899442751587587	Negative
Apiognomonia	sh_(%)	-0.41602514716892186	0.13899442751587587	Negative
Apiognomonia	q4/6	0.41602514716892186	0.13899442751587587	Positive
Apiognomonia	ph_cacl2	0.27735009811261463	0.3370490579535843	Positive
Apiognomonia	p_mg_per_kg	0.41602514716892186	0.13899442751587587	Positive
Apiognomonia	k_mg_per_kg	0.41602514716892186	0.13899442751587587	Positive
Apiognomonia	ca_mg_per_kg	0.27735009811261463	0.3370490579535843	Positive
Apiognomonia	mg_mg_per_kg	0.41602514716892186	0.13899442751587587	Positive
Apiognomonia	ph_cacl2_status	-0.29351975428213717	0.3084311092607553	Negative
Apiognomonia	p_mg_per_kg_status	-0.3668996928526714	0.1969139218336417	Negative
Apiognomonia	k_mg_per_kg_status	-0.2401922307076307	0.4081582068554265	Negative
Apiognomonia	ca_mg_per_kg_status	-0.3668996928526714	0.1969139218336417	Negative
Apiognomonia	mg_mg_per_kg_status	-0.5188745216627708	0.057276793791090574	Negative
Apiospora	cox_(%)	0.20989507868443238	0.4713904819118111	Positive
Apiospora	humus_(%)	0.20989507868443238	0.4713904819118111	Positive
Apiospora	hl_(%)	-0.13867504905630731	0.6363604104741059	Negative
Apiospora	hk_(%)	-0.27735009811261463	0.3370490579535843	Negative
Apiospora	fk_(%)	-0.13867504905630731	0.6363604104741059	Negative
Apiospora	hk/fk	-0.27735009811261463	0.3370490579535843	Negative
Apiospora	sh_(%)	-0.27735009811261463	0.3370490579535843	Negative
Apiospora	q4/6	0.0	1.0	Negative
Apiospora	ph_cacl2	-0.41602514716892186	0.13899442751587587	Negative
Apiospora	p_mg_per_kg	-0.41602514716892186	0.13899442751587587	Negative
Apiospora	k_mg_per_kg	0.0	1.0	Negative
Apiospora	ca_mg_per_kg	-0.41602514716892186	0.13899442751587587	Negative
Apiospora	mg_mg_per_kg	-0.41602514716892186	0.13899442751587587	Negative
Apiospora	ph_cacl2_status	0.07337993857053429	0.8031294212066562	Positive
Apiospora	p_mg_per_kg_status	-0.07337993857053429	0.8031294212066562	Negative
Apiospora	k_mg_per_kg_status	-0.2401922307076307	0.4081582068554265	Negative
Apiospora	ca_mg_per_kg_status	0.0	1.0	Negative
Apiospora	mg_mg_per_kg_status	-0.3459163477751806	0.22571361240397014	Negative
Aplosporella	cox_(%)	-0.14374766315801682	0.623944373297983	Negative
Aplosporella	humus_(%)	-0.14374766315801682	0.623944373297983	Negative
Aplosporella	hl_(%)	0.368426949324309	0.1949138608644467	Positive
Aplosporella	hk_(%)	0.27017976283782663	0.35019711914782325	Positive
Aplosporella	fk_(%)	0.368426949324309	0.1949138608644467	Positive
Aplosporella	hk/fk	0.2505303255405302	0.38764205200886004	Positive
Aplosporella	sh_(%)	0.5354471663513293	0.04846591573222281	Positive
Aplosporella	q4/6	-0.368426949324309	0.1949138608644467	Negative
Aplosporella	ph_cacl2	0.3880763866216056	0.17033359782359406	Positive
Aplosporella	p_mg_per_kg	-0.18175729499999246	0.5340189286929429	Negative
Aplosporella	k_mg_per_kg	0.05403595256756533	0.8544323519581772	Positive
Aplosporella	ca_mg_per_kg	0.5059730104053844	0.06489389028160393	Positive
Aplosporella	mg_mg_per_kg	0.2800044814864749	0.3322527257587331	Positive
Aplosporella	ph_cacl2_status	-0.12477005877840872	0.6708450617985292	Negative
Aplosporella	p_mg_per_kg_status	-0.010397504898200727	0.9718587000788205	Negative
Aplosporella	k_mg_per_kg_status	-0.05955919154334868	0.8397205695383476	Negative
Aplosporella	ca_mg_per_kg_status	0.09097816785925636	0.7570831643697409	Positive
Aplosporella	mg_mg_per_kg_status	0.5146502354656655	0.05969585283431459	Positive
Apodus	cox_(%)	0.0	1.0	Negative
Apodus	humus_(%)	0.0	1.0	Negative
Apodus	hl_(%)	0.13867504905630731	0.6363604104741059	Positive
Apodus	hk_(%)	0.13867504905630731	0.6363604104741059	Positive
Apodus	fk_(%)	0.13867504905630731	0.6363604104741059	Positive
Apodus	hk/fk	0.13867504905630731	0.6363604104741059	Positive
Apodus	sh_(%)	0.13867504905630731	0.6363604104741059	Positive
Apodus	q4/6	-0.13867504905630731	0.6363604104741059	Negative
Apodus	ph_cacl2	0.13867504905630731	0.6363604104741059	Positive
Apodus	p_mg_per_kg	-0.27735009811261463	0.3370490579535843	Negative
Apodus	k_mg_per_kg	0.13867504905630731	0.6363604104741059	Positive
Apodus	ca_mg_per_kg	0.41602514716892186	0.13899442751587587	Positive
Apodus	mg_mg_per_kg	0.27735009811261463	0.3370490579535843	Positive
Apodus	ph_cacl2_status	-0.29351975428213717	0.3084311092607553	Negative
Apodus	p_mg_per_kg_status	-0.07337993857053429	0.8031294212066562	Negative
Apodus	k_mg_per_kg_status	-0.2401922307076307	0.4081582068554265	Negative
Apodus	ca_mg_per_kg_status	-0.3668996928526714	0.1969139218336417	Negative
Apodus	mg_mg_per_kg_status	0.1729581738875903	0.5543200094038623	Positive
Aporpium	cox_(%)	-0.20536117306828147	0.48123681700895526	Negative
Aporpium	humus_(%)	-0.20536117306828147	0.48123681700895526	Negative
Aporpium	hl_(%)	-0.6105579948610594	0.02038833655949962	Negative
Aporpium	hk_(%)	-0.20351933162035318	0.4852643156885843	Negative
Aporpium	fk_(%)	-0.6105579948610594	0.02038833655949962	Negative
Aporpium	hk/fk	0.40703866324070637	0.1486141440865914	Positive
Aporpium	sh_(%)	-0.20351933162035318	0.4852643156885843	Negative
Aporpium	q4/6	0.20351933162035318	0.4852643156885843	Positive
Aporpium	ph_cacl2	-0.40703866324070637	0.1486141440865914	Negative
Aporpium	p_mg_per_kg	0.20351933162035318	0.4852643156885843	Positive
Aporpium	k_mg_per_kg	-0.40703866324070637	0.1486141440865914	Negative
Aporpium	ca_mg_per_kg	-0.40703866324070637	0.1486141440865914	Negative
Aporpium	mg_mg_per_kg	-0.20351933162035318	0.4852643156885843	Negative
Aporpium	ph_cacl2_status	0.10769230769230771	0.714030808726249	Positive
Aporpium	p_mg_per_kg_status	0.43076923076923085	0.12412955584045603	Positive
Aporpium	k_mg_per_kg_status	0.4700077635852144	0.08991047235586964	Positive
Aporpium	ca_mg_per_kg_status	0.0	1.0	Negative
Aporpium	mg_mg_per_kg_status	0.25383320350286326	0.38120477846764866	Positive
Aquanectria	cox_(%)	0.20989507868443238	0.4713904819118111	Positive
Aquanectria	humus_(%)	0.20989507868443238	0.4713904819118111	Positive
Aquanectria	hl_(%)	-0.13867504905630731	0.6363604104741059	Negative
Aquanectria	hk_(%)	-0.27735009811261463	0.3370490579535843	Negative
Aquanectria	fk_(%)	-0.13867504905630731	0.6363604104741059	Negative
Aquanectria	hk/fk	-0.27735009811261463	0.3370490579535843	Negative
Aquanectria	sh_(%)	-0.27735009811261463	0.3370490579535843	Negative
Aquanectria	q4/6	0.0	1.0	Negative
Aquanectria	ph_cacl2	-0.41602514716892186	0.13899442751587587	Negative
Aquanectria	p_mg_per_kg	-0.41602514716892186	0.13899442751587587	Negative
Aquanectria	k_mg_per_kg	0.0	1.0	Negative
Aquanectria	ca_mg_per_kg	-0.41602514716892186	0.13899442751587587	Negative
Aquanectria	mg_mg_per_kg	-0.41602514716892186	0.13899442751587587	Negative
Aquanectria	ph_cacl2_status	0.07337993857053429	0.8031294212066562	Positive
Aquanectria	p_mg_per_kg_status	-0.07337993857053429	0.8031294212066562	Negative
Aquanectria	k_mg_per_kg_status	-0.2401922307076307	0.4081582068554265	Negative
Aquanectria	ca_mg_per_kg_status	0.0	1.0	Negative
Aquanectria	mg_mg_per_kg_status	-0.3459163477751806	0.22571361240397014	Negative
Aquilomyces	cox_(%)	0.2052502364784706	0.4814789503624287	Positive
Aquilomyces	humus_(%)	0.2052502364784706	0.4814789503624287	Positive
Aquilomyces	hl_(%)	-0.32052388726899966	0.26387460621892966	Negative
Aquilomyces	hk_(%)	-0.27121251999684587	0.3482861990885996	Negative
Aquilomyces	fk_(%)	-0.32052388726899966	0.26387460621892966	Negative
Aquilomyces	hk/fk	-0.30819604545096124	0.28370946111247375	Negative
Aquilomyces	sh_(%)	-0.5300971981756533	0.051194212922961044	Negative
Aquilomyces	q4/6	0.33285172908703814	0.24489422005029432	Positive
Aquilomyces	ph_cacl2	-0.27121251999684587	0.3482861990885996	Negative
Aquilomyces	p_mg_per_kg	0.036983525454115346	0.9001122935874064	Positive
Aquilomyces	k_mg_per_kg	0.11095057636234604	0.7057252198509845	Positive
Aquilomyces	ca_mg_per_kg	-0.27121251999684587	0.3482861990885996	Negative
Aquilomyces	mg_mg_per_kg	-0.11095057636234604	0.7057252198509845	Negative
Aquilomyces	ph_cacl2_status	-0.09132593022748192	0.7561802254807148	Negative
Aquilomyces	p_mg_per_kg_status	-0.12394233388015403	0.6729177604296294	Negative
Aquilomyces	k_mg_per_kg_status	-0.1494671386356041	0.610055642845772	Negative
Aquilomyces	ca_mg_per_kg_status	-0.22831482556870478	0.4324046079302347	Negative
Aquilomyces	mg_mg_per_kg_status	-0.47664112414825727	0.08485864969283118	Negative
Arachnomyces	cox_(%)	0.41979015736886477	0.13509086839354473	Positive
Arachnomyces	humus_(%)	0.41979015736886477	0.13509086839354473	Positive
Arachnomyces	hl_(%)	0.41602514716892186	0.13899442751587587	Positive
Arachnomyces	hk_(%)	0.41602514716892186	0.13899442751587587	Positive
Arachnomyces	fk_(%)	0.41602514716892186	0.13899442751587587	Positive
Arachnomyces	hk/fk	0.0	1.0	Negative
Arachnomyces	sh_(%)	0.27735009811261463	0.3370490579535843	Positive
Arachnomyces	q4/6	-0.41602514716892186	0.13899442751587587	Negative
Arachnomyces	ph_cacl2	0.0	1.0	Negative
Arachnomyces	p_mg_per_kg	0.0	1.0	Negative
Arachnomyces	k_mg_per_kg	0.27735009811261463	0.3370490579535843	Positive
Arachnomyces	ca_mg_per_kg	0.0	1.0	Negative
Arachnomyces	mg_mg_per_kg	0.13867504905630731	0.6363604104741059	Positive
Arachnomyces	ph_cacl2_status	0.3668996928526714	0.1969139218336417	Positive
Arachnomyces	p_mg_per_kg_status	0.29351975428213717	0.3084311092607553	Positive
Arachnomyces	k_mg_per_kg_status	-0.2401922307076307	0.4081582068554265	Negative
Arachnomyces	ca_mg_per_kg_status	0.3668996928526714	0.1969139218336417	Positive
Arachnomyces	mg_mg_per_kg_status	0.1729581738875903	0.5543200094038623	Positive
Aristastoma	cox_(%)	0.30804175960242214	0.28396309822283977	Positive
Aristastoma	humus_(%)	0.30804175960242214	0.28396309822283977	Positive
Aristastoma	hl_(%)	-0.10902821336804634	0.7106218591260346	Negative
Aristastoma	hk_(%)	-0.21805642673609268	0.45391306826013034	Negative
Aristastoma	fk_(%)	-0.10902821336804634	0.7106218591260346	Negative
Aristastoma	hk/fk	-0.5015297814930132	0.06767729848047004	Negative
Aristastoma	sh_(%)	-0.5015297814930132	0.06767729848047004	Negative
Aristastoma	q4/6	0.2834733547569205	0.3260427414573789	Positive
Aristastoma	ph_cacl2	-0.13810240359952536	0.6377677174252858	Negative
Aristastoma	p_mg_per_kg	-0.04361128534721853	0.882316264822782	Negative
Aristastoma	k_mg_per_kg	0.2834733547569205	0.3260427414573789	Positive
Aristastoma	ca_mg_per_kg	-0.13810240359952536	0.6377677174252858	Negative
Aristastoma	mg_mg_per_kg	-0.04361128534721853	0.882316264822782	Negative
Aristastoma	ph_cacl2_status	-0.1423076923076923	0.6274596892333936	Negative
Aristastoma	p_mg_per_kg_status	-0.3076923076923077	0.2845380697319266	Negative
Aristastoma	k_mg_per_kg_status	-0.3525058226889108	0.21640370611157558	Negative
Aristastoma	ca_mg_per_kg_status	-0.25	0.38868097867816664	Negative
Aristastoma	mg_mg_per_kg_status	-0.6255175372034845	0.016734784323391993	Negative
Armillaria	cox_(%)	-0.41979015736886477	0.13509086839354473	Negative
Armillaria	humus_(%)	-0.41979015736886477	0.13509086839354473	Negative
Armillaria	hl_(%)	-0.27735009811261463	0.3370490579535843	Negative
Armillaria	hk_(%)	-0.41602514716892186	0.13899442751587587	Negative
Armillaria	fk_(%)	-0.27735009811261463	0.3370490579535843	Negative
Armillaria	hk/fk	-0.13867504905630731	0.6363604104741059	Negative
Armillaria	sh_(%)	0.0	1.0	Negative
Armillaria	q4/6	0.27735009811261463	0.3370490579535843	Positive
Armillaria	ph_cacl2	0.41602514716892186	0.13899442751587587	Positive
Armillaria	p_mg_per_kg	0.27735009811261463	0.3370490579535843	Positive
Armillaria	k_mg_per_kg	-0.13867504905630731	0.6363604104741059	Negative
Armillaria	ca_mg_per_kg	0.13867504905630731	0.6363604104741059	Positive
Armillaria	mg_mg_per_kg	0.0	1.0	Negative
Armillaria	ph_cacl2_status	-0.29351975428213717	0.3084311092607553	Negative
Armillaria	p_mg_per_kg_status	-0.3668996928526714	0.1969139218336417	Negative
Armillaria	k_mg_per_kg_status	0.32025630761017426	0.2642960660107213	Positive
Armillaria	ca_mg_per_kg_status	0.3668996928526714	0.1969139218336417	Positive
Armillaria	mg_mg_per_kg_status	0.1729581738875903	0.5543200094038623	Positive
Arrhenia	cox_(%)	-0.24355324226579658	0.40142753802979425	Negative
Arrhenia	humus_(%)	-0.24355324226579658	0.40142753802979425	Negative
Arrhenia	hl_(%)	-0.17200999512715917	0.5565269971556526	Negative
Arrhenia	hk_(%)	-0.3495686997745493	0.2205232682288473	Negative
Arrhenia	fk_(%)	-0.17200999512715917	0.5565269971556526	Negative
Arrhenia	hk/fk	-0.39395837593639677	0.1633880252784755	Negative
Arrhenia	sh_(%)	-0.09432806184392599	0.7483975462677697	Negative
Arrhenia	q4/6	0.38840966641616587	0.16993500964868352	Positive
Arrhenia	ph_cacl2	0.6769425614681748	0.007833707112480031	Positive
Arrhenia	p_mg_per_kg	0.5715170805837869	0.03275424760780506	Positive
Arrhenia	k_mg_per_kg	0.1609125760866973	0.5826292556203603	Positive
Arrhenia	ca_mg_per_kg	0.3218251521733946	0.26183074886042473	Positive
Arrhenia	mg_mg_per_kg	0.27743547601154706	0.33689418610184363	Positive
Arrhenia	ph_cacl2_status	-0.3670126371966897	0.19676556771226122	Negative
Arrhenia	p_mg_per_kg_status	-0.5314342986608066	0.050502142183293436	Negative
Arrhenia	k_mg_per_kg_status	0.17939874036898087	0.5394283394928495	Positive
Arrhenia	ca_mg_per_kg_status	0.44041516463602753	0.11500994750480399	Positive
Arrhenia	mg_mg_per_kg_status	0.02768182661791332	0.9251600454876459	Positive
Arthonia	cox_(%)	0.0	1.0	Negative
Arthonia	humus_(%)	0.0	1.0	Negative
Arthonia	hl_(%)	0.20351933162035318	0.4852643156885843	Positive
Arthonia	hk_(%)	0.20351933162035318	0.4852643156885843	Positive
Arthonia	fk_(%)	0.20351933162035318	0.4852643156885843	Positive
Arthonia	hk/fk	0.20351933162035318	0.4852643156885843	Positive
Arthonia	sh_(%)	0.20351933162035318	0.4852643156885843	Positive
Arthonia	q4/6	-0.20351933162035318	0.4852643156885843	Negative
Arthonia	ph_cacl2	0.20351933162035318	0.4852643156885843	Positive
Arthonia	p_mg_per_kg	-0.40703866324070637	0.1486141440865914	Negative
Arthonia	k_mg_per_kg	0.20351933162035318	0.4852643156885843	Positive
Arthonia	ca_mg_per_kg	0.6105579948610594	0.02038833655949962	Positive
Arthonia	mg_mg_per_kg	0.40703866324070637	0.1486141440865914	Positive
Arthonia	ph_cacl2_status	-0.43076923076923085	0.12412955584045603	Negative
Arthonia	p_mg_per_kg_status	-0.10769230769230771	0.714030808726249	Negative
Arthonia	k_mg_per_kg_status	-0.3525058226889108	0.21640370611157558	Negative
Arthonia	ca_mg_per_kg_status	-0.5384615384615384	0.04697614585955521	Negative
Arthonia	mg_mg_per_kg_status	0.25383320350286326	0.38120477846764866	Positive
Arthroderma	cox_(%)	0.26122757369987165	0.3670019205393722	Positive
Arthroderma	humus_(%)	0.26122757369987165	0.3670019205393722	Positive
Arthroderma	hl_(%)	-0.08629489272626915	0.769270584862031	Negative
Arthroderma	hk_(%)	-0.2588846781788074	0.3714707017244274	Negative
Arthroderma	fk_(%)	-0.08629489272626915	0.769270584862031	Negative
Arthroderma	hk/fk	-0.2588846781788074	0.3714707017244274	Negative
Arthroderma	sh_(%)	-0.2588846781788074	0.3714707017244274	Negative
Arthroderma	q4/6	-0.08629489272626915	0.769270584862031	Negative
Arthroderma	ph_cacl2	-0.43147446363134573	0.123446737406654	Negative
Arthroderma	p_mg_per_kg	-0.6903591418101532	0.006275602514423838	Negative
Arthroderma	k_mg_per_kg	0.08629489272626915	0.769270584862031	Positive
Arthroderma	ca_mg_per_kg	-0.2588846781788074	0.3714707017244274	Negative
Arthroderma	mg_mg_per_kg	-0.3451795709050766	0.22676973492312752	Negative
Arthroderma	ph_cacl2_status	-0.09132593022748192	0.7561802254807148	Negative
Arthroderma	p_mg_per_kg_status	-0.13698889534122285	0.6405074695579516	Negative
Arthroderma	k_mg_per_kg_status	-0.4484014159068123	0.10781415190693584	Negative
Arthroderma	ca_mg_per_kg_status	-0.22831482556870478	0.4324046079302347	Negative
Arthroderma	mg_mg_per_kg_status	-0.3228859228101098	0.260171676217085	Negative
Articulospora	cox_(%)	0.16796775328675628	0.5659772074159628	Positive
Articulospora	humus_(%)	0.16796775328675628	0.5659772074159628	Positive
Articulospora	hl_(%)	0.0	1.0	Negative
Articulospora	hk_(%)	-0.15536386656646636	0.5958631191953072	Negative
Articulospora	fk_(%)	0.0	1.0	Negative
Articulospora	hk/fk	-0.4327993425780134	0.12217085483062759	Negative
Articulospora	sh_(%)	-0.17200999512715917	0.5565269971556526	Negative
Articulospora	q4/6	0.15536386656646636	0.5958631191953072	Positive
Articulospora	ph_cacl2	0.2441432188901614	0.4002520725809523	Positive
Articulospora	p_mg_per_kg	0.22194838080923765	0.4456919854844934	Positive
Articulospora	k_mg_per_kg	0.2885328950520089	0.31710362585959634	Positive
Articulospora	ca_mg_per_kg	0.05548709520230941	0.8505626158485852	Positive
Articulospora	mg_mg_per_kg	0.11652289992484975	0.6915916795029775	Positive
Articulospora	ph_cacl2_status	-0.09982743731749957	0.7341991154684512	Negative
Articulospora	p_mg_per_kg_status	-0.2965462108549253	0.3032350340944088	Negative
Articulospora	k_mg_per_kg_status	-0.15697389782285828	0.5920108976371075	Negative
Articulospora	ca_mg_per_kg_status	0.27892960426948415	0.33419033779207885	Positive
Articulospora	mg_mg_per_kg_status	-0.2006932429798716	0.4914746876566475	Negative
Ascochyta	cox_(%)	-0.5060686050611222	0.0648349211100653	Negative
Ascochyta	humus_(%)	-0.5060686050611222	0.0648349211100653	Negative
Ascochyta	hl_(%)	0.029074190231479023	0.9214060290497026	Positive
Ascochyta	hk_(%)	-0.0654169280208278	0.8241708918866163	Negative
Ascochyta	fk_(%)	0.029074190231479023	0.9214060290497026	Positive
Ascochyta	hk/fk	0.23259352185183219	0.42358798119959806	Positive
Ascochyta	sh_(%)	0.32708464010413896	0.2536669175434305	Positive
Ascochyta	q4/6	-0.029074190231479023	0.9214060290497026	Negative
Ascochyta	ph_cacl2	0.17444514138887413	0.5508664460004657	Positive
Ascochyta	p_mg_per_kg	0.07995402313656731	0.7858503710438625	Positive
Ascochyta	k_mg_per_kg	-0.42157575835644584	0.13326552083734988	Negative
Ascochyta	ca_mg_per_kg	-0.014537095115739512	0.9606614860960225	Negative
Ascochyta	mg_mg_per_kg	-0.21805642673609268	0.45391306826013034	Negative
Ascochyta	ph_cacl2_status	0.08846153846153847	0.7636259264033068	Positive
Ascochyta	p_mg_per_kg_status	-0.019230769230769232	0.947973779706964	Negative
Ascochyta	k_mg_per_kg_status	0.4700077635852144	0.08991047235586964	Positive
Ascochyta	ca_mg_per_kg_status	0.25	0.38868097867816664	Positive
Ascochyta	mg_mg_per_kg_status	0.25383320350286326	0.38120477846764866	Positive
Ascotremella	cox_(%)	0.0	1.0	Negative
Ascotremella	humus_(%)	0.0	1.0	Negative
Ascotremella	hl_(%)	0.20351933162035318	0.4852643156885843	Positive
Ascotremella	hk_(%)	0.20351933162035318	0.4852643156885843	Positive
Ascotremella	fk_(%)	0.20351933162035318	0.4852643156885843	Positive
Ascotremella	hk/fk	0.20351933162035318	0.4852643156885843	Positive
Ascotremella	sh_(%)	0.20351933162035318	0.4852643156885843	Positive
Ascotremella	q4/6	-0.20351933162035318	0.4852643156885843	Negative
Ascotremella	ph_cacl2	0.20351933162035318	0.4852643156885843	Positive
Ascotremella	p_mg_per_kg	-0.40703866324070637	0.1486141440865914	Negative
Ascotremella	k_mg_per_kg	0.20351933162035318	0.4852643156885843	Positive
Ascotremella	ca_mg_per_kg	0.6105579948610594	0.02038833655949962	Positive
Ascotremella	mg_mg_per_kg	0.40703866324070637	0.1486141440865914	Positive
Ascotremella	ph_cacl2_status	-0.43076923076923085	0.12412955584045603	Negative
Ascotremella	p_mg_per_kg_status	-0.10769230769230771	0.714030808726249	Negative
Ascotremella	k_mg_per_kg_status	-0.3525058226889108	0.21640370611157558	Negative
Ascotremella	ca_mg_per_kg_status	-0.5384615384615384	0.04697614585955521	Negative
Ascotremella	mg_mg_per_kg_status	0.25383320350286326	0.38120477846764866	Positive
Ascotricha	cox_(%)	0.3069972689059032	0.2856836842939638	Positive
Ascotricha	humus_(%)	0.3069972689059032	0.2856836842939638	Positive
Ascotricha	hl_(%)	0.440472475098838	0.11495717262019163	Positive
Ascotricha	hk_(%)	0.3042438745528056	0.29024857697583156	Positive
Ascotricha	fk_(%)	0.440472475098838	0.11495717262019163	Positive
Ascotricha	hk/fk	-0.3723581748258219	0.1898252842095741	Negative
Ascotricha	sh_(%)	0.14531050724910122	0.6201374952841703	Positive
Ascotricha	q4/6	-0.03178667346074089	0.9140972090054292	Negative
Ascotricha	ph_cacl2	0.7265525362455061	0.0032486220016178496	Positive
Ascotricha	p_mg_per_kg	0.49496391531725104	0.07194476126546152	Positive
Ascotricha	k_mg_per_kg	0.6357334692148178	0.014541922889015834	Positive
Ascotricha	ca_mg_per_kg	0.6084877491056112	0.020937856604311977	Positive
Ascotricha	mg_mg_per_kg	0.6902249094332308	0.006289888862939821	Positive
Ascotricha	ph_cacl2_status	-0.151379339369647	0.605438986472549	Negative
Ascotricha	p_mg_per_kg_status	-0.2907444454559887	0.3132406086211104	Negative
Ascotricha	k_mg_per_kg_status	-0.3119847561464253	0.27752286810884924	Negative
Ascotricha	ca_mg_per_kg_status	0.300355832082633	0.2967667023673458	Positive
Ascotricha	mg_mg_per_kg_status	0.03398138330152924	0.9081881258337046	Positive
Aspergillus	cox_(%)	0.04479758027925369	0.8791361821107273	Positive
Aspergillus	humus_(%)	0.04479758027925369	0.8791361821107273	Positive
Aspergillus	hl_(%)	-0.11098950035715144	0.7056261812729618	Negative
Aspergillus	hk_(%)	-0.2930122809428798	0.30930735453614827	Negative
Aspergillus	fk_(%)	-0.11098950035715144	0.7056261812729618	Negative
Aspergillus	hk/fk	-0.19978110064287258	0.49348700846389626	Negative
Aspergillus	sh_(%)	-0.13318740042858174	0.6498928655714444	Negative
Aspergillus	q4/6	-0.013318740042858173	0.9639564115923793	Negative
Aspergillus	ph_cacl2	-0.05771454018571874	0.8446288341133914	Negative
Aspergillus	p_mg_per_kg	-0.5149912816571827	0.059497871693389555	Negative
Aspergillus	k_mg_per_kg	0.11098950035715144	0.7056261812729618	Positive
Aspergillus	ca_mg_per_kg	0.0932311803000072	0.7512385450872954	Positive
Aspergillus	mg_mg_per_kg	-0.0843520202714351	0.7743413158232835	Negative
Aspergillus	ph_cacl2_status	-0.35003153437252993	0.2198708879371433	Negative
Aspergillus	p_mg_per_kg_status	-0.2983490259416866	0.3001639831096377	Negative
Aspergillus	k_mg_per_kg_status	-0.34090463127281273	0.23295786358787018	Negative
Aspergillus	ca_mg_per_kg_status	-0.1879363942939758	0.5199610281656426	Negative
Aspergillus	mg_mg_per_kg_status	-0.0775198076549278	0.7922381122823948	Negative
Asterocalycella	cox_(%)	0.0	1.0	Negative
Asterocalycella	humus_(%)	0.0	1.0	Negative
Asterocalycella	hl_(%)	0.13867504905630731	0.6363604104741059	Positive
Asterocalycella	hk_(%)	0.13867504905630731	0.6363604104741059	Positive
Asterocalycella	fk_(%)	0.13867504905630731	0.6363604104741059	Positive
Asterocalycella	hk/fk	0.13867504905630731	0.6363604104741059	Positive
Asterocalycella	sh_(%)	0.13867504905630731	0.6363604104741059	Positive
Asterocalycella	q4/6	-0.13867504905630731	0.6363604104741059	Negative
Asterocalycella	ph_cacl2	0.13867504905630731	0.6363604104741059	Positive
Asterocalycella	p_mg_per_kg	-0.27735009811261463	0.3370490579535843	Negative
Asterocalycella	k_mg_per_kg	0.13867504905630731	0.6363604104741059	Positive
Asterocalycella	ca_mg_per_kg	0.41602514716892186	0.13899442751587587	Positive
Asterocalycella	mg_mg_per_kg	0.27735009811261463	0.3370490579535843	Positive
Asterocalycella	ph_cacl2_status	-0.29351975428213717	0.3084311092607553	Negative
Asterocalycella	p_mg_per_kg_status	-0.07337993857053429	0.8031294212066562	Negative
Asterocalycella	k_mg_per_kg_status	-0.2401922307076307	0.4081582068554265	Negative
Asterocalycella	ca_mg_per_kg_status	-0.3668996928526714	0.1969139218336417	Negative
Asterocalycella	mg_mg_per_kg_status	0.1729581738875903	0.5543200094038623	Positive
Astragalicola	cox_(%)	-0.41979015736886477	0.13509086839354473	Negative
Astragalicola	humus_(%)	-0.41979015736886477	0.13509086839354473	Negative
Astragalicola	hl_(%)	-0.27735009811261463	0.3370490579535843	Negative
Astragalicola	hk_(%)	-0.41602514716892186	0.13899442751587587	Negative
Astragalicola	fk_(%)	-0.27735009811261463	0.3370490579535843	Negative
Astragalicola	hk/fk	-0.13867504905630731	0.6363604104741059	Negative
Astragalicola	sh_(%)	0.0	1.0	Negative
Astragalicola	q4/6	0.27735009811261463	0.3370490579535843	Positive
Astragalicola	ph_cacl2	0.41602514716892186	0.13899442751587587	Positive
Astragalicola	p_mg_per_kg	0.27735009811261463	0.3370490579535843	Positive
Astragalicola	k_mg_per_kg	-0.13867504905630731	0.6363604104741059	Negative
Astragalicola	ca_mg_per_kg	0.13867504905630731	0.6363604104741059	Positive
Astragalicola	mg_mg_per_kg	0.0	1.0	Negative
Astragalicola	ph_cacl2_status	-0.29351975428213717	0.3084311092607553	Negative
Astragalicola	p_mg_per_kg_status	-0.3668996928526714	0.1969139218336417	Negative
Astragalicola	k_mg_per_kg_status	0.32025630761017426	0.2642960660107213	Positive
Astragalicola	ca_mg_per_kg_status	0.3668996928526714	0.1969139218336417	Positive
Astragalicola	mg_mg_per_kg_status	0.1729581738875903	0.5543200094038623	Positive
Astrocystis	cox_(%)	0.0	1.0	Negative
Astrocystis	humus_(%)	0.0	1.0	Negative
Astrocystis	hl_(%)	0.20351933162035318	0.4852643156885843	Positive
Astrocystis	hk_(%)	0.20351933162035318	0.4852643156885843	Positive
Astrocystis	fk_(%)	0.20351933162035318	0.4852643156885843	Positive
Astrocystis	hk/fk	0.20351933162035318	0.4852643156885843	Positive
Astrocystis	sh_(%)	0.20351933162035318	0.4852643156885843	Positive
Astrocystis	q4/6	-0.20351933162035318	0.4852643156885843	Negative
Astrocystis	ph_cacl2	0.20351933162035318	0.4852643156885843	Positive
Astrocystis	p_mg_per_kg	-0.40703866324070637	0.1486141440865914	Negative
Astrocystis	k_mg_per_kg	0.20351933162035318	0.4852643156885843	Positive
Astrocystis	ca_mg_per_kg	0.6105579948610594	0.02038833655949962	Positive
Astrocystis	mg_mg_per_kg	0.40703866324070637	0.1486141440865914	Positive
Astrocystis	ph_cacl2_status	-0.43076923076923085	0.12412955584045603	Negative
Astrocystis	p_mg_per_kg_status	-0.10769230769230771	0.714030808726249	Negative
Astrocystis	k_mg_per_kg_status	-0.3525058226889108	0.21640370611157558	Negative
Astrocystis	ca_mg_per_kg_status	-0.5384615384615384	0.04697614585955521	Negative
Astrocystis	mg_mg_per_kg_status	0.25383320350286326	0.38120477846764866	Positive
Atrocalyx	cox_(%)	0.20989507868443238	0.4713904819118111	Positive
Atrocalyx	humus_(%)	0.20989507868443238	0.4713904819118111	Positive
Atrocalyx	hl_(%)	-0.13867504905630731	0.6363604104741059	Negative
Atrocalyx	hk_(%)	-0.27735009811261463	0.3370490579535843	Negative
Atrocalyx	fk_(%)	-0.13867504905630731	0.6363604104741059	Negative
Atrocalyx	hk/fk	-0.27735009811261463	0.3370490579535843	Negative
Atrocalyx	sh_(%)	-0.27735009811261463	0.3370490579535843	Negative
Atrocalyx	q4/6	0.0	1.0	Negative
Atrocalyx	ph_cacl2	-0.41602514716892186	0.13899442751587587	Negative
Atrocalyx	p_mg_per_kg	-0.41602514716892186	0.13899442751587587	Negative
Atrocalyx	k_mg_per_kg	0.0	1.0	Negative
Atrocalyx	ca_mg_per_kg	-0.41602514716892186	0.13899442751587587	Negative
Atrocalyx	mg_mg_per_kg	-0.41602514716892186	0.13899442751587587	Negative
Atrocalyx	ph_cacl2_status	0.07337993857053429	0.8031294212066562	Positive
Atrocalyx	p_mg_per_kg_status	-0.07337993857053429	0.8031294212066562	Negative
Atrocalyx	k_mg_per_kg_status	-0.2401922307076307	0.4081582068554265	Negative
Atrocalyx	ca_mg_per_kg_status	0.0	1.0	Negative
Atrocalyx	mg_mg_per_kg_status	-0.3459163477751806	0.22571361240397014	Negative
Aurantiosacculus	cox_(%)	0.17183819822865823	0.5569272705648503	Positive
Aurantiosacculus	humus_(%)	0.17183819822865823	0.5569272705648503	Positive
Aurantiosacculus	hl_(%)	0.3689768708966908	0.19419687468322794	Positive
Aurantiosacculus	hk_(%)	0.2365236351901864	0.415570922327797	Positive
Aurantiosacculus	fk_(%)	0.3689768708966908	0.19419687468322794	Positive
Aurantiosacculus	hk/fk	-0.12299229029889693	0.6752994186564292	Negative
Aurantiosacculus	sh_(%)	0.3500549800814759	0.219837872479088	Positive
Aurantiosacculus	q4/6	-0.2554455260054013	0.3780832178604415	Negative
Aurantiosacculus	ph_cacl2	0.5960395606792698	0.024481108551502293	Positive
Aurantiosacculus	p_mg_per_kg	0.1324532357065044	0.6517110474059341	Positive
Aurantiosacculus	k_mg_per_kg	0.4446644341575504	0.11114165100565576	Positive
Aurantiosacculus	ca_mg_per_kg	0.5771176698640549	0.03070477114841575	Positive
Aurantiosacculus	mg_mg_per_kg	0.5298129428260177	0.05134222331420237	Positive
Aurantiosacculus	ph_cacl2_status	-0.170212899269398	0.5607201036811438	Negative
Aurantiosacculus	p_mg_per_kg_status	-0.15519411403974523	0.5962698530937658	Negative
Aurantiosacculus	k_mg_per_kg_status	-0.26765168951565543	0.3548991294334216	Negative
Aurantiosacculus	ca_mg_per_kg_status	0.3754696307413191	0.18585862012360477	Positive
Aurantiosacculus	mg_mg_per_kg_status	0.3893957789726338	0.16875921701095434	Positive
Aureobasidium	cox_(%)	-0.1387194712722481	0.6362512880487643	Negative
Aureobasidium	humus_(%)	-0.1387194712722481	0.6362512880487643	Negative
Aureobasidium	hl_(%)	-0.19069158028526823	0.5137467709923793	Negative
Aureobasidium	hk_(%)	-0.3148628418663731	0.2728770209991713	Negative
Aureobasidium	fk_(%)	-0.19069158028526823	0.5137467709923793	Negative
Aureobasidium	hk/fk	-0.20843033193971178	0.4745608886352959	Negative
Aureobasidium	sh_(%)	-0.22616908359415533	0.43686054363153326	Negative
Aureobasidium	q4/6	0.26164658690304243	0.366205786071496	Positive
Aureobasidium	ph_cacl2	0.21729970776693358	0.45552007527686356	Positive
Aureobasidium	p_mg_per_kg	-0.17295282863082467	0.5543324406283601	Negative
Aureobasidium	k_mg_per_kg	0.12860594949471577	0.661268213179607	Positive
Aureobasidium	ca_mg_per_kg	0.34147096934803844	0.23213215810461246	Positive
Aureobasidium	mg_mg_per_kg	0.16408345280360287	0.575120612058509	Positive
Aureobasidium	ph_cacl2_status	-0.5725743704459971	0.032359789470462016	Negative
Aureobasidium	p_mg_per_kg_status	-0.47401648700857146	0.08683309407745332	Negative
Aureobasidium	k_mg_per_kg_status	-0.19714835607353243	0.49931663312597174	Negative
Aureobasidium	ca_mg_per_kg_status	-0.387191684932744	0.17139460942908386	Negative
Aureobasidium	mg_mg_per_kg_status	-0.14380671751332727	0.623800365395566	Negative
Aureoboletus	cox_(%)	-0.18702535404432774	0.5220232330161205	Negative
Aureoboletus	humus_(%)	-0.18702535404432774	0.5220232330161205	Negative
Aureoboletus	hl_(%)	-0.21805642673609268	0.45391306826013034	Negative
Aureoboletus	hk_(%)	-0.32708464010413896	0.2536669175434305	Negative
Aureoboletus	fk_(%)	-0.21805642673609268	0.45391306826013034	Negative
Aureoboletus	hk/fk	-0.3925015681249668	0.1650906948933765	Negative
Aureoboletus	sh_(%)	-0.2834733547569205	0.3260427414573789	Negative
Aureoboletus	q4/6	0.5015297814930132	0.06767729848047004	Positive
Aureoboletus	ph_cacl2	0.5160668766087526	0.05887657004242199	Positive
Aureoboletus	p_mg_per_kg	0.5015297814930132	0.06767729848047004	Positive
Aureoboletus	k_mg_per_kg	0.17444514138887413	0.5508664460004657	Positive
Aureoboletus	ca_mg_per_kg	0.29801044987266	0.30073936099636894	Positive
Aureoboletus	mg_mg_per_kg	0.2834733547569205	0.3260427414573789	Positive
Aureoboletus	ph_cacl2_status	-0.43076923076923085	0.12412955584045603	Negative
Aureoboletus	p_mg_per_kg_status	-0.5384615384615384	0.04697614585955521	Negative
Aureoboletus	k_mg_per_kg_status	0.0881264556722277	0.7644981957524002	Positive
Aureoboletus	ca_mg_per_kg_status	0.038461538461538464	0.8961396559649237	Positive
Aureoboletus	mg_mg_per_kg_status	-0.2175713172881685	0.4549429517753415	Negative
Aureonarius	cox_(%)	0.014890583938253493	0.959705616244203	Positive
Aureonarius	humus_(%)	0.014890583938253493	0.959705616244203	Positive
Aureonarius	hl_(%)	-0.004919011134174627	0.9866846201265211	Negative
Aureonarius	hk_(%)	-0.17708440083028656	0.5447593820735086	Negative
Aureonarius	fk_(%)	-0.004919011134174627	0.9866846201265211	Negative
Aureonarius	hk/fk	-0.5558482581617329	0.039027062811837626	Negative
Aureonarius	sh_(%)	-0.15740835629358807	0.5909731004694984	Negative
Aureonarius	q4/6	0.3886018795997956	0.1697054071024836	Positive
Aureonarius	ph_cacl2	0.7722847480654165	0.0012076398916652973	Positive
Aureonarius	p_mg_per_kg	0.7280136478578448	0.00315688149400119	Positive
Aureonarius	k_mg_per_kg	0.4377919909415418	0.1174432457137376	Positive
Aureonarius	ca_mg_per_kg	0.4279539686731925	0.12688079942780978	Positive
Aureonarius	mg_mg_per_kg	0.4968201245516373	0.07071946638977063	Positive
Aureonarius	ph_cacl2_status	-0.335773588060503	0.24052109340117564	Negative
Aureonarius	p_mg_per_kg_status	-0.5544168547045515	0.03964117383487234	Negative
Aureonarius	k_mg_per_kg_status	-0.019879946817237412	0.94621979357926	Negative
Aureonarius	ca_mg_per_kg_status	0.4164633650362828	0.13853625395912403	Positive
Aureonarius	mg_mg_per_kg_status	-0.12270169563871837	0.6760284741208871	Negative
Bacidia	cox_(%)	-0.13993005245628828	0.6332801612625194	Negative
Bacidia	humus_(%)	-0.13993005245628828	0.6332801612625194	Negative
Bacidia	hl_(%)	-0.41602514716892186	0.13899442751587587	Negative
Bacidia	hk_(%)	-0.13867504905630731	0.6363604104741059	Negative
Bacidia	fk_(%)	-0.41602514716892186	0.13899442751587587	Negative
Bacidia	hk/fk	0.27735009811261463	0.3370490579535843	Positive
Bacidia	sh_(%)	-0.13867504905630731	0.6363604104741059	Negative
Bacidia	q4/6	0.13867504905630731	0.6363604104741059	Positive
Bacidia	ph_cacl2	-0.27735009811261463	0.3370490579535843	Negative
Bacidia	p_mg_per_kg	0.13867504905630731	0.6363604104741059	Positive
Bacidia	k_mg_per_kg	-0.27735009811261463	0.3370490579535843	Negative
Bacidia	ca_mg_per_kg	-0.27735009811261463	0.3370490579535843	Negative
Bacidia	mg_mg_per_kg	-0.13867504905630731	0.6363604104741059	Negative
Bacidia	ph_cacl2_status	0.07337993857053429	0.8031294212066562	Positive
Bacidia	p_mg_per_kg_status	0.29351975428213717	0.3084311092607553	Positive
Bacidia	k_mg_per_kg_status	0.32025630761017426	0.2642960660107213	Positive
Bacidia	ca_mg_per_kg_status	0.0	1.0	Negative
Bacidia	mg_mg_per_kg_status	0.1729581738875903	0.5543200094038623	Positive
Bacillicladium	cox_(%)	0.2052502364784706	0.4814789503624287	Positive
Bacillicladium	humus_(%)	0.2052502364784706	0.4814789503624287	Positive
Bacillicladium	hl_(%)	0.14793410181646138	0.6137666463227784	Positive
Bacillicladium	hk_(%)	0.07396705090823069	0.8015827570166417	Positive
Bacillicladium	fk_(%)	0.14793410181646138	0.6137666463227784	Positive
Bacillicladium	hk/fk	-0.33285172908703814	0.24489422005029432	Negative
Bacillicladium	sh_(%)	-0.06163920909019225	0.8341925367574063	Negative
Bacillicladium	q4/6	0.11095057636234604	0.7057252198509845	Positive
Bacillicladium	ph_cacl2	0.3944909381772304	0.16276846234823011	Positive
Bacillicladium	p_mg_per_kg	0.40681877999526883	0.14885490187939918	Positive
Bacillicladium	k_mg_per_kg	0.38216309635919193	0.17750682742256305	Positive
Bacillicladium	ca_mg_per_kg	0.246556836360769	0.39546195538384565	Positive
Bacillicladium	mg_mg_per_kg	0.35750741272311504	0.20949994856361015	Positive
Bacillicladium	ph_cacl2_status	-0.07827936876641306	0.7902435917997939	Negative
Bacillicladium	p_mg_per_kg_status	-0.21526826410763591	0.45984786472764616	Negative
Bacillicladium	k_mg_per_kg_status	-0.1494671386356041	0.610055642845772	Negative
Bacillicladium	ca_mg_per_kg_status	0.22831482556870478	0.4324046079302347	Positive
Bacillicladium	mg_mg_per_kg_status	-0.10762864093670328	0.7141933972666568	Negative
Bagliettoa	cox_(%)	0.20989507868443238	0.4713904819118111	Positive
Bagliettoa	humus_(%)	0.20989507868443238	0.4713904819118111	Positive
Bagliettoa	hl_(%)	-0.13867504905630731	0.6363604104741059	Negative
Bagliettoa	hk_(%)	-0.27735009811261463	0.3370490579535843	Negative
Bagliettoa	fk_(%)	-0.13867504905630731	0.6363604104741059	Negative
Bagliettoa	hk/fk	-0.27735009811261463	0.3370490579535843	Negative
Bagliettoa	sh_(%)	-0.27735009811261463	0.3370490579535843	Negative
Bagliettoa	q4/6	0.0	1.0	Negative
Bagliettoa	ph_cacl2	-0.41602514716892186	0.13899442751587587	Negative
Bagliettoa	p_mg_per_kg	-0.41602514716892186	0.13899442751587587	Negative
Bagliettoa	k_mg_per_kg	0.0	1.0	Negative
Bagliettoa	ca_mg_per_kg	-0.41602514716892186	0.13899442751587587	Negative
Bagliettoa	mg_mg_per_kg	-0.41602514716892186	0.13899442751587587	Negative
Bagliettoa	ph_cacl2_status	0.07337993857053429	0.8031294212066562	Positive
Bagliettoa	p_mg_per_kg_status	-0.07337993857053429	0.8031294212066562	Negative
Bagliettoa	k_mg_per_kg_status	-0.2401922307076307	0.4081582068554265	Negative
Bagliettoa	ca_mg_per_kg_status	0.0	1.0	Negative
Bagliettoa	mg_mg_per_kg_status	-0.3459163477751806	0.22571361240397014	Negative
Bambusicola	cox_(%)	-0.18702535404432774	0.5220232330161205	Negative
Bambusicola	humus_(%)	-0.18702535404432774	0.5220232330161205	Negative
Bambusicola	hl_(%)	-0.21805642673609268	0.45391306826013034	Negative
Bambusicola	hk_(%)	-0.32708464010413896	0.2536669175434305	Negative
Bambusicola	fk_(%)	-0.21805642673609268	0.45391306826013034	Negative
Bambusicola	hk/fk	-0.3925015681249668	0.1650906948933765	Negative
Bambusicola	sh_(%)	-0.2834733547569205	0.3260427414573789	Negative
Bambusicola	q4/6	0.5015297814930132	0.06767729848047004	Positive
Bambusicola	ph_cacl2	0.5160668766087526	0.05887657004242199	Positive
Bambusicola	p_mg_per_kg	0.5015297814930132	0.06767729848047004	Positive
Bambusicola	k_mg_per_kg	0.17444514138887413	0.5508664460004657	Positive
Bambusicola	ca_mg_per_kg	0.29801044987266	0.30073936099636894	Positive
Bambusicola	mg_mg_per_kg	0.2834733547569205	0.3260427414573789	Positive
Bambusicola	ph_cacl2_status	-0.43076923076923085	0.12412955584045603	Negative
Bambusicola	p_mg_per_kg_status	-0.5384615384615384	0.04697614585955521	Negative
Bambusicola	k_mg_per_kg_status	0.0881264556722277	0.7644981957524002	Positive
Bambusicola	ca_mg_per_kg_status	0.038461538461538464	0.8961396559649237	Positive
Bambusicola	mg_mg_per_kg_status	-0.2175713172881685	0.4549429517753415	Negative
Barriopsis	cox_(%)	0.20989507868443238	0.4713904819118111	Positive
Barriopsis	humus_(%)	0.20989507868443238	0.4713904819118111	Positive
Barriopsis	hl_(%)	-0.13867504905630731	0.6363604104741059	Negative
Barriopsis	hk_(%)	-0.27735009811261463	0.3370490579535843	Negative
Barriopsis	fk_(%)	-0.13867504905630731	0.6363604104741059	Negative
Barriopsis	hk/fk	-0.27735009811261463	0.3370490579535843	Negative
Barriopsis	sh_(%)	-0.27735009811261463	0.3370490579535843	Negative
Barriopsis	q4/6	0.0	1.0	Negative
Barriopsis	ph_cacl2	-0.41602514716892186	0.13899442751587587	Negative
Barriopsis	p_mg_per_kg	-0.41602514716892186	0.13899442751587587	Negative
Barriopsis	k_mg_per_kg	0.0	1.0	Negative
Barriopsis	ca_mg_per_kg	-0.41602514716892186	0.13899442751587587	Negative
Barriopsis	mg_mg_per_kg	-0.41602514716892186	0.13899442751587587	Negative
Barriopsis	ph_cacl2_status	0.07337993857053429	0.8031294212066562	Positive
Barriopsis	p_mg_per_kg_status	-0.07337993857053429	0.8031294212066562	Negative
Barriopsis	k_mg_per_kg_status	-0.2401922307076307	0.4081582068554265	Negative
Barriopsis	ca_mg_per_kg_status	0.0	1.0	Negative
Barriopsis	mg_mg_per_kg_status	-0.3459163477751806	0.22571361240397014	Negative
Bartalinia	cox_(%)	-0.07571614679303232	0.7969790341564515	Negative
Bartalinia	humus_(%)	-0.07571614679303232	0.7969790341564515	Negative
Bartalinia	hl_(%)	-0.14451582791529274	0.6220721298201635	Negative
Bartalinia	hk_(%)	-0.07225791395764637	0.8060870955654338	Negative
Bartalinia	fk_(%)	-0.14451582791529274	0.6220721298201635	Negative
Bartalinia	hk/fk	0.2445652472412647	0.3994123297668407	Positive
Bartalinia	sh_(%)	-0.005558301073665107	0.9849542800297953	Negative
Bartalinia	q4/6	-0.11672432254696721	0.6910825075446709	Negative
Bartalinia	ph_cacl2	-0.4502223869668736	0.10621777723528818	Negative
Bartalinia	p_mg_per_kg	-0.4001976773038876	0.1562258942359294	Negative
Bartalinia	k_mg_per_kg	-0.3001482579779157	0.29711706062508436	Negative
Bartalinia	ca_mg_per_kg	-0.3168231611989111	0.26973926442145174	Negative
Bartalinia	mg_mg_per_kg	-0.366847870861897	0.19698201459090064	Negative
Bartalinia	ph_cacl2_status	0.12941176470588234	0.659262429627868	Positive
Bartalinia	p_mg_per_kg_status	0.23235294117647057	0.42408127895041636	Positive
Bartalinia	k_mg_per_kg_status	0.06739081904346823	0.8189442886472378	Positive
Bartalinia	ca_mg_per_kg_status	-0.1764705882352941	0.5461770906180359	Negative
Bartalinia	mg_mg_per_kg_status	0.034662097116987624	0.9063562404892774	Positive
Battarrea	cox_(%)	-0.5422692542049051	0.04514235981067997	Negative
Battarrea	humus_(%)	-0.5422692542049051	0.04514235981067997	Negative
Battarrea	hl_(%)	-0.27796849374791294	0.3359282133727064	Negative
Battarrea	hk_(%)	-0.4571037452743458	0.10033204357315345	Negative
Battarrea	fk_(%)	-0.27796849374791294	0.3359282133727064	Negative
Battarrea	hk/fk	-0.09883324222148017	0.7367602562803817	Negative
Battarrea	sh_(%)	0.08030200930495263	0.7849382166709175	Positive
Battarrea	q4/6	0.27796849374791294	0.3359282133727064	Positive
Battarrea	ph_cacl2	0.6177077638842511	0.018573959007227154	Positive
Battarrea	p_mg_per_kg	0.19766648444296034	0.49816684972682557	Positive
Battarrea	k_mg_per_kg	-0.09883324222148017	0.7367602562803817	Negative
Battarrea	ca_mg_per_kg	0.42004127944129066	0.1348331493633526	Positive
Battarrea	mg_mg_per_kg	0.16060401860990525	0.5833620355987701	Positive
Battarrea	ph_cacl2_status	-0.5491251783869152	0.04197324942225664	Negative
Battarrea	p_mg_per_kg_status	-0.5164391558638847	0.058662620229768425	Negative
Battarrea	k_mg_per_kg_status	0.27460798269450243	0.3420442466100342	Positive
Battarrea	ca_mg_per_kg_status	0.26148818018424536	0.36650665232810054	Positive
Battarrea	mg_mg_per_kg_status	0.323575114464717	0.2590971558606808	Positive
Baudoinia	cox_(%)	0.10259783520851543	0.7270759201810885	Positive
Baudoinia	humus_(%)	0.10259783520851543	0.7270759201810885	Positive
Baudoinia	hl_(%)	-0.33276323999094104	0.24502741138514675	Negative
Baudoinia	hk_(%)	-0.44368431998792146	0.11202587264715266	Negative
Baudoinia	fk_(%)	-0.33276323999094104	0.24502741138514675	Negative
Baudoinia	hk/fk	-0.4298191849882989	0.12505344110611222	Negative
Baudoinia	sh_(%)	-0.4529277433210032	0.10387622984083719	Negative
Baudoinia	q4/6	0.3235198166578594	0.2591832721725056	Positive
Baudoinia	ph_cacl2	-0.004621711666540849	0.9874893274791263	Negative
Baudoinia	p_mg_per_kg	-0.08319080999773526	0.7773759863902376	Negative
Baudoinia	k_mg_per_kg	0.19873360166125648	0.4958026615033151	Positive
Baudoinia	ca_mg_per_kg	-0.023108558332704244	0.9375000498324043	Negative
Baudoinia	mg_mg_per_kg	-0.018486846666163397	0.9499840222959164	Negative
Baudoinia	ph_cacl2_status	-0.3692825709736115	0.1937990312880097	Negative
Baudoinia	p_mg_per_kg_status	-0.39618395031605996	0.16080909774327498	Negative
Baudoinia	k_mg_per_kg_status	-0.24281952920627153	0.40289188965735645	Negative
Baudoinia	ca_mg_per_kg_status	-0.11005109731001667	0.7080150662930135	Negative
Baudoinia	mg_mg_per_kg_status	-0.32856437033638547	0.25139813655449017	Negative
Beauveria	cox_(%)	-0.06841674549282353	0.816230514733816	Negative
Beauveria	humus_(%)	-0.06841674549282353	0.816230514733816	Negative
Beauveria	hl_(%)	0.18491762727057676	0.526808170961694	Positive
Beauveria	hk_(%)	0.0986227345443076	0.7373028709888905	Positive
Beauveria	fk_(%)	0.18491762727057676	0.526808170961694	Positive
Beauveria	hk/fk	0.1972454690886152	0.49910103557808105	Positive
Beauveria	sh_(%)	0.1972454690886152	0.49910103557808105	Positive
Beauveria	q4/6	-0.27121251999684587	0.3482861990885996	Negative
Beauveria	ph_cacl2	-0.28354036181488435	0.32592343471830765	Negative
Beauveria	p_mg_per_kg	-0.5054415145395765	0.06522245214561237	Negative
Beauveria	k_mg_per_kg	-0.22190115272469207	0.44579130255393706	Negative
Beauveria	ca_mg_per_kg	-0.13560625999842293	0.6439153293357192	Negative
Beauveria	mg_mg_per_kg	-0.30819604545096124	0.28370946111247375	Negative
Beauveria	ph_cacl2_status	0.15003545680229172	0.608682125367762	Positive
Beauveria	p_mg_per_kg_status	0.12394233388015403	0.6729177604296294	Positive
Beauveria	k_mg_per_kg_status	-0.04982237954520137	0.8656855783780608	Negative
Beauveria	ca_mg_per_kg_status	-0.19569842191603268	0.5025406862736179	Negative
Beauveria	mg_mg_per_kg_status	0.0	1.0	Negative
Bensingtonia	cox_(%)	-0.16793201166420318	0.5660610637748782	Negative
Bensingtonia	humus_(%)	-0.16793201166420318	0.5660610637748782	Negative
Bensingtonia	hl_(%)	-0.1232784181803845	0.6745818280790026	Negative
Bensingtonia	hk_(%)	-0.22190115272469207	0.44579130255393706	Negative
Bensingtonia	fk_(%)	-0.1232784181803845	0.6745818280790026	Negative
Bensingtonia	hk/fk	-0.28354036181488435	0.32592343471830765	Negative
Bensingtonia	sh_(%)	-0.18491762727057676	0.526808170961694	Negative
Bensingtonia	q4/6	0.38216309635919193	0.17750682742256305	Positive
Bensingtonia	ph_cacl2	0.5424250399936917	0.04506846521728012	Positive
Bensingtonia	p_mg_per_kg	0.30819604545096124	0.28370946111247375	Positive
Bensingtonia	k_mg_per_kg	0.23422899454273055	0.4202422733483926	Positive
Bensingtonia	ca_mg_per_kg	0.493113672721538	0.07318104657642494	Positive
Bensingtonia	mg_mg_per_kg	0.40681877999526883	0.14885490187939918	Positive
Bensingtonia	ph_cacl2_status	-0.5479555813648914	0.042501983886822824	Negative
Bensingtonia	p_mg_per_kg_status	-0.5283857391732881	0.052090057466683395	Negative
Bensingtonia	k_mg_per_kg_status	-0.04982237954520137	0.8656855783780608	Negative
Bensingtonia	ca_mg_per_kg_status	-0.16308201826336055	0.5774877140840994	Negative
Bensingtonia	mg_mg_per_kg_status	-0.10762864093670328	0.7141933972666568	Negative
Berkleasmium	cox_(%)	0.03382765488796594	0.9086018870992005	Positive
Berkleasmium	humus_(%)	0.03382765488796594	0.9086018870992005	Positive
Berkleasmium	hl_(%)	-0.2402572089938749	0.4080275328403614	Negative
Berkleasmium	hk_(%)	-0.2626067168072586	0.3643850499819462	Negative
Berkleasmium	fk_(%)	-0.2402572089938749	0.4080275328403614	Negative
Berkleasmium	hk/fk	0.02793688476672964	0.9244722608349182	Positive
Berkleasmium	sh_(%)	-0.18997081641376154	0.5153691873613531	Negative
Berkleasmium	q4/6	-0.07263590039349706	0.8050904462918154	Negative
Berkleasmium	ph_cacl2	-0.7207716269816247	0.003632374692088572	Negative
Berkleasmium	p_mg_per_kg	-0.5028639258011335	0.06683276040425626	Negative
Berkleasmium	k_mg_per_kg	-0.3631795019674853	0.2018401964689234	Negative
Berkleasmium	ca_mg_per_kg	-0.7207716269816247	0.003632374692088572	Negative
Berkleasmium	mg_mg_per_kg	-0.7207716269816247	0.003632374692088572	Negative
Berkleasmium	ph_cacl2_status	0.3193086938341046	0.26579187262492776	Positive
Berkleasmium	p_mg_per_kg_status	0.21878558651596056	0.452367218812028	Positive
Berkleasmium	k_mg_per_kg_status	0.045162230233094555	0.8781590086735107	Positive
Berkleasmium	ca_mg_per_kg_status	0.0	1.0	Negative
Berkleasmium	mg_mg_per_kg_status	-0.2369352361686757	0.4147358276626001	Negative
Beverwykella	cox_(%)	-0.04400596565748888	0.881258066137161	Negative
Beverwykella	humus_(%)	-0.04400596565748888	0.881258066137161	Negative
Beverwykella	hl_(%)	0.0654169280208278	0.8241708918866163	Positive
Beverwykella	hk_(%)	-0.04361128534721853	0.882316264822782	Negative
Beverwykella	fk_(%)	0.0654169280208278	0.8241708918866163	Positive
Beverwykella	hk/fk	-0.10902821336804634	0.7106218591260346	Negative
Beverwykella	sh_(%)	0.18898223650461363	0.5175981987378706	Positive
Beverwykella	q4/6	-0.0654169280208278	0.8241708918866163	Negative
Beverwykella	ph_cacl2	0.32708464010413896	0.2536669175434305	Positive
Beverwykella	p_mg_per_kg	0.21805642673609268	0.45391306826013034	Positive
Beverwykella	k_mg_per_kg	0.07995402313656731	0.7858503710438625	Positive
Beverwykella	ca_mg_per_kg	0.10902821336804634	0.7106218591260346	Positive
Beverwykella	mg_mg_per_kg	0.09449111825230681	0.7479754712371746	Positive
Beverwykella	ph_cacl2_status	0.019230769230769232	0.947973779706964	Positive
Beverwykella	p_mg_per_kg_status	-0.08846153846153847	0.7636259264033068	Negative
Beverwykella	k_mg_per_kg_status	0.0881264556722277	0.7644981957524002	Positive
Beverwykella	ca_mg_per_kg_status	0.5384615384615384	0.04697614585955521	Positive
Beverwykella	mg_mg_per_kg_status	0.25383320350286326	0.38120477846764866	Positive
Biatora	cox_(%)	0.20989507868443238	0.4713904819118111	Positive
Biatora	humus_(%)	0.20989507868443238	0.4713904819118111	Positive
Biatora	hl_(%)	-0.13867504905630731	0.6363604104741059	Negative
Biatora	hk_(%)	-0.27735009811261463	0.3370490579535843	Negative
Biatora	fk_(%)	-0.13867504905630731	0.6363604104741059	Negative
Biatora	hk/fk	-0.27735009811261463	0.3370490579535843	Negative
Biatora	sh_(%)	-0.27735009811261463	0.3370490579535843	Negative
Biatora	q4/6	0.0	1.0	Negative
Biatora	ph_cacl2	-0.41602514716892186	0.13899442751587587	Negative
Biatora	p_mg_per_kg	-0.41602514716892186	0.13899442751587587	Negative
Biatora	k_mg_per_kg	0.0	1.0	Negative
Biatora	ca_mg_per_kg	-0.41602514716892186	0.13899442751587587	Negative
Biatora	mg_mg_per_kg	-0.41602514716892186	0.13899442751587587	Negative
Biatora	ph_cacl2_status	0.07337993857053429	0.8031294212066562	Positive
Biatora	p_mg_per_kg_status	-0.07337993857053429	0.8031294212066562	Negative
Biatora	k_mg_per_kg_status	-0.2401922307076307	0.4081582068554265	Negative
Biatora	ca_mg_per_kg_status	0.0	1.0	Negative
Biatora	mg_mg_per_kg_status	-0.3459163477751806	0.22571361240397014	Negative
Bipolaris	cox_(%)	0.19710935322871626	0.4994032342039476	Positive
Bipolaris	humus_(%)	0.19710935322871626	0.4994032342039476	Positive
Bipolaris	hl_(%)	0.10654992034286538	0.7169498811534455	Positive
Bipolaris	hk_(%)	-0.15982488051429805	0.5852140354973465	Negative
Bipolaris	fk_(%)	0.10654992034286538	0.7169498811534455	Positive
Bipolaris	hk/fk	-0.6526182621000504	0.011406332586486042	Negative
Bipolaris	sh_(%)	-0.1775832005714423	0.5436084868521388	Negative
Bipolaris	q4/6	0.24861648080001925	0.3913982596790322	Positive
Bipolaris	ph_cacl2	0.6348599420429062	0.014720346346437008	Positive
Bipolaris	p_mg_per_kg	0.38624346124288694	0.17253655879265078	Positive
Bipolaris	k_mg_per_kg	0.5549475017857572	0.039412688822097315	Positive
Bipolaris	ca_mg_per_kg	0.4128809413286033	0.14231151536789782	Positive
Bipolaris	mg_mg_per_kg	0.43063926138574754	0.12425567276883114	Positive
Bipolaris	ph_cacl2_status	-0.3547299442298794	0.21331640484507516	Negative
Bipolaris	p_mg_per_kg_status	-0.5943488469546986	0.024994995382127506	Negative
Bipolaris	k_mg_per_kg_status	-0.3050199332440956	0.28895765024528686	Negative
Bipolaris	ca_mg_per_kg_status	0.29365061608433723	0.3082053839163325	Positive
Bipolaris	mg_mg_per_kg_status	-0.23255942296478338	0.4236578813949702	Negative
Bisporella	cox_(%)	0.0	1.0	Negative
Bisporella	humus_(%)	0.0	1.0	Negative
Bisporella	hl_(%)	0.13867504905630731	0.6363604104741059	Positive
Bisporella	hk_(%)	0.13867504905630731	0.6363604104741059	Positive
Bisporella	fk_(%)	0.13867504905630731	0.6363604104741059	Positive
Bisporella	hk/fk	0.13867504905630731	0.6363604104741059	Positive
Bisporella	sh_(%)	0.13867504905630731	0.6363604104741059	Positive
Bisporella	q4/6	-0.13867504905630731	0.6363604104741059	Negative
Bisporella	ph_cacl2	0.13867504905630731	0.6363604104741059	Positive
Bisporella	p_mg_per_kg	-0.27735009811261463	0.3370490579535843	Negative
Bisporella	k_mg_per_kg	0.13867504905630731	0.6363604104741059	Positive
Bisporella	ca_mg_per_kg	0.41602514716892186	0.13899442751587587	Positive
Bisporella	mg_mg_per_kg	0.27735009811261463	0.3370490579535843	Positive
Bisporella	ph_cacl2_status	-0.29351975428213717	0.3084311092607553	Negative
Bisporella	p_mg_per_kg_status	-0.07337993857053429	0.8031294212066562	Negative
Bisporella	k_mg_per_kg_status	-0.2401922307076307	0.4081582068554265	Negative
Bisporella	ca_mg_per_kg_status	-0.3668996928526714	0.1969139218336417	Negative
Bisporella	mg_mg_per_kg_status	0.1729581738875903	0.5543200094038623	Positive
Blastenia	cox_(%)	0.0	1.0	Negative
Blastenia	humus_(%)	0.0	1.0	Negative
Blastenia	hl_(%)	0.20351933162035318	0.4852643156885843	Positive
Blastenia	hk_(%)	0.20351933162035318	0.4852643156885843	Positive
Blastenia	fk_(%)	0.20351933162035318	0.4852643156885843	Positive
Blastenia	hk/fk	0.20351933162035318	0.4852643156885843	Positive
Blastenia	sh_(%)	0.20351933162035318	0.4852643156885843	Positive
Blastenia	q4/6	-0.20351933162035318	0.4852643156885843	Negative
Blastenia	ph_cacl2	0.20351933162035318	0.4852643156885843	Positive
Blastenia	p_mg_per_kg	-0.40703866324070637	0.1486141440865914	Negative
Blastenia	k_mg_per_kg	0.20351933162035318	0.4852643156885843	Positive
Blastenia	ca_mg_per_kg	0.6105579948610594	0.02038833655949962	Positive
Blastenia	mg_mg_per_kg	0.40703866324070637	0.1486141440865914	Positive
Blastenia	ph_cacl2_status	-0.43076923076923085	0.12412955584045603	Negative
Blastenia	p_mg_per_kg_status	-0.10769230769230771	0.714030808726249	Negative
Blastenia	k_mg_per_kg_status	-0.3525058226889108	0.21640370611157558	Negative
Blastenia	ca_mg_per_kg_status	-0.5384615384615384	0.04697614585955521	Negative
Blastenia	mg_mg_per_kg_status	0.25383320350286326	0.38120477846764866	Positive
Blumeria	cox_(%)	-0.04391326286724073	0.8815066001072369	Negative
Blumeria	humus_(%)	-0.04391326286724073	0.8815066001072369	Negative
Blumeria	hl_(%)	0.17407765595569788	0.5517190949055957	Positive
Blumeria	hk_(%)	0.08703882797784894	0.7673312334681347	Positive
Blumeria	fk_(%)	0.17407765595569788	0.5517190949055957	Positive
Blumeria	hk/fk	0.17407765595569788	0.5517190949055957	Positive
Blumeria	sh_(%)	0.17407765595569788	0.5517190949055957	Positive
Blumeria	q4/6	-0.26111648393354675	0.3672131505480314	Negative
Blumeria	ph_cacl2	-0.26111648393354675	0.3672131505480314	Negative
Blumeria	p_mg_per_kg	-0.5222329678670935	0.055404621898728114	Negative
Blumeria	k_mg_per_kg	-0.17407765595569788	0.5517190949055957	Negative
Blumeria	ca_mg_per_kg	-0.08703882797784894	0.7673312334681347	Negative
Blumeria	mg_mg_per_kg	-0.26111648393354675	0.3672131505480314	Negative
Blumeria	ph_cacl2_status	0.09211323729436766	0.7541371116212632	Positive
Blumeria	p_mg_per_kg_status	0.09211323729436766	0.7541371116212632	Positive
Blumeria	k_mg_per_kg_status	-0.10050378152592121	0.7324582539321675	Negative
Blumeria	ca_mg_per_kg_status	-0.23028309323591914	0.42833741931653646	Negative
Blumeria	mg_mg_per_kg_status	0.0	1.0	Negative
Boeremia	cox_(%)	0.00454029804402663	0.987709693574804	Positive
Boeremia	humus_(%)	0.00454029804402663	0.987709693574804	Positive
Boeremia	hl_(%)	-0.18448265944498	0.5277980438107226	Negative
Boeremia	hk_(%)	-0.24747673827985117	0.393644253381498	Negative
Boeremia	fk_(%)	-0.18448265944498	0.5277980438107226	Negative
Boeremia	hk/fk	-0.27897377769728676	0.3341105848182112	Negative
Boeremia	sh_(%)	-0.21148012180278192	0.4679711666035008	Negative
Boeremia	q4/6	0.23847758416058387	0.41161424425329707	Positive
Boeremia	ph_cacl2	0.16198477414681167	0.5800858450001902	Positive
Boeremia	p_mg_per_kg	0.21597969886241558	0.4583299543882353	Positive
Boeremia	k_mg_per_kg	0.11698900355047509	0.690413610601464	Positive
Boeremia	ca_mg_per_kg	0.008999154119267317	0.9756422963717274	Positive
Boeremia	mg_mg_per_kg	0.053994924715603895	0.8545418048280765	Positive
Boeremia	ph_cacl2_status	-0.15952380952380954	0.5859303117098302	Negative
Boeremia	p_mg_per_kg_status	-0.2404761904761905	0.4075873114708135	Negative
Boeremia	k_mg_per_kg_status	0.0	1.0	Negative
Boeremia	ca_mg_per_kg_status	0.16666666666666666	0.5690331249007401	Positive
Boeremia	mg_mg_per_kg_status	-0.12346308877860354	0.6741188223515584	Negative
Boletus	cox_(%)	0.05735131331032769	0.8455959346923364	Positive
Boletus	humus_(%)	0.05735131331032769	0.8455959346923364	Positive
Boletus	hl_(%)	0.13735594163370524	0.639603891293988	Positive
Boletus	hk_(%)	-0.03789129424378076	0.8976721084041548	Negative
Boletus	fk_(%)	0.13735594163370524	0.639603891293988	Positive
Boletus	hk/fk	-0.4120678249011157	0.14317784472855738	Negative
Boletus	sh_(%)	0.056836941365671134	0.8469658083022057	Positive
Boletus	q4/6	0.14682876519465043	0.6164476700681385	Positive
Boletus	ph_cacl2	0.7625622966560877	0.0015168376010480892	Positive
Boletus	p_mg_per_kg	0.5399509429738758	0.04625250305934335	Positive
Boletus	k_mg_per_kg	0.4499591191448965	0.10644756245721801	Positive
Boletus	ca_mg_per_kg	0.5067960605105677	0.06438743294896568	Positive
Boletus	mg_mg_per_kg	0.5257417076324579	0.05349630728733122	Positive
Boletus	ph_cacl2_status	-0.2832089095211533	0.326513829388413	Negative
Boletus	p_mg_per_kg_status	-0.4285727745851081	0.12627256728721867	Negative
Boletus	k_mg_per_kg_status	-0.09570990157570684	0.7448227095494974	Negative
Boletus	ca_mg_per_kg_status	0.47619197176123124	0.0851942799663017	Positive
Boletus	mg_mg_per_kg_status	0.10633218075125038	0.7175066669031672	Positive
Bonordeniella	cox_(%)	0.30804175960242214	0.28396309822283977	Positive
Bonordeniella	humus_(%)	0.30804175960242214	0.28396309822283977	Positive
Bonordeniella	hl_(%)	-0.20351933162035318	0.4852643156885843	Negative
Bonordeniella	hk_(%)	-0.40703866324070637	0.1486141440865914	Negative
Bonordeniella	fk_(%)	-0.20351933162035318	0.4852643156885843	Negative
Bonordeniella	hk/fk	-0.40703866324070637	0.1486141440865914	Negative
Bonordeniella	sh_(%)	-0.40703866324070637	0.1486141440865914	Negative
Bonordeniella	q4/6	0.0	1.0	Negative
Bonordeniella	ph_cacl2	-0.6105579948610594	0.02038833655949962	Negative
Bonordeniella	p_mg_per_kg	-0.6105579948610594	0.02038833655949962	Negative
Bonordeniella	k_mg_per_kg	0.0	1.0	Negative
Bonordeniella	ca_mg_per_kg	-0.6105579948610594	0.02038833655949962	Negative
Bonordeniella	mg_mg_per_kg	-0.6105579948610594	0.02038833655949962	Negative
Bonordeniella	ph_cacl2_status	0.10769230769230771	0.714030808726249	Positive
Bonordeniella	p_mg_per_kg_status	-0.10769230769230771	0.714030808726249	Negative
Bonordeniella	k_mg_per_kg_status	-0.3525058226889108	0.21640370611157558	Negative
Bonordeniella	ca_mg_per_kg_status	0.0	1.0	Negative
Bonordeniella	mg_mg_per_kg_status	-0.5076664070057265	0.06385495568303835	Negative
Botryobambusa	cox_(%)	0.0	1.0	Negative
Botryobambusa	humus_(%)	0.0	1.0	Negative
Botryobambusa	hl_(%)	0.13867504905630731	0.6363604104741059	Positive
Botryobambusa	hk_(%)	0.13867504905630731	0.6363604104741059	Positive
Botryobambusa	fk_(%)	0.13867504905630731	0.6363604104741059	Positive
Botryobambusa	hk/fk	0.13867504905630731	0.6363604104741059	Positive
Botryobambusa	sh_(%)	0.13867504905630731	0.6363604104741059	Positive
Botryobambusa	q4/6	-0.13867504905630731	0.6363604104741059	Negative
Botryobambusa	ph_cacl2	0.13867504905630731	0.6363604104741059	Positive
Botryobambusa	p_mg_per_kg	-0.27735009811261463	0.3370490579535843	Negative
Botryobambusa	k_mg_per_kg	0.13867504905630731	0.6363604104741059	Positive
Botryobambusa	ca_mg_per_kg	0.41602514716892186	0.13899442751587587	Positive
Botryobambusa	mg_mg_per_kg	0.27735009811261463	0.3370490579535843	Positive
Botryobambusa	ph_cacl2_status	-0.29351975428213717	0.3084311092607553	Negative
Botryobambusa	p_mg_per_kg_status	-0.07337993857053429	0.8031294212066562	Negative
Botryobambusa	k_mg_per_kg_status	-0.2401922307076307	0.4081582068554265	Negative
Botryobambusa	ca_mg_per_kg_status	-0.3668996928526714	0.1969139218336417	Negative
Botryobambusa	mg_mg_per_kg_status	0.1729581738875903	0.5543200094038623	Positive
Botryobasidium	cox_(%)	-0.6179143806533247	0.018523412819376927	Negative
Botryobasidium	humus_(%)	-0.6179143806533247	0.018523412819376927	Negative
Botryobasidium	hl_(%)	-0.4082482904638631	0.1472942950870102	Negative
Botryobasidium	hk_(%)	-0.6123724356957945	0.01991573637878305	Negative
Botryobasidium	fk_(%)	-0.4082482904638631	0.1472942950870102	Negative
Botryobasidium	hk/fk	-0.20412414523193154	0.4839400434753175	Negative
Botryobasidium	sh_(%)	0.0	1.0	Negative
Botryobasidium	q4/6	0.4082482904638631	0.1472942950870102	Positive
Botryobasidium	ph_cacl2	0.6123724356957945	0.01991573637878305	Positive
Botryobasidium	p_mg_per_kg	0.4082482904638631	0.1472942950870102	Positive
Botryobasidium	k_mg_per_kg	-0.20412414523193154	0.4839400434753175	Negative
Botryobasidium	ca_mg_per_kg	0.20412414523193154	0.4839400434753175	Positive
Botryobasidium	mg_mg_per_kg	0.0	1.0	Negative
Botryobasidium	ph_cacl2_status	-0.4320493798938574	0.12289197933651226	Negative
Botryobasidium	p_mg_per_kg_status	-0.5400617248673216	0.0461990055142095	Negative
Botryobasidium	k_mg_per_kg_status	0.4714045207910317	0.08882971407652301	Positive
Botryobasidium	ca_mg_per_kg_status	0.5400617248673216	0.0461990055142095	Positive
Botryobasidium	mg_mg_per_kg_status	0.2545875386086578	0.3797426309998979	Positive
Botryohypoxylon	cox_(%)	0.0	1.0	Negative
Botryohypoxylon	humus_(%)	0.0	1.0	Negative
Botryohypoxylon	hl_(%)	0.20351933162035318	0.4852643156885843	Positive
Botryohypoxylon	hk_(%)	0.20351933162035318	0.4852643156885843	Positive
Botryohypoxylon	fk_(%)	0.20351933162035318	0.4852643156885843	Positive
Botryohypoxylon	hk/fk	0.20351933162035318	0.4852643156885843	Positive
Botryohypoxylon	sh_(%)	0.20351933162035318	0.4852643156885843	Positive
Botryohypoxylon	q4/6	-0.20351933162035318	0.4852643156885843	Negative
Botryohypoxylon	ph_cacl2	0.20351933162035318	0.4852643156885843	Positive
Botryohypoxylon	p_mg_per_kg	-0.40703866324070637	0.1486141440865914	Negative
Botryohypoxylon	k_mg_per_kg	0.20351933162035318	0.4852643156885843	Positive
Botryohypoxylon	ca_mg_per_kg	0.6105579948610594	0.02038833655949962	Positive
Botryohypoxylon	mg_mg_per_kg	0.40703866324070637	0.1486141440865914	Positive
Botryohypoxylon	ph_cacl2_status	-0.43076923076923085	0.12412955584045603	Negative
Botryohypoxylon	p_mg_per_kg_status	-0.10769230769230771	0.714030808726249	Negative
Botryohypoxylon	k_mg_per_kg_status	-0.3525058226889108	0.21640370611157558	Negative
Botryohypoxylon	ca_mg_per_kg_status	-0.5384615384615384	0.04697614585955521	Negative
Botryohypoxylon	mg_mg_per_kg_status	0.25383320350286326	0.38120477846764866	Positive
Botryosphaeria	cox_(%)	0.16322382874082	0.5771522730525454	Positive
Botryosphaeria	humus_(%)	0.16322382874082	0.5771522730525454	Positive
Botryosphaeria	hl_(%)	0.20797702499433818	0.47554411561018306	Positive
Botryosphaeria	hk_(%)	0.02773026999924509	0.9250294102916577	Positive
Botryosphaeria	fk_(%)	0.20797702499433818	0.47554411561018306	Positive
Botryosphaeria	hk/fk	-0.09705594499735781	0.7413450625674939	Negative
Botryosphaeria	sh_(%)	0.013865134999622546	0.9624786693063747	Positive
Botryosphaeria	q4/6	-0.19873360166125648	0.4958026615033151	Negative
Botryosphaeria	ph_cacl2	-0.09705594499735781	0.7413450625674939	Negative
Botryosphaeria	p_mg_per_kg	-0.6377962099826371	0.014127146018084156	Negative
Botryosphaeria	k_mg_per_kg	0.1802467549950931	0.5374806535040669	Positive
Botryosphaeria	ca_mg_per_kg	0.19873360166125648	0.4958026615033151	Positive
Botryosphaeria	mg_mg_per_kg	0.0	1.0	Negative
Botryosphaeria	ph_cacl2_status	-0.23233009432114632	0.42412814036202906	Negative
Botryosphaeria	p_mg_per_kg_status	-0.19075523533736222	0.5136035965509465	Negative
Botryosphaeria	k_mg_per_kg_status	-0.48563905841254307	0.0783289347488981	Negative
Botryosphaeria	ca_mg_per_kg_status	-0.4279764895389537	0.12685862876617326	Negative
Botryosphaeria	mg_mg_per_kg_status	-0.14410717997209888	0.623067861552769	Negative
Botryotrichum	cox_(%)	-0.5060686050611222	0.0648349211100653	Negative
Botryotrichum	humus_(%)	-0.5060686050611222	0.0648349211100653	Negative
Botryotrichum	hl_(%)	0.029074190231479023	0.9214060290497026	Positive
Botryotrichum	hk_(%)	-0.0654169280208278	0.8241708918866163	Negative
Botryotrichum	fk_(%)	0.029074190231479023	0.9214060290497026	Positive
Botryotrichum	hk/fk	0.23259352185183219	0.42358798119959806	Positive
Botryotrichum	sh_(%)	0.32708464010413896	0.2536669175434305	Positive
Botryotrichum	q4/6	-0.029074190231479023	0.9214060290497026	Negative
Botryotrichum	ph_cacl2	0.17444514138887413	0.5508664460004657	Positive
Botryotrichum	p_mg_per_kg	0.07995402313656731	0.7858503710438625	Positive
Botryotrichum	k_mg_per_kg	-0.42157575835644584	0.13326552083734988	Negative
Botryotrichum	ca_mg_per_kg	-0.014537095115739512	0.9606614860960225	Negative
Botryotrichum	mg_mg_per_kg	-0.21805642673609268	0.45391306826013034	Negative
Botryotrichum	ph_cacl2_status	0.08846153846153847	0.7636259264033068	Positive
Botryotrichum	p_mg_per_kg_status	-0.019230769230769232	0.947973779706964	Negative
Botryotrichum	k_mg_per_kg_status	0.4700077635852144	0.08991047235586964	Positive
Botryotrichum	ca_mg_per_kg_status	0.25	0.38868097867816664	Positive
Botryotrichum	mg_mg_per_kg_status	0.25383320350286326	0.38120477846764866	Positive
Botrytis	cox_(%)	-0.17700284322293847	0.5449476622573604	Negative
Botrytis	humus_(%)	-0.17700284322293847	0.5449476622573604	Negative
Botrytis	hl_(%)	-0.33236591060745735	0.24562600425473116	Negative
Botrytis	hk_(%)	-0.4385383542737285	0.11674737141125392	Negative
Botrytis	fk_(%)	-0.33236591060745735	0.24562600425473116	Negative
Botrytis	hk/fk	0.023080966014406762	0.9375745441176377	Positive
Botrytis	sh_(%)	-0.13386960288355923	0.6482049912541493	Negative
Botrytis	q4/6	-0.009232386405762705	0.9750111915787771	Negative
Botrytis	ph_cacl2	-0.4385383542737285	0.11674737141125392	Negative
Botrytis	p_mg_per_kg	-0.6001051163745758	0.023277872252625946	Negative
Botrytis	k_mg_per_kg	-0.3369821038103387	0.2387263750369741	Negative
Botrytis	ca_mg_per_kg	-0.38314403583915224	0.17630360153107186	Negative
Botrytis	mg_mg_per_kg	-0.5585593775486436	0.03788314830179925	Negative
Botrytis	ph_cacl2_status	-0.06839447562444442	0.8162894026302533	Negative
Botrytis	p_mg_per_kg_status	-0.04885319687460315	0.8682774080811897	Negative
Botrytis	k_mg_per_kg_status	0.018656122718204087	0.9495265764210311	Positive
Botrytis	ca_mg_per_kg_status	-0.07327979531190473	0.8033933014570163	Negative
Botrytis	mg_mg_per_kg_status	-0.04605923572356445	0.8757559403258921	Negative
Brachyalara	cox_(%)	0.0	1.0	Negative
Brachyalara	humus_(%)	0.0	1.0	Negative
Brachyalara	hl_(%)	0.20351933162035318	0.4852643156885843	Positive
Brachyalara	hk_(%)	0.20351933162035318	0.4852643156885843	Positive
Brachyalara	fk_(%)	0.20351933162035318	0.4852643156885843	Positive
Brachyalara	hk/fk	0.20351933162035318	0.4852643156885843	Positive
Brachyalara	sh_(%)	0.20351933162035318	0.4852643156885843	Positive
Brachyalara	q4/6	-0.20351933162035318	0.4852643156885843	Negative
Brachyalara	ph_cacl2	0.20351933162035318	0.4852643156885843	Positive
Brachyalara	p_mg_per_kg	-0.40703866324070637	0.1486141440865914	Negative
Brachyalara	k_mg_per_kg	0.20351933162035318	0.4852643156885843	Positive
Brachyalara	ca_mg_per_kg	0.6105579948610594	0.02038833655949962	Positive
Brachyalara	mg_mg_per_kg	0.40703866324070637	0.1486141440865914	Positive
Brachyalara	ph_cacl2_status	-0.43076923076923085	0.12412955584045603	Negative
Brachyalara	p_mg_per_kg_status	-0.10769230769230771	0.714030808726249	Negative
Brachyalara	k_mg_per_kg_status	-0.3525058226889108	0.21640370611157558	Negative
Brachyalara	ca_mg_per_kg_status	-0.5384615384615384	0.04697614585955521	Negative
Brachyalara	mg_mg_per_kg_status	0.25383320350286326	0.38120477846764866	Positive
Briansuttonomyces	cox_(%)	0.018079384588222745	0.9510851924973152	Positive
Briansuttonomyces	humus_(%)	0.018079384588222745	0.9510851924973152	Positive
Briansuttonomyces	hl_(%)	-0.2015688866153811	0.4895464958515148	Negative
Briansuttonomyces	hk_(%)	-0.3986584646393093	0.1579732052471345	Negative
Briansuttonomyces	fk_(%)	-0.2015688866153811	0.4895464958515148	Negative
Briansuttonomyces	hk/fk	-0.47480671069400887	0.08623528010541495	Negative
Briansuttonomyces	sh_(%)	-0.3269895271760627	0.25381317020645777	Negative
Briansuttonomyces	q4/6	0.3001136756273452	0.29717545448456656	Positive
Briansuttonomyces	ph_cacl2	0.06271032028034079	0.8313486186055227	Positive
Briansuttonomyces	p_mg_per_kg	0.11646202337777574	0.6917455918825128	Positive
Briansuttonomyces	k_mg_per_kg	0.08062755464615244	0.7840851172451102	Positive
Briansuttonomyces	ca_mg_per_kg	-0.17917234365811655	0.5399488370155976	Negative
Briansuttonomyces	mg_mg_per_kg	-0.1702137264752107	0.5607181705365745	Negative
Briansuttonomyces	ph_cacl2_status	-0.11140068383789464	0.7045802270127635	Negative
Briansuttonomyces	p_mg_per_kg_status	-0.37212568856488215	0.19012382626000202	Negative
Briansuttonomyces	k_mg_per_kg_status	-0.0362058202948224	0.9022035063522472	Negative
Briansuttonomyces	ca_mg_per_kg_status	0.21332045841298974	0.46401615254720907	Positive
Briansuttonomyces	mg_mg_per_kg_status	-0.368720837734695	0.19453048068185855	Negative
Brunneochlamydosporium	cox_(%)	-0.5318978854080616	0.05026378793311135	Negative
Brunneochlamydosporium	humus_(%)	-0.5318978854080616	0.05026378793311135	Negative
Brunneochlamydosporium	hl_(%)	0.24969192841039234	0.38928517714883437	Positive
Brunneochlamydosporium	hk_(%)	0.17755870464739013	0.5436649824646389	Positive
Brunneochlamydosporium	fk_(%)	0.24969192841039234	0.38928517714883437	Positive
Brunneochlamydosporium	hk/fk	0.4771890187398609	0.08445049102384532	Positive
Brunneochlamydosporium	sh_(%)	0.5493222425028632	0.0418846406250722	Positive
Brunneochlamydosporium	q4/6	-0.24969192841039234	0.38928517714883437	Negative
Brunneochlamydosporium	ph_cacl2	0.14426644752600445	0.6226797110650298	Positive
Brunneochlamydosporium	p_mg_per_kg	-0.17755870464739013	0.5436649824646389	Negative
Brunneochlamydosporium	k_mg_per_kg	-0.4549941806589372	0.1021118229206621	Negative
Brunneochlamydosporium	ca_mg_per_kg	0.16646128560692824	0.569516136766988	Positive
Brunneochlamydosporium	mg_mg_per_kg	-0.14426644752600445	0.6226797110650298	Negative
Brunneochlamydosporium	ph_cacl2_status	0.08221083073205848	0.7799393330666842	Positive
Brunneochlamydosporium	p_mg_per_kg_status	0.09395523512235256	0.7493628622345354	Positive
Brunneochlamydosporium	k_mg_per_kg_status	0.3812223232840844	0.17866575789776387	Positive
Brunneochlamydosporium	ca_mg_per_kg_status	-0.02936101097573517	0.92063290478432	Negative
Brunneochlamydosporium	mg_mg_per_kg_status	0.38754557265078654	0.17096968247414712	Positive
Brunneomurispora	cox_(%)	-0.41979015736886477	0.13509086839354473	Negative
Brunneomurispora	humus_(%)	-0.41979015736886477	0.13509086839354473	Negative
Brunneomurispora	hl_(%)	-0.27735009811261463	0.3370490579535843	Negative
Brunneomurispora	hk_(%)	-0.41602514716892186	0.13899442751587587	Negative
Brunneomurispora	fk_(%)	-0.27735009811261463	0.3370490579535843	Negative
Brunneomurispora	hk/fk	-0.13867504905630731	0.6363604104741059	Negative
Brunneomurispora	sh_(%)	0.0	1.0	Negative
Brunneomurispora	q4/6	0.27735009811261463	0.3370490579535843	Positive
Brunneomurispora	ph_cacl2	0.41602514716892186	0.13899442751587587	Positive
Brunneomurispora	p_mg_per_kg	0.27735009811261463	0.3370490579535843	Positive
Brunneomurispora	k_mg_per_kg	-0.13867504905630731	0.6363604104741059	Negative
Brunneomurispora	ca_mg_per_kg	0.13867504905630731	0.6363604104741059	Positive
Brunneomurispora	mg_mg_per_kg	0.0	1.0	Negative
Brunneomurispora	ph_cacl2_status	-0.29351975428213717	0.3084311092607553	Negative
Brunneomurispora	p_mg_per_kg_status	-0.3668996928526714	0.1969139218336417	Negative
Brunneomurispora	k_mg_per_kg_status	0.32025630761017426	0.2642960660107213	Positive
Brunneomurispora	ca_mg_per_kg_status	0.3668996928526714	0.1969139218336417	Positive
Brunneomurispora	mg_mg_per_kg_status	0.1729581738875903	0.5543200094038623	Positive
Brycekendrickomyces	cox_(%)	0.0	1.0	Negative
Brycekendrickomyces	humus_(%)	0.0	1.0	Negative
Brycekendrickomyces	hl_(%)	0.13867504905630731	0.6363604104741059	Positive
Brycekendrickomyces	hk_(%)	0.13867504905630731	0.6363604104741059	Positive
Brycekendrickomyces	fk_(%)	0.13867504905630731	0.6363604104741059	Positive
Brycekendrickomyces	hk/fk	0.13867504905630731	0.6363604104741059	Positive
Brycekendrickomyces	sh_(%)	0.13867504905630731	0.6363604104741059	Positive
Brycekendrickomyces	q4/6	-0.13867504905630731	0.6363604104741059	Negative
Brycekendrickomyces	ph_cacl2	0.13867504905630731	0.6363604104741059	Positive
Brycekendrickomyces	p_mg_per_kg	-0.27735009811261463	0.3370490579535843	Negative
Brycekendrickomyces	k_mg_per_kg	0.13867504905630731	0.6363604104741059	Positive
Brycekendrickomyces	ca_mg_per_kg	0.41602514716892186	0.13899442751587587	Positive
Brycekendrickomyces	mg_mg_per_kg	0.27735009811261463	0.3370490579535843	Positive
Brycekendrickomyces	ph_cacl2_status	-0.29351975428213717	0.3084311092607553	Negative
Brycekendrickomyces	p_mg_per_kg_status	-0.07337993857053429	0.8031294212066562	Negative
Brycekendrickomyces	k_mg_per_kg_status	-0.2401922307076307	0.4081582068554265	Negative
Brycekendrickomyces	ca_mg_per_kg_status	-0.3668996928526714	0.1969139218336417	Negative
Brycekendrickomyces	mg_mg_per_kg_status	0.1729581738875903	0.5543200094038623	Positive
Bryochiton	cox_(%)	0.04400596565748888	0.881258066137161	Positive
Bryochiton	humus_(%)	0.04400596565748888	0.881258066137161	Positive
Bryochiton	hl_(%)	0.13810240359952536	0.6377677174252858	Positive
Bryochiton	hk_(%)	0.04361128534721853	0.882316264822782	Positive
Bryochiton	fk_(%)	0.13810240359952536	0.6377677174252858	Positive
Bryochiton	hk/fk	-0.09449111825230681	0.7479754712371746	Negative
Bryochiton	sh_(%)	0.21805642673609268	0.45391306826013034	Positive
Bryochiton	q4/6	-0.13810240359952536	0.6377677174252858	Negative
Bryochiton	ph_cacl2	0.2834733547569205	0.3260427414573789	Positive
Bryochiton	p_mg_per_kg	0.18898223650461363	0.5175981987378706	Positive
Bryochiton	k_mg_per_kg	0.12356530848378583	0.6738625834029411	Positive
Bryochiton	ca_mg_per_kg	0.09449111825230681	0.7479754712371746	Positive
Bryochiton	mg_mg_per_kg	0.10902821336804634	0.7106218591260346	Positive
Bryochiton	ph_cacl2_status	0.08846153846153847	0.7636259264033068	Positive
Bryochiton	p_mg_per_kg_status	-0.019230769230769232	0.947973779706964	Negative
Bryochiton	k_mg_per_kg_status	0.0293754852240759	0.9205938912227659	Positive
Bryochiton	ca_mg_per_kg_status	0.5384615384615384	0.04697614585955521	Positive
Bryochiton	mg_mg_per_kg_status	0.25383320350286326	0.38120477846764866	Positive
Bryoplaca	cox_(%)	-0.41979015736886477	0.13509086839354473	Negative
Bryoplaca	humus_(%)	-0.41979015736886477	0.13509086839354473	Negative
Bryoplaca	hl_(%)	-0.27735009811261463	0.3370490579535843	Negative
Bryoplaca	hk_(%)	-0.41602514716892186	0.13899442751587587	Negative
Bryoplaca	fk_(%)	-0.27735009811261463	0.3370490579535843	Negative
Bryoplaca	hk/fk	-0.13867504905630731	0.6363604104741059	Negative
Bryoplaca	sh_(%)	0.0	1.0	Negative
Bryoplaca	q4/6	0.27735009811261463	0.3370490579535843	Positive
Bryoplaca	ph_cacl2	0.41602514716892186	0.13899442751587587	Positive
Bryoplaca	p_mg_per_kg	0.27735009811261463	0.3370490579535843	Positive
Bryoplaca	k_mg_per_kg	-0.13867504905630731	0.6363604104741059	Negative
Bryoplaca	ca_mg_per_kg	0.13867504905630731	0.6363604104741059	Positive
Bryoplaca	mg_mg_per_kg	0.0	1.0	Negative
Bryoplaca	ph_cacl2_status	-0.29351975428213717	0.3084311092607553	Negative
Bryoplaca	p_mg_per_kg_status	-0.3668996928526714	0.1969139218336417	Negative
Bryoplaca	k_mg_per_kg_status	0.32025630761017426	0.2642960660107213	Positive
Bryoplaca	ca_mg_per_kg_status	0.3668996928526714	0.1969139218336417	Positive
Bryoplaca	mg_mg_per_kg_status	0.1729581738875903	0.5543200094038623	Positive
Bryoria	cox_(%)	0.3300447424311666	0.24914071122411735	Positive
Bryoria	humus_(%)	0.3300447424311666	0.24914071122411735	Positive
Bryoria	hl_(%)	0.42157575835644584	0.13326552083734988	Positive
Bryoria	hk_(%)	0.42157575835644584	0.13326552083734988	Positive
Bryoria	fk_(%)	0.42157575835644584	0.13326552083734988	Positive
Bryoria	hk/fk	0.09449111825230681	0.7479754712371746	Positive
Bryoria	sh_(%)	0.3125475449883995	0.27661075148052977	Positive
Bryoria	q4/6	-0.42157575835644584	0.13326552083734988	Negative
Bryoria	ph_cacl2	0.09449111825230681	0.7479754712371746	Positive
Bryoria	p_mg_per_kg	-0.18898223650461363	0.5175981987378706	Negative
Bryoria	k_mg_per_kg	0.3125475449883995	0.27661075148052977	Positive
Bryoria	ca_mg_per_kg	0.2834733547569205	0.3260427414573789	Positive
Bryoria	mg_mg_per_kg	0.29801044987266	0.30073936099636894	Positive
Bryoria	ph_cacl2_status	0.08846153846153847	0.7636259264033068	Positive
Bryoria	p_mg_per_kg_status	0.1807692307692308	0.5362821821445537	Positive
Bryoria	k_mg_per_kg_status	-0.3525058226889108	0.21640370611157558	Negative
Bryoria	ca_mg_per_kg_status	0.038461538461538464	0.8961396559649237	Positive
Bryoria	mg_mg_per_kg_status	0.25383320350286326	0.38120477846764866	Positive
Buckleyzyma	cox_(%)	-0.10939577482483087	0.7096847982617339	Negative
Buckleyzyma	humus_(%)	-0.10939577482483087	0.7096847982617339	Negative
Buckleyzyma	hl_(%)	-0.1445528359737702	0.6219819837875676	Negative
Buckleyzyma	hk_(%)	-0.30975607708665037	0.2811523442089096	Negative
Buckleyzyma	fk_(%)	-0.1445528359737702	0.6219819837875676	Negative
Buckleyzyma	hk/fk	-0.5678861413255256	0.03413608334134997	Negative
Buckleyzyma	sh_(%)	-0.27878046937798534	0.33445967229667195	Negative
Buckleyzyma	q4/6	0.5472357361864156	0.04282981791263792	Positive
Buckleyzyma	ph_cacl2	0.7640649901470709	0.001465328070553112	Positive
Buckleyzyma	p_mg_per_kg	0.7330893824384058	0.002853928601994963	Positive
Buckleyzyma	k_mg_per_kg	0.3613820899344254	0.20424800363950402	Positive
Buckleyzyma	ca_mg_per_kg	0.43365850792131044	0.12134825925238941	Positive
Buckleyzyma	mg_mg_per_kg	0.46463411562997553	0.09415397463259899	Positive
Buckleyzyma	ph_cacl2_status	-0.46986819364901156	0.09001896833696814	Negative
Buckleyzyma	p_mg_per_kg_status	-0.6610936212968651	0.01004308898520394	Negative
Buckleyzyma	k_mg_per_kg_status	0.04172880938079001	0.8873659557979212	Positive
Buckleyzyma	ca_mg_per_kg_status	0.24586126411866885	0.396839306183263	Positive
Buckleyzyma	mg_mg_per_kg_status	-0.21892243263110578	0.4520773875477415	Negative
Budhanggurabania	cox_(%)	0.0	1.0	Negative
Budhanggurabania	humus_(%)	0.0	1.0	Negative
Budhanggurabania	hl_(%)	0.20412414523193154	0.4839400434753175	Positive
Budhanggurabania	hk_(%)	0.20412414523193154	0.4839400434753175	Positive
Budhanggurabania	fk_(%)	0.20412414523193154	0.4839400434753175	Positive
Budhanggurabania	hk/fk	0.20412414523193154	0.4839400434753175	Positive
Budhanggurabania	sh_(%)	0.20412414523193154	0.4839400434753175	Positive
Budhanggurabania	q4/6	-0.20412414523193154	0.4839400434753175	Negative
Budhanggurabania	ph_cacl2	0.20412414523193154	0.4839400434753175	Positive
Budhanggurabania	p_mg_per_kg	-0.4082482904638631	0.1472942950870102	Negative
Budhanggurabania	k_mg_per_kg	0.20412414523193154	0.4839400434753175	Positive
Budhanggurabania	ca_mg_per_kg	0.6123724356957945	0.01991573637878305	Positive
Budhanggurabania	mg_mg_per_kg	0.4082482904638631	0.1472942950870102	Positive
Budhanggurabania	ph_cacl2_status	-0.4320493798938574	0.12289197933651226	Negative
Budhanggurabania	p_mg_per_kg_status	-0.10801234497346435	0.7132136866738148	Negative
Budhanggurabania	k_mg_per_kg_status	-0.3535533905932738	0.21494612068098035	Negative
Budhanggurabania	ca_mg_per_kg_status	-0.5400617248673216	0.0461990055142095	Negative
Budhanggurabania	mg_mg_per_kg_status	0.2545875386086578	0.3797426309998979	Positive
Buellia	cox_(%)	-0.3370999312316211	0.2385518343856967	Negative
Buellia	humus_(%)	-0.3370999312316211	0.2385518343856967	Negative
Buellia	hl_(%)	-0.08908708063747481	0.7619982468793183	Negative
Buellia	hk_(%)	-0.2672612419124244	0.3556283996419388	Negative
Buellia	fk_(%)	-0.08908708063747481	0.7619982468793183	Negative
Buellia	hk/fk	-0.1113588507968435	0.7046866183146443	Negative
Buellia	sh_(%)	0.20044593143431827	0.49201991505555187	Positive
Buellia	q4/6	0.08908708063747481	0.7619982468793183	Positive
Buellia	ph_cacl2	0.6013377943029549	0.022921992645934988	Positive
Buellia	p_mg_per_kg	0.222717701593687	0.44407570524769924	Positive
Buellia	k_mg_per_kg	0.022271770159368702	0.9397594357633154	Positive
Buellia	ca_mg_per_kg	0.37862009270926783	0.1818968205626181	Positive
Buellia	mg_mg_per_kg	0.20044593143431827	0.49201991505555187	Positive
Buellia	ph_cacl2_status	-0.3417682775734979	0.23169941356703894	Negative
Buellia	p_mg_per_kg_status	-0.36533850361304954	0.19897184942191348	Negative
Buellia	k_mg_per_kg_status	0.1800205749557739	0.5379998345206024	Positive
Buellia	ca_mg_per_kg_status	0.4714045207910316	0.08882971407652308	Positive
Buellia	mg_mg_per_kg_status	0.38888888888888895	0.16936294451767142	Positive
Bullera	cox_(%)	0.08934350362952097	0.7613312903593084	Positive
Bullera	humus_(%)	0.08934350362952097	0.7613312903593084	Positive
Bullera	hl_(%)	0.07378516701261942	0.8020618323962221	Positive
Bullera	hk_(%)	-0.08854220041514328	0.763415990454574	Negative
Bullera	fk_(%)	0.07378516701261942	0.8020618323962221	Positive
Bullera	hk/fk	-0.5164961690883357	0.05862990407430054	Negative
Bullera	sh_(%)	-0.08854220041514328	0.763415990454574	Negative
Bullera	q4/6	0.28038363464795374	0.33157075757385646	Positive
Bullera	ph_cacl2	0.7230946367236701	0.0034741086799644767	Positive
Bullera	p_mg_per_kg	0.6788235365160986	0.007598873906418037	Positive
Bullera	k_mg_per_kg	0.45746803547824033	0.10002688880576982	Positive
Bullera	ca_mg_per_kg	0.3984399018681448	0.15822235403446122	Positive
Bullera	mg_mg_per_kg	0.48698210228328814	0.07738566685878709	Positive
Bullera	ph_cacl2_status	-0.24206933092733937	0.4043920118099128	Negative
Bullera	p_mg_per_kg_status	-0.4607125975713879	0.09733729460428117	Negative
Bullera	k_mg_per_kg_status	-0.05963984045171223	0.8395061004342702	Negative
Bullera	ca_mg_per_kg_status	0.46852128566581813	0.09107069925260464	Positive
Bullera	mg_mg_per_kg_status	-0.07362101738323103	0.8024942518877692	Negative
Cadophora	cox_(%)	-0.3326052654818661	0.24526529990327306	Negative
Cadophora	humus_(%)	-0.3326052654818661	0.24526529990327306	Negative
Cadophora	hl_(%)	-0.770603247514157	0.001257162575211075	Negative
Cadophora	hk_(%)	-0.8062380797691469	0.000496142814061367	Negative
Cadophora	fk_(%)	-0.770603247514157	0.001257162575211075	Negative
Cadophora	hk/fk	-0.2271720556255607	0.4347748793501761	Negative
Cadophora	sh_(%)	-0.4587984652829951	0.09891788184997007	Negative
Cadophora	q4/6	0.494433297537985	0.07229777841374589	Positive
Cadophora	ph_cacl2	-0.05790660241435861	0.844117545787238	Negative
Cadophora	p_mg_per_kg	0.01336306209562122	0.9638365371436228	Positive
Cadophora	k_mg_per_kg	-0.2271720556255607	0.4347748793501761	Negative
Cadophora	ca_mg_per_kg	-0.23608076368930822	0.4164704238281546	Negative
Cadophora	mg_mg_per_kg	-0.28953301207179305	0.31535332989451703	Negative
Cadophora	ph_cacl2_status	-0.41483597829610785	0.14024284654969188	Negative
Cadophora	p_mg_per_kg_status	-0.3535533905932737	0.21494612068098043	Negative
Cadophora	k_mg_per_kg_status	0.23402674744250604	0.4206552806188386	Positive
Cadophora	ca_mg_per_kg_status	0.1296362432175337	0.6587040502668708	Positive
Cadophora	mg_mg_per_kg_status	-0.055555555555555546	0.8503801303969717	Negative
Calcarisporium	cox_(%)	0.20989507868443238	0.4713904819118111	Positive
Calcarisporium	humus_(%)	0.20989507868443238	0.4713904819118111	Positive
Calcarisporium	hl_(%)	-0.13867504905630731	0.6363604104741059	Negative
Calcarisporium	hk_(%)	-0.27735009811261463	0.3370490579535843	Negative
Calcarisporium	fk_(%)	-0.13867504905630731	0.6363604104741059	Negative
Calcarisporium	hk/fk	-0.27735009811261463	0.3370490579535843	Negative
Calcarisporium	sh_(%)	-0.27735009811261463	0.3370490579535843	Negative
Calcarisporium	q4/6	0.0	1.0	Negative
Calcarisporium	ph_cacl2	-0.41602514716892186	0.13899442751587587	Negative
Calcarisporium	p_mg_per_kg	-0.41602514716892186	0.13899442751587587	Negative
Calcarisporium	k_mg_per_kg	0.0	1.0	Negative
Calcarisporium	ca_mg_per_kg	-0.41602514716892186	0.13899442751587587	Negative
Calcarisporium	mg_mg_per_kg	-0.41602514716892186	0.13899442751587587	Negative
Calcarisporium	ph_cacl2_status	0.07337993857053429	0.8031294212066562	Positive
Calcarisporium	p_mg_per_kg_status	-0.07337993857053429	0.8031294212066562	Negative
Calcarisporium	k_mg_per_kg_status	-0.2401922307076307	0.4081582068554265	Negative
Calcarisporium	ca_mg_per_kg_status	0.0	1.0	Negative
Calcarisporium	mg_mg_per_kg_status	-0.3459163477751806	0.22571361240397014	Negative
Caliciopsis	cox_(%)	-0.41979015736886477	0.13509086839354473	Negative
Caliciopsis	humus_(%)	-0.41979015736886477	0.13509086839354473	Negative
Caliciopsis	hl_(%)	-0.27735009811261463	0.3370490579535843	Negative
Caliciopsis	hk_(%)	-0.41602514716892186	0.13899442751587587	Negative
Caliciopsis	fk_(%)	-0.27735009811261463	0.3370490579535843	Negative
Caliciopsis	hk/fk	-0.13867504905630731	0.6363604104741059	Negative
Caliciopsis	sh_(%)	0.0	1.0	Negative
Caliciopsis	q4/6	0.27735009811261463	0.3370490579535843	Positive
Caliciopsis	ph_cacl2	0.41602514716892186	0.13899442751587587	Positive
Caliciopsis	p_mg_per_kg	0.27735009811261463	0.3370490579535843	Positive
Caliciopsis	k_mg_per_kg	-0.13867504905630731	0.6363604104741059	Negative
Caliciopsis	ca_mg_per_kg	0.13867504905630731	0.6363604104741059	Positive
Caliciopsis	mg_mg_per_kg	0.0	1.0	Negative
Caliciopsis	ph_cacl2_status	-0.29351975428213717	0.3084311092607553	Negative
Caliciopsis	p_mg_per_kg_status	-0.3668996928526714	0.1969139218336417	Negative
Caliciopsis	k_mg_per_kg_status	0.32025630761017426	0.2642960660107213	Positive
Caliciopsis	ca_mg_per_kg_status	0.3668996928526714	0.1969139218336417	Positive
Caliciopsis	mg_mg_per_kg_status	0.1729581738875903	0.5543200094038623	Positive
Calicium	cox_(%)	0.41979015736886477	0.13509086839354473	Positive
Calicium	humus_(%)	0.41979015736886477	0.13509086839354473	Positive
Calicium	hl_(%)	0.41602514716892186	0.13899442751587587	Positive
Calicium	hk_(%)	0.41602514716892186	0.13899442751587587	Positive
Calicium	fk_(%)	0.41602514716892186	0.13899442751587587	Positive
Calicium	hk/fk	0.0	1.0	Negative
Calicium	sh_(%)	0.27735009811261463	0.3370490579535843	Positive
Calicium	q4/6	-0.41602514716892186	0.13899442751587587	Negative
Calicium	ph_cacl2	0.0	1.0	Negative
Calicium	p_mg_per_kg	0.0	1.0	Negative
Calicium	k_mg_per_kg	0.27735009811261463	0.3370490579535843	Positive
Calicium	ca_mg_per_kg	0.0	1.0	Negative
Calicium	mg_mg_per_kg	0.13867504905630731	0.6363604104741059	Positive
Calicium	ph_cacl2_status	0.3668996928526714	0.1969139218336417	Positive
Calicium	p_mg_per_kg_status	0.29351975428213717	0.3084311092607553	Positive
Calicium	k_mg_per_kg_status	-0.2401922307076307	0.4081582068554265	Negative
Calicium	ca_mg_per_kg_status	0.3668996928526714	0.1969139218336417	Positive
Calicium	mg_mg_per_kg_status	0.1729581738875903	0.5543200094038623	Positive
Calocera	cox_(%)	-0.37792744489520164	0.1827631422374931	Negative
Calocera	humus_(%)	-0.37792744489520164	0.1827631422374931	Negative
Calocera	hl_(%)	-0.2718867664913161	0.34704174655083275	Negative
Calocera	hk_(%)	-0.43834805209824435	0.11692453279454088	Negative
Calocera	fk_(%)	-0.2718867664913161	0.34704174655083275	Negative
Calocera	hk/fk	-0.35511740929478025	0.21278140273522694	Negative
Calocera	sh_(%)	-0.18865612368785198	0.5183344541597656	Negative
Calocera	q4/6	0.5215786949017084	0.05576583092602392	Positive
Calocera	ph_cacl2	0.7268809471502532	0.0032278211171533617	Positive
Calocera	p_mg_per_kg	0.46054289017916805	0.09747671771992454	Positive
Calocera	k_mg_per_kg	0.14426644752600445	0.6226797110650298	Positive
Calocera	ca_mg_per_kg	0.5160299853814775	0.05889780205978927	Positive
Calocera	mg_mg_per_kg	0.371763537855473	0.1905894715730054	Positive
Calocera	ph_cacl2_status	-0.6576866458564679	0.010575087063451914	Negative
Calocera	p_mg_per_kg_status	-0.69291985902735	0.006007869397006736	Negative
Calocera	k_mg_per_kg_status	0.13454905527673566	0.6465254804019793	Positive
Calocera	ca_mg_per_kg_status	0.05872202195147034	0.8419474572108239	Positive
Calocera	mg_mg_per_kg_status	-0.02768182661791332	0.9251600454876459	Negative
Calonectria	cox_(%)	0.16405529986605555	0.5751871030003852	Positive
Calonectria	humus_(%)	0.16405529986605555	0.5751871030003852	Positive
Calonectria	hl_(%)	-0.07126966450997983	0.8086941350588396	Negative
Calonectria	hk_(%)	-0.3741657386773941	0.18751436718832618	Negative
Calonectria	fk_(%)	-0.07126966450997983	0.8086941350588396	Negative
Calonectria	hk/fk	-0.6948792289723034	0.0058090876681138	Negative
Calonectria	sh_(%)	-0.2939873661036668	0.30762495549340574	Negative
Calonectria	q4/6	0.2717155959442981	0.34735744196729057	Positive
Calonectria	ph_cacl2	0.3162591362630355	0.27063985130334944	Positive
Calonectria	p_mg_per_kg	0.23162640965743445	0.4255727619508437	Positive
Calonectria	k_mg_per_kg	0.33853090642240424	0.23643833711133494	Positive
Calonectria	ca_mg_per_kg	-0.0044543540318737395	0.9879423231735455	Negative
Calonectria	mg_mg_per_kg	0.0222717701593687	0.9397594357633154	Positive
Calonectria	ph_cacl2_status	-0.17677669529663684	0.5454698838299874	Negative
Calonectria	p_mg_per_kg_status	-0.5256160406820003	0.053563821057017034	Negative
Calonectria	k_mg_per_kg_status	-0.19802263245135127	0.4973772285910356	Negative
Calonectria	ca_mg_per_kg_status	0.43604918173170426	0.1190791421307308	Positive
Calonectria	mg_mg_per_kg_status	-0.3555555555555555	0.21217743533702146	Negative
Calophoma	cox_(%)	-0.41979015736886477	0.13509086839354473	Negative
Calophoma	humus_(%)	-0.41979015736886477	0.13509086839354473	Negative
Calophoma	hl_(%)	-0.27735009811261463	0.3370490579535843	Negative
Calophoma	hk_(%)	-0.41602514716892186	0.13899442751587587	Negative
Calophoma	fk_(%)	-0.27735009811261463	0.3370490579535843	Negative
Calophoma	hk/fk	-0.13867504905630731	0.6363604104741059	Negative
Calophoma	sh_(%)	0.0	1.0	Negative
Calophoma	q4/6	0.27735009811261463	0.3370490579535843	Positive
Calophoma	ph_cacl2	0.41602514716892186	0.13899442751587587	Positive
Calophoma	p_mg_per_kg	0.27735009811261463	0.3370490579535843	Positive
Calophoma	k_mg_per_kg	-0.13867504905630731	0.6363604104741059	Negative
Calophoma	ca_mg_per_kg	0.13867504905630731	0.6363604104741059	Positive
Calophoma	mg_mg_per_kg	0.0	1.0	Negative
Calophoma	ph_cacl2_status	-0.29351975428213717	0.3084311092607553	Negative
Calophoma	p_mg_per_kg_status	-0.3668996928526714	0.1969139218336417	Negative
Calophoma	k_mg_per_kg_status	0.32025630761017426	0.2642960660107213	Positive
Calophoma	ca_mg_per_kg_status	0.3668996928526714	0.1969139218336417	Positive
Calophoma	mg_mg_per_kg_status	0.1729581738875903	0.5543200094038623	Positive
Caloplaca	cox_(%)	0.058824131615166746	0.8416757843435008	Positive
Caloplaca	humus_(%)	0.058824131615166746	0.8416757843435008	Positive
Caloplaca	hl_(%)	-0.12107745056264207	0.6801082906297612	Negative
Caloplaca	hk_(%)	-0.3408106015837333	0.2330951311044039	Negative
Caloplaca	fk_(%)	-0.12107745056264207	0.6801082906297612	Negative
Caloplaca	hk/fk	-0.54260635252147	0.04498257374405566	Negative
Caloplaca	sh_(%)	-0.29596710137534726	0.3042253652146265	Negative
Caloplaca	q4/6	0.33632625156289464	0.2396993341151636	Positive
Caloplaca	ph_cacl2	0.5157002523964385	0.05908781815210312	Positive
Caloplaca	p_mg_per_kg	0.11210875052096489	0.7027802092134006	Positive
Caloplaca	k_mg_per_kg	0.45291935210469814	0.10388343713267116	Positive
Caloplaca	ca_mg_per_kg	0.4798254522297297	0.08250570851411786	Positive
Caloplaca	mg_mg_per_kg	0.3946228018337964	0.16261529495858565	Positive
Caloplaca	ph_cacl2_status	-0.633562962164793	0.0149883375318523	Negative
Caloplaca	p_mg_per_kg_status	-0.6691563870055117	0.008866193455895628	Negative
Caloplaca	k_mg_per_kg_status	-0.3443424119923317	0.22797345477212383	Negative
Caloplaca	ca_mg_per_kg_status	-0.07118684968143743	0.8089126878941166	Negative
Caloplaca	mg_mg_per_kg_status	-0.2069397836909908	0.4777975460652336	Negative
Calvitimela	cox_(%)	0.41979015736886477	0.13509086839354473	Positive
Calvitimela	humus_(%)	0.41979015736886477	0.13509086839354473	Positive
Calvitimela	hl_(%)	0.41602514716892186	0.13899442751587587	Positive
Calvitimela	hk_(%)	0.41602514716892186	0.13899442751587587	Positive
Calvitimela	fk_(%)	0.41602514716892186	0.13899442751587587	Positive
Calvitimela	hk/fk	0.0	1.0	Negative
Calvitimela	sh_(%)	0.27735009811261463	0.3370490579535843	Positive
Calvitimela	q4/6	-0.41602514716892186	0.13899442751587587	Negative
Calvitimela	ph_cacl2	0.0	1.0	Negative
Calvitimela	p_mg_per_kg	0.0	1.0	Negative
Calvitimela	k_mg_per_kg	0.27735009811261463	0.3370490579535843	Positive
Calvitimela	ca_mg_per_kg	0.0	1.0	Negative
Calvitimela	mg_mg_per_kg	0.13867504905630731	0.6363604104741059	Positive
Calvitimela	ph_cacl2_status	0.3668996928526714	0.1969139218336417	Positive
Calvitimela	p_mg_per_kg_status	0.29351975428213717	0.3084311092607553	Positive
Calvitimela	k_mg_per_kg_status	-0.2401922307076307	0.4081582068554265	Negative
Calvitimela	ca_mg_per_kg_status	0.3668996928526714	0.1969139218336417	Positive
Calvitimela	mg_mg_per_kg_status	0.1729581738875903	0.5543200094038623	Positive
Calycina	cox_(%)	0.2860387767736777	0.32149258838894407	Positive
Calycina	humus_(%)	0.2860387767736777	0.32149258838894407	Positive
Calycina	hl_(%)	0.3925015681249668	0.1650906948933765	Positive
Calycina	hk_(%)	0.3925015681249668	0.1650906948933765	Positive
Calycina	fk_(%)	0.3925015681249668	0.1650906948933765	Positive
Calycina	hk/fk	0.10902821336804634	0.7106218591260346	Positive
Calycina	sh_(%)	0.29801044987266	0.30073936099636894	Positive
Calycina	q4/6	-0.3925015681249668	0.1650906948933765	Negative
Calycina	ph_cacl2	0.10902821336804634	0.7106218591260346	Positive
Calycina	p_mg_per_kg	-0.21805642673609268	0.45391306826013034	Negative
Calycina	k_mg_per_kg	0.29801044987266	0.30073936099636894	Positive
Calycina	ca_mg_per_kg	0.32708464010413896	0.2536669175434305	Positive
Calycina	mg_mg_per_kg	0.3125475449883995	0.27661075148052977	Positive
Calycina	ph_cacl2_status	0.019230769230769232	0.947973779706964	Positive
Calycina	p_mg_per_kg_status	0.1423076923076923	0.6274596892333936	Positive
Calycina	k_mg_per_kg_status	-0.3525058226889108	0.21640370611157558	Negative
Calycina	ca_mg_per_kg_status	-0.038461538461538464	0.8961396559649237	Negative
Calycina	mg_mg_per_kg_status	0.25383320350286326	0.38120477846764866	Positive
Camarosporidiella	cox_(%)	-0.41979015736886477	0.13509086839354473	Negative
Camarosporidiella	humus_(%)	-0.41979015736886477	0.13509086839354473	Negative
Camarosporidiella	hl_(%)	-0.27735009811261463	0.3370490579535843	Negative
Camarosporidiella	hk_(%)	-0.41602514716892186	0.13899442751587587	Negative
Camarosporidiella	fk_(%)	-0.27735009811261463	0.3370490579535843	Negative
Camarosporidiella	hk/fk	-0.13867504905630731	0.6363604104741059	Negative
Camarosporidiella	sh_(%)	0.0	1.0	Negative
Camarosporidiella	q4/6	0.27735009811261463	0.3370490579535843	Positive
Camarosporidiella	ph_cacl2	0.41602514716892186	0.13899442751587587	Positive
Camarosporidiella	p_mg_per_kg	0.27735009811261463	0.3370490579535843	Positive
Camarosporidiella	k_mg_per_kg	-0.13867504905630731	0.6363604104741059	Negative
Camarosporidiella	ca_mg_per_kg	0.13867504905630731	0.6363604104741059	Positive
Camarosporidiella	mg_mg_per_kg	0.0	1.0	Negative
Camarosporidiella	ph_cacl2_status	-0.29351975428213717	0.3084311092607553	Negative
Camarosporidiella	p_mg_per_kg_status	-0.3668996928526714	0.1969139218336417	Negative
Camarosporidiella	k_mg_per_kg_status	0.32025630761017426	0.2642960660107213	Positive
Camarosporidiella	ca_mg_per_kg_status	0.3668996928526714	0.1969139218336417	Positive
Camarosporidiella	mg_mg_per_kg_status	0.1729581738875903	0.5543200094038623	Positive
Candelaria	cox_(%)	-0.13322994607620517	0.6497875553218219	Negative
Candelaria	humus_(%)	-0.13322994607620517	0.6497875553218219	Negative
Candelaria	hl_(%)	-0.6578587685367273	0.010547701003574873	Negative
Candelaria	hk_(%)	-0.6068978780162766	0.021367397505885847	Negative
Candelaria	fk_(%)	-0.6578587685367273	0.010547701003574873	Negative
Candelaria	hk/fk	-0.20384356208180285	0.4845541837023749	Negative
Candelaria	sh_(%)	-0.5235073298919027	0.05470593240093114	Negative
Candelaria	q4/6	0.4586480146840564	0.0990428641782278	Positive
Candelaria	ph_cacl2	-0.15288267156135213	0.6018190497543281	Negative
Candelaria	p_mg_per_kg	-0.013898424687395649	0.9623886398765541	Negative
Candelaria	k_mg_per_kg	-0.08339054812437388	0.7768537856266037	Negative
Candelaria	ca_mg_per_kg	-0.18067952093614342	0.5364878782792304	Negative
Candelaria	mg_mg_per_kg	-0.15288267156135213	0.6018190497543281	Negative
Candelaria	ph_cacl2_status	-0.3873293668979135	0.17122920780553436	Negative
Candelaria	p_mg_per_kg_status	-0.2598538790580939	0.3696185307294475	Negative
Candelaria	k_mg_per_kg_status	0.05616981464205732	0.8487430959655327	Positive
Candelaria	ca_mg_per_kg_status	-0.14708710135363803	0.6158206691922081	Negative
Candelaria	mg_mg_per_kg_status	-0.1849000654084097	0.5268481212061655	Negative
Candelariella	cox_(%)	-0.41979015736886477	0.13509086839354473	Negative
Candelariella	humus_(%)	-0.41979015736886477	0.13509086839354473	Negative
Candelariella	hl_(%)	-0.27735009811261463	0.3370490579535843	Negative
Candelariella	hk_(%)	-0.41602514716892186	0.13899442751587587	Negative
Candelariella	fk_(%)	-0.27735009811261463	0.3370490579535843	Negative
Candelariella	hk/fk	-0.13867504905630731	0.6363604104741059	Negative
Candelariella	sh_(%)	0.0	1.0	Negative
Candelariella	q4/6	0.27735009811261463	0.3370490579535843	Positive
Candelariella	ph_cacl2	0.41602514716892186	0.13899442751587587	Positive
Candelariella	p_mg_per_kg	0.27735009811261463	0.3370490579535843	Positive
Candelariella	k_mg_per_kg	-0.13867504905630731	0.6363604104741059	Negative
Candelariella	ca_mg_per_kg	0.13867504905630731	0.6363604104741059	Positive
Candelariella	mg_mg_per_kg	0.0	1.0	Negative
Candelariella	ph_cacl2_status	-0.29351975428213717	0.3084311092607553	Negative
Candelariella	p_mg_per_kg_status	-0.3668996928526714	0.1969139218336417	Negative
Candelariella	k_mg_per_kg_status	0.32025630761017426	0.2642960660107213	Positive
Candelariella	ca_mg_per_kg_status	0.3668996928526714	0.1969139218336417	Positive
Candelariella	mg_mg_per_kg_status	0.1729581738875903	0.5543200094038623	Positive
Candida	cox_(%)	-0.4094280530289896	0.1460145439255242	Negative
Candida	humus_(%)	-0.4094280530289896	0.1460145439255242	Negative
Candida	hl_(%)	0.08893281717864171	0.7623995603495188	Positive
Candida	hk_(%)	-0.005558301073665107	0.9849542800297953	Negative
Candida	fk_(%)	0.08893281717864171	0.7623995603495188	Positive
Candida	hk/fk	0.2445652472412647	0.3994123297668407	Positive
Candida	sh_(%)	0.3390563654935715	0.2356651484327983	Positive
Candida	q4/6	-0.08893281717864171	0.7623995603495188	Negative
Candida	ph_cacl2	0.3779644730092272	0.18271676270484996	Positive
Candida	p_mg_per_kg	-0.1834239354309485	0.530210857623421	Negative
Candida	k_mg_per_kg	-0.12228262362063234	0.6770803233986185	Negative
Candida	ca_mg_per_kg	0.5002470966298596	0.06849641204146993	Positive
Candida	mg_mg_per_kg	0.1889822365046136	0.5175981987378706	Positive
Candida	ph_cacl2_status	-0.3676470588235294	0.19593356552072602	Negative
Candida	p_mg_per_kg_status	-0.20294117647058824	0.4865318085402869	Negative
Candida	k_mg_per_kg_status	0.08985442539129097	0.7600028417756759	Positive
Candida	ca_mg_per_kg_status	-0.16176470588235292	0.580607510216767	Negative
Candida	mg_mg_per_kg_status	0.38821548771026143	0.1701671651182828	Positive
Candolleomyces	cox_(%)	-0.2772073426267331	0.33730809904993886	Negative
Candolleomyces	humus_(%)	-0.2772073426267331	0.33730809904993886	Negative
Candolleomyces	hl_(%)	-0.044151609840650044	0.8808676180800487	Negative
Candolleomyces	hk_(%)	-0.21094658034977243	0.46912080803016143	Negative
Candolleomyces	fk_(%)	-0.044151609840650044	0.8808676180800487	Negative
Candolleomyces	hk/fk	-0.35811861315193927	0.20866591357372463	Negative
Candolleomyces	sh_(%)	-0.08339748525456118	0.7768356505782776	Negative
Candolleomyces	q4/6	0.4267988951262838	0.1280214216855535	Positive
Candolleomyces	ph_cacl2	0.6917085541701841	0.006133383404347974	Positive
Candolleomyces	p_mg_per_kg	0.652462678756273	0.011432619407316175	Positive
Candolleomyces	k_mg_per_kg	0.13245482952195015	0.6517070983190332	Positive
Candolleomyces	ca_mg_per_kg	0.35811861315193927	0.20866591357372463	Positive
Candolleomyces	mg_mg_per_kg	0.3090612688845504	0.28228955207802314	Positive
Candolleomyces	ph_cacl2_status	-0.31150447899069905	0.27830266182167285	Negative
Candolleomyces	p_mg_per_kg_status	-0.5295576142841883	0.05147543611803362	Negative
Candolleomyces	k_mg_per_kg_status	0.21808918607248962	0.45384356163712114	Positive
Candolleomyces	ca_mg_per_kg_status	0.24660771253430339	0.39536131052083945	Positive
Candolleomyces	mg_mg_per_kg_status	-0.12237051636905873	0.6768596716917772	Negative
Capnobotryella	cox_(%)	0.20989507868443238	0.4713904819118111	Positive
[truncated: 14,363 more rows]

## Sheet: S34
correlation	interaction	name	pval	selected	shared interaction	shared name
0.6600664060208365	Positive	Diplodia (Positive) Trichoderma	0.010201265713719094	false	Positive	Diplodia (Positive) Trichoderma
0.23076923076923075	Positive	Robillarda (Positive) Zopfiella	0.4273358616774501	false	Positive	Robillarda (Positive) Zopfiella
0.5500553383506972	Positive	Harknessia (Positive) Trichoderma	0.04155621228882114	false	Positive	Harknessia (Positive) Trichoderma
0.5032967032967033	Positive	Cladosporium (Positive) Diplodia	0.06656042759911303	false	Positive	Cladosporium (Positive) Diplodia
-0.07301777611028418	Negative	Candolleomyces (Negative) Harknessia	0.8040838213349044	false	Negative	Candolleomyces (Negative) Harknessia
-0.5015954522218498	Negative	Candolleomyces (Negative) Dothiorella	0.06763555050871091	false	Negative	Candolleomyces (Negative) Dothiorella
0.6160619789527808	Positive	Alternaria (Positive) Cladosporium	0.018980319469287268	false	Positive	Alternaria (Positive) Cladosporium
0.3454347524842379	Positive	Trichoderma (Positive) Zopfiella	0.22640360281785218	false	Positive	Trichoderma (Positive) Zopfiella
0.2584925911424978	Positive	Diplodia (Positive) Dothiorella	0.37222140893316047	false	Positive	Diplodia (Positive) Dothiorella
-0.15839698777049713	Negative	Coprinopsis (Negative) Sticta	0.5886142561118424	false	Negative	Coprinopsis (Negative) Sticta
0.6342638238860846	Positive	Diaporthe (Positive) Sticta	0.01484306261765308	false	Positive	Diaporthe (Positive) Sticta
-0.06897068041533849	Negative	Fusarium (Negative) Lasiodiplodia	0.8147660432894234	false	Negative	Fusarium (Negative) Lasiodiplodia
-0.26505707432179426	Negative	Diaporthe (Negative) Filobasidium	0.35976066696719455	false	Negative	Diaporthe (Negative) Filobasidium
-0.18071605929431264	Negative	Dothiorella (Negative) Fusarium	0.5364040951298978	false	Negative	Dothiorella (Negative) Fusarium
-0.6055960425824384	Negative	Psathyrella (Negative) Saccharata	0.021724039367634486	false	Negative	Psathyrella (Negative) Saccharata
-0.3033573139095133	Negative	Candolleomyces (Negative) Trichoderma	0.2917274326858533	false	Negative	Candolleomyces (Negative) Trichoderma
0.47964825504180797	Positive	Alternaria (Positive) Diplodia	0.08263542281872624	false	Positive	Alternaria (Positive) Diplodia
0.36224458368918316	Positive	Dendrostoma (Positive) Saccharata	0.20309035758495933	false	Positive	Dendrostoma (Positive) Saccharata
0.9202308979802677	Positive	Coprinopsis (Positive) Filobasidium	3.1266559291715053E-6	false	Positive	Coprinopsis (Positive) Filobasidium
0.39780219780219783	Positive	Diaporthe (Positive) Robillarda	0.1589507745108348	false	Positive	Diaporthe (Positive) Robillarda
0.3296508151229038	Positive	Filobasidium (Positive) Harknessia	0.24974020727311153	false	Positive	Filobasidium (Positive) Harknessia
0.4681318681318682	Positive	Solicoccozyma (Positive) Zopfiella	0.09137636506833118	false	Positive	Solicoccozyma (Positive) Zopfiella
0.13954024831586165	Positive	Cladosporium (Positive) Dothiorella	0.634236298639919	false	Positive	Cladosporium (Positive) Dothiorella
0.5648351648351648	Positive	Cladosporium (Positive) Harknessia	0.03533018486755279	false	Positive	Cladosporium (Positive) Harknessia
0.7802197802197802	Positive	Fusarium (Positive) Harknessia	9.944938002309496E-4	false	Positive	Fusarium (Positive) Harknessia
0.0770077473690976	Positive	Cladosporium (Positive) Trichoderma	0.7935833915550878	false	Positive	Cladosporium (Positive) Trichoderma
0.7846153846153847	Positive	Harknessia (Positive) Solicoccozyma	8.900739749078555E-4	false	Positive	Harknessia (Positive) Solicoccozyma
0.6011141466794948	Positive	Psathyrella (Positive) Zopfiella	0.022986254768722854	false	Positive	Psathyrella (Positive) Zopfiella
0.30667465966319357	Positive	Candolleomyces (Positive) Solicoccozyma	0.2862163510197726	false	Positive	Candolleomyces (Positive) Solicoccozyma
0.6248628643663919	Positive	Alternaria (Positive) Harknessia	0.01688340997673991	false	Positive	Alternaria (Positive) Harknessia
0.9044240590257848	Positive	Dothiorella (Positive) Saccharata	8.931633740347218E-6	false	Positive	Dothiorella (Positive) Saccharata
-0.15918442297129204	Negative	Botryosphaeria (Negative) Filobasidium	0.5867381675670599	false	Negative	Botryosphaeria (Negative) Filobasidium
0.6571428571428571	Positive	Diplodia (Positive) Solicoccozyma	0.010661967747329804	false	Positive	Diplodia (Positive) Solicoccozyma
0.03893107085276252	Positive	Alternaria (Positive) Dothiorella	0.8948781050601285	false	Positive	Alternaria (Positive) Dothiorella
0.47252747252747257	Positive	Dendrostoma (Positive) Zopfiella	0.08796742461254232	false	Positive	Dendrostoma (Positive) Zopfiella
-0.11712885946328394	Negative	Dendrostoma (Negative) Psathyrella	0.6900602540777628	false	Negative	Dendrostoma (Negative) Psathyrella
-0.321799581067544	Negative	Coprinopsis (Negative) Robillarda	0.2618708208738422	false	Negative	Coprinopsis (Negative) Robillarda
0.7136187552218337	Positive	Botryosphaeria (Positive) Sticta	0.0041555514339982145	false	Positive	Botryosphaeria (Positive) Sticta
0.2175824175824176	Positive	Diaporthe (Positive) Fusarium	0.4549193731700327	false	Positive	Diaporthe (Positive) Fusarium
-0.09588234919101309	Negative	Filobasidium (Negative) Trichoderma	0.7443769187732996	false	Negative	Filobasidium (Negative) Trichoderma
0.4779735682819384	Positive	Alternaria (Positive) Trichoderma	0.08386843557655241	false	Positive	Alternaria (Positive) Trichoderma
0.06862635163075163	Positive	Dothiorella (Positive) Zopfiella	0.8156763004119474	false	Positive	Dothiorella (Positive) Zopfiella
-0.47384501741508317	Negative	Dothiorella (Negative) Psathyrella	0.08696319499903787	false	Negative	Dothiorella (Negative) Psathyrella
0.5569878323311913	Positive	Candolleomyces (Positive) Coprinopsis	0.038543183130777495	false	Positive	Candolleomyces (Positive) Coprinopsis
0.6823419894675914	Positive	Lasiodiplodia (Positive) Sticta	0.007174292552402451	false	Positive	Lasiodiplodia (Positive) Sticta
0.7494505494505495	Positive	Dendrostoma (Positive) Diaporthe	0.0020301455491006457	false	Positive	Dendrostoma (Positive) Diaporthe
-0.4228040533355747	Negative	Botryosphaeria (Negative) Candolleomyces	0.13201954456410986	false	Negative	Botryosphaeria (Negative) Candolleomyces
0.600842574440799	Positive	Coprinopsis (Positive) Fusarium	0.02306446944783932	false	Positive	Coprinopsis (Positive) Fusarium
0.3318681318681319	Positive	Cladosporium (Positive) Solicoccozyma	0.24637718314961166	false	Positive	Cladosporium (Positive) Solicoccozyma
0.3782263119550821	Positive	Dendrostoma (Positive) Lasiodiplodia	0.18238901263457638	false	Positive	Dendrostoma (Positive) Lasiodiplodia
0.49835645333536405	Positive	Saccharata (Positive) Trichoderma	0.06971660869724118	false	Positive	Saccharata (Positive) Trichoderma
0.39383962225909913	Positive	Fusarium (Positive) Trichoderma	0.16352638888533316	false	Positive	Fusarium (Positive) Trichoderma
0.9170205237216018	Positive	Dothiorella (Positive) Lasiodiplodia	3.933780569150313E-6	false	Positive	Dothiorella (Positive) Lasiodiplodia
0.380639845858409	Positive	Botryosphaeria (Positive) Robillarda	0.17938574946694938	false	Positive	Botryosphaeria (Positive) Robillarda
0.3397391908327048	Positive	Alternaria (Positive) Botryosphaeria	0.2346627256619604	false	Positive	Alternaria (Positive) Botryosphaeria
0.7890109890109891	Positive	Fusarium (Positive) Solicoccozyma	7.946144116544928E-4	false	Positive	Fusarium (Positive) Solicoccozyma
0.5698573305313223	Positive	Robillarda (Positive) Trichoderma	0.033380653401401915	false	Positive	Robillarda (Positive) Trichoderma
-0.45282271695010123	Negative	Coprinopsis (Negative) Saccharata	0.10396646278205354	false	Negative	Coprinopsis (Negative) Saccharata
0.6511513068768753	Positive	Diaporthe (Positive) Saccharata	0.011656037591701	false	Positive	Diaporthe (Positive) Saccharata
0.6570742598733555	Positive	Filobasidium (Positive) Solicoccozyma	0.010672966365729094	false	Positive	Filobasidium (Positive) Solicoccozyma
0.6072610935391698	Positive	Alternaria (Positive) Solicoccozyma	0.021268685923335477	false	Positive	Alternaria (Positive) Solicoccozyma
0.8505494505494505	Positive	Dendrostoma (Positive) Diplodia	1.156561589098896E-4	false	Positive	Dendrostoma (Positive) Diplodia
0.2866263899536212	Positive	Botryosphaeria (Positive) Fusarium	0.3204554648860527	false	Positive	Botryosphaeria (Positive) Fusarium
0.33530166139205636	Positive	Coprinopsis (Positive) Dendrostoma	0.2412241663668673	false	Positive	Coprinopsis (Positive) Dendrostoma
0.574014049908301	Positive	Lasiodiplodia (Positive) Robillarda	0.03182835085418707	false	Positive	Lasiodiplodia (Positive) Robillarda
0.3230769230769231	Positive	Diaporthe (Positive) Zopfiella	0.25987361950878973	false	Positive	Diaporthe (Positive) Zopfiella
-0.37348636319424494	Negative	Diaporthe (Negative) Psathyrella	0.1883808039752918	false	Negative	Diaporthe (Negative) Psathyrella
0.03555775054617749	Positive	Saccharata (Positive) Solicoccozyma	0.9039465865369538	false	Positive	Saccharata (Positive) Solicoccozyma
0.22953536551670975	Positive	Cladosporium (Positive) Coprinopsis	0.42988022626445666	false	Positive	Cladosporium (Positive) Coprinopsis
0.4884491404554191	Positive	Solicoccozyma (Positive) Trichoderma	0.07636451430193478	false	Positive	Solicoccozyma (Positive) Trichoderma
0.27935014040445716	Positive	Alternaria (Positive) Coprinopsis	0.3334315125271323	false	Positive	Alternaria (Positive) Coprinopsis
0.6474344516407581	Positive	Diaporthe (Positive) Lasiodiplodia	0.0123075184095029	false	Positive	Diaporthe (Positive) Lasiodiplodia
0.9252747252747253	Positive	Dendrostoma (Positive) Harknessia	2.1365703496108153E-6	false	Positive	Dendrostoma (Positive) Harknessia
0.14852288356963575	Positive	Coprinopsis (Positive) Zopfiella	0.612340366632218	false	Positive	Coprinopsis (Positive) Zopfiella
0.41409498231429964	Positive	Coprinopsis (Positive) Psathyrella	0.1410245346213945	false	Positive	Coprinopsis (Positive) Psathyrella
0.7381328124667327	Positive	Diplodia (Positive) Sticta	0.002576096733029756	false	Positive	Diplodia (Positive) Sticta
0.10468640750524646	Positive	Diplodia (Positive) Filobasidium	0.7217193032343839	false	Positive	Diplodia (Positive) Filobasidium
-0.26548932463998876	Negative	Psathyrella (Negative) Trichoderma	0.35894824897832955	false	Negative	Psathyrella (Negative) Trichoderma
-0.03375520081128085	Negative	Coprinopsis (Negative) Diaporthe	0.9087969053062308	false	Negative	Coprinopsis (Negative) Diaporthe
-0.660800788392917	Negative	Candolleomyces (Negative) Sticta	0.010087987199956166	false	Negative	Candolleomyces (Negative) Sticta
0.5576310322715639	Positive	Botryosphaeria (Positive) Saccharata	0.038272029476870674	false	Positive	Botryosphaeria (Positive) Saccharata
0.407183019675793	Positive	Dendrostoma (Positive) Dothiorella	0.14845622358622107	false	Positive	Dendrostoma (Positive) Dothiorella
-0.5011714595006315	Negative	Coprinopsis (Negative) Lasiodiplodia	0.06790541347828641	false	Negative	Coprinopsis (Negative) Lasiodiplodia
0.6879120879120879	Positive	Diaporthe (Positive) Diplodia	0.006540042491841914	false	Positive	Diaporthe (Positive) Diplodia
0.8796406015029841	Positive	Lasiodiplodia (Positive) Saccharata	3.3700776350862265E-5	false	Positive	Lasiodiplodia (Positive) Saccharata
0.758986680597189	Positive	Botryosphaeria (Positive) Dendrostoma	0.0016452051270625186	false	Positive	Botryosphaeria (Positive) Dendrostoma
0.3778603935709303	Positive	Dothiorella (Positive) Trichoderma	0.18284714658810777	false	Positive	Dothiorella (Positive) Trichoderma
0.6314677092908785	Positive	Candolleomyces (Positive) Filobasidium	0.01542911349497888	false	Positive	Candolleomyces (Positive) Filobasidium
0.6380641924868088	Positive	Dendrostoma (Positive) Trichoderma	0.014073930503519797	false	Positive	Dendrostoma (Positive) Trichoderma
0.6121640390816915	Positive	Harknessia (Positive) Sticta	0.019969591544167845	false	Positive	Harknessia (Positive) Sticta
0.2790804966317233	Positive	Dothiorella (Positive) Harknessia	0.3339179529504379	false	Positive	Dothiorella (Positive) Harknessia
-0.01978021978021978	Negative	Robillarda (Negative) Solicoccozyma	0.9464892274080114	false	Negative	Robillarda (Negative) Solicoccozyma
0.786604453834016	Positive	Saccharata (Positive) Sticta	8.458027228455243E-4	false	Positive	Saccharata (Positive) Sticta
0.2828772454962329	Positive	Psathyrella (Positive) Solicoccozyma	0.3271052046193287	false	Positive	Psathyrella (Positive) Solicoccozyma
0.2767926466525029	Positive	Coprinopsis (Positive) Diplodia	0.33806122750586765	false	Positive	Coprinopsis (Positive) Diplodia
0.07796237806738496	Positive	Botryosphaeria (Positive) Zopfiella	0.7910758286699581	false	Positive	Botryosphaeria (Positive) Zopfiella
-0.502645843742681	Negative	Botryosphaeria (Negative) Psathyrella	0.06697029330270386	false	Negative	Botryosphaeria (Negative) Psathyrella
-0.36171324073456135	Negative	Filobasidium (Negative) Sticta	0.20380303876536368	false	Negative	Filobasidium (Negative) Sticta
0.12967032967032965	Positive	Diplodia (Positive) Robillarda	0.658619276321178	false	Positive	Diplodia (Positive) Robillarda
-0.31884428901490747	Negative	Candolleomyces (Negative) Robillarda	0.26652677817366605	false	Negative	Candolleomyces (Negative) Robillarda
0.681024302529804	Positive	Botryosphaeria (Positive) Diaporthe	0.007331086042469755	false	Positive	Botryosphaeria (Positive) Diaporthe
0.1701683429938276	Positive	Cladosporium (Positive) Sticta	0.5608242339310869	false	Positive	Cladosporium (Positive) Sticta
0.7098901098901099	Positive	Dendrostoma (Positive) Solicoccozyma	0.004450741418764225	false	Positive	Dendrostoma (Positive) Solicoccozyma
0.14477907420938343	Positive	Cladosporium (Positive) Filobasidium	0.6214310087916477	false	Positive	Cladosporium (Positive) Filobasidium
0.33591672902677655	Positive	Fusarium (Positive) Sticta	0.2403080909838493	false	Positive	Fusarium (Positive) Sticta
0.36095309282695687	Positive	Botryosphaeria (Positive) Lasiodiplodia	0.20482535519904288	false	Positive	Botryosphaeria (Positive) Lasiodiplodia
0.46424670556798836	Positive	Diaporthe (Positive) Trichoderma	0.0944651904985382	false	Positive	Diaporthe (Positive) Trichoderma
0.17699288309332584	Positive	Alternaria (Positive) Sticta	0.5449706576826083	false	Positive	Alternaria (Positive) Sticta
0.20444977310879564	Positive	Candolleomyces (Positive) Fusarium	0.4832277694122664	false	Positive	Candolleomyces (Positive) Fusarium
0.6483516483516484	Positive	Diplodia (Positive) Fusarium	0.012144222573105724	false	Positive	Diplodia (Positive) Fusarium
0.31774964557486896	Positive	Alternaria (Positive) Filobasidium	0.26826381217539613	false	Positive	Alternaria (Positive) Filobasidium
0.1016590101002087	Positive	Sticta (Positive) Zopfiella	0.7294875461394512	false	Positive	Sticta (Positive) Zopfiella
0.27472527472527475	Positive	Harknessia (Positive) Robillarda	0.34182974371948127	false	Positive	Harknessia (Positive) Robillarda
0.25681724539844464	Positive	Botryosphaeria (Positive) Cladosporium	0.375438283498023	false	Positive	Botryosphaeria (Positive) Cladosporium
0.19578773795321897	Positive	Lasiodiplodia (Positive) Zopfiella	0.5023418085561151	false	Positive	Lasiodiplodia (Positive) Zopfiella
-0.36913583036771336	Negative	Lasiodiplodia (Negative) Psathyrella	0.19398993719787316	false	Negative	Lasiodiplodia (Negative) Psathyrella
0.6087912087912088	Positive	Diaporthe (Positive) Harknessia	0.02085661601722322	false	Positive	Diaporthe (Positive) Harknessia
0.6702507009270076	Positive	Diaporthe (Positive) Dothiorella	0.00871506238100215	false	Positive	Diaporthe (Positive) Dothiorella
0.28264617199601244	Positive	Alternaria (Positive) Candolleomyces	0.3275175780564079	false	Positive	Alternaria (Positive) Candolleomyces
-0.018300360434867102	Negative	Dothiorella (Negative) Solicoccozyma	0.950487992949975	false	Negative	Dothiorella (Negative) Solicoccozyma
0.35138657838985177	Positive	Solicoccozyma (Positive) Sticta	0.21796782783585084	false	Positive	Solicoccozyma (Positive) Sticta
0.07252747252747253	Positive	Cladosporium (Positive) Robillarda	0.8053763135410923	false	Positive	Cladosporium (Positive) Robillarda
0.8071399141093974	Positive	Botryosphaeria (Positive) Diplodia	4.834567830885416E-4	false	Positive	Botryosphaeria (Positive) Diplodia
-0.4187456300209859	Negative	Filobasidium (Negative) Robillarda	0.13616637809171134	false	Negative	Filobasidium (Negative) Robillarda
0.4089141312810412	Positive	Diplodia (Positive) Saccharata	0.14657111112554194	false	Positive	Diplodia (Positive) Saccharata
-0.44034020402636836	Negative	Coprinopsis (Negative) Dothiorella	0.11507900064340633	false	Negative	Coprinopsis (Negative) Dothiorella
0.6013900005620543	Positive	Filobasidium (Positive) Fusarium	0.022907011357937435	false	Positive	Filobasidium (Positive) Fusarium
0.477073504799436	Positive	Coprinopsis (Positive) Harknessia	0.08453642927335608	false	Positive	Coprinopsis (Positive) Harknessia
0.3230769230769231	Positive	Cladosporium (Positive) Fusarium	0.25987361950878973	false	Positive	Cladosporium (Positive) Fusarium
-0.6435832505164004	Negative	Candolleomyces (Negative) Saccharata	0.013011626369767446	false	Negative	Candolleomyces (Negative) Saccharata
0.4375757391269852	Positive	Robillarda (Positive) Sticta	0.11764539525436395	false	Positive	Robillarda (Positive) Sticta
0.01689617784704378	Positive	Coprinopsis (Positive) Trichoderma	0.9542832735411286	false	Positive	Coprinopsis (Positive) Trichoderma
-0.1436016263502255	Negative	Candolleomyces (Negative) Dendrostoma	0.6243005471873406	false	Negative	Candolleomyces (Negative) Dendrostoma
0.2992301040627792	Positive	Alternaria (Positive) Robillarda	0.29866966362857994	false	Positive	Alternaria (Positive) Robillarda
0.24890425382324244	Positive	Harknessia (Positive) Saccharata	0.390832240257158	false	Positive	Harknessia (Positive) Saccharata
0.5457366464716947	Positive	Botryosphaeria (Positive) Harknessia	0.043518478291338265	false	Positive	Botryosphaeria (Positive) Harknessia
0.4950498045156275	Positive	Alternaria (Positive) Fusarium	0.07188773497236514	false	Positive	Alternaria (Positive) Fusarium
-0.07252747252747253	Negative	Fusarium (Negative) Robillarda	0.8053763135410923	false	Negative	Fusarium (Negative) Robillarda
0.3758241758241759	Positive	Diaporthe (Positive) Solicoccozyma	0.185410028697123	false	Positive	Diaporthe (Positive) Solicoccozyma
0.5000014240125542	Positive	Botryosphaeria (Positive) Dothiorella	0.06865409926928769	false	Positive	Botryosphaeria (Positive) Dothiorella
-0.6666683575531689	Negative	Filobasidium (Negative) Saccharata	0.009217340829429588	false	Negative	Filobasidium (Negative) Saccharata
0.3042407337928507	Positive	Candolleomyces (Positive) Zopfiella	0.2902538082745788	false	Positive	Candolleomyces (Positive) Zopfiella
0.7856187150893569	Positive	Candolleomyces (Positive) Psathyrella	8.675167234068006E-4	false	Positive	Candolleomyces (Positive) Psathyrella
0.7786199653802115	Positive	Coprinopsis (Positive) Solicoccozyma	0.0010348398032747573	false	Positive	Coprinopsis (Positive) Solicoccozyma
0.4461538461538462	Positive	Harknessia (Positive) Zopfiella	0.10980712780122508	false	Positive	Harknessia (Positive) Zopfiella
-0.013259870882635917	Negative	Harknessia (Negative) Psathyrella	0.9641156315782743	false	Negative	Harknessia (Negative) Psathyrella
0.7196502454463037	Positive	Botryosphaeria (Positive) Trichoderma	0.003710774043643606	false	Positive	Botryosphaeria (Positive) Trichoderma
-0.21418547659016693	Negative	Candolleomyces (Negative) Diaporthe	0.4621627701427642	false	Negative	Candolleomyces (Negative) Diaporthe
0.2571428571428571	Positive	Diplodia (Positive) Zopfiella	0.3748119038799703	false	Positive	Diplodia (Positive) Zopfiella
-0.30055707333974746	Negative	Diplodia (Negative) Psathyrella	0.29642726227762506	false	Negative	Diplodia (Negative) Psathyrella
-0.5711111111111109	Negative	Psathyrella (Negative) Sticta	0.03290665211954628	false	Negative	Psathyrella (Negative) Sticta
0.09778381400198811	Positive	Cladosporium (Positive) Saccharata	0.7394664408416683	false	Positive	Cladosporium (Positive) Saccharata
0.34262854141813315	Positive	Harknessia (Positive) Lasiodiplodia	0.23045006637631998	false	Positive	Harknessia (Positive) Lasiodiplodia
0.1648254075614519	Positive	Dendrostoma (Positive) Filobasidium	0.5733694198929802	false	Positive	Dendrostoma (Positive) Filobasidium
-0.14223100218470996	Negative	Fusarium (Negative) Saccharata	0.6276471152908258	false	Negative	Fusarium (Negative) Saccharata
-0.4853866040708954	Negative	Candolleomyces (Negative) Lasiodiplodia	0.0785071442738097	false	Negative	Candolleomyces (Negative) Lasiodiplodia
0.643103737807842	Positive	Dendrostoma (Positive) Sticta	0.013101407738625738	false	Positive	Dendrostoma (Positive) Sticta
0.6307692307692307	Positive	Cladosporium (Positive) Dendrostoma	0.01557822427277127	false	Positive	Cladosporium (Positive) Dendrostoma
0.033372083928707406	Positive	Alternaria (Positive) Saccharata	0.9098281861513847	false	Positive	Alternaria (Positive) Saccharata
0.3764153220341368	Positive	Lasiodiplodia (Positive) Trichoderma	0.18466362199357914	false	Positive	Lasiodiplodia (Positive) Trichoderma
-0.04624459153651331	Negative	Candolleomyces (Negative) Cladosporium	0.8752594974229836	false	Negative	Candolleomyces (Negative) Cladosporium
0.7577507807433013	Positive	Sticta (Positive) Trichoderma	0.0016915283087509502	false	Positive	Sticta (Positive) Trichoderma
0.24250981178296438	Positive	Diplodia (Positive) Lasiodiplodia	0.4035108598555285	false	Positive	Diplodia (Positive) Lasiodiplodia
0.6644668487276423	Positive	Alternaria (Positive) Dendrostoma	0.009536917578043135	false	Positive	Alternaria (Positive) Dendrostoma
0.44025813496876215	Positive	Botryosphaeria (Positive) Solicoccozyma	0.11515463446157737	false	Positive	Botryosphaeria (Positive) Solicoccozyma
-0.27259969747839424	Negative	Candolleomyces (Negative) Diplodia	0.345728571157881	false	Negative	Candolleomyces (Negative) Diplodia
0.5032967032967033	Positive	Cladosporium (Positive) Zopfiella	0.06656042759911303	false	Positive	Cladosporium (Positive) Zopfiella
0.026519741765271835	Positive	Cladosporium (Positive) Psathyrella	0.9282943084975372	false	Positive	Cladosporium (Positive) Psathyrella
0.6463614072506717	Positive	Dothiorella (Positive) Sticta	0.012500691843799946	false	Positive	Dothiorella (Positive) Sticta
0.45780603828203514	Positive	Robillarda (Positive) Saccharata	0.09974432879481614	false	Positive	Robillarda (Positive) Saccharata
-0.21215793412217465	Negative	Psathyrella (Negative) Robillarda	0.4665126168746394	false	Negative	Psathyrella (Negative) Robillarda
-0.6781087714856795	Negative	Dothiorella (Negative) Filobasidium	0.007687457640076315	false	Negative	Dothiorella (Negative) Filobasidium
0.6043956043956044	Positive	Cladosporium (Positive) Diaporthe	0.022056861754616085	false	Positive	Cladosporium (Positive) Diaporthe
0.20937281501049296	Positive	Filobasidium (Positive) Zopfiella	0.4725197427849962	false	Positive	Filobasidium (Positive) Zopfiella
0.5677666038774694	Positive	Filobasidium (Positive) Psathyrella	0.034182297855768394	false	Positive	Filobasidium (Positive) Psathyrella
0.7656770309841704	Positive	Alternaria (Positive) Zopfiella	0.0014116277732486064	false	Positive	Alternaria (Positive) Zopfiella
0.29867549021998735	Positive	Alternaria (Positive) Psathyrella	0.29960979189956677	false	Positive	Alternaria (Positive) Psathyrella
0.03756530999097279	Positive	Botryosphaeria (Positive) Coprinopsis	0.8985482952764684	false	Positive	Botryosphaeria (Positive) Coprinopsis
0.3186813186813187	Positive	Dendrostoma (Positive) Robillarda	0.2667849608113615	false	Positive	Dendrostoma (Positive) Robillarda
0.1446159428063549	Positive	Cladosporium (Positive) Lasiodiplodia	0.6218282764495979	false	Positive	Cladosporium (Positive) Lasiodiplodia
0.5192522394030581	Positive	Alternaria (Positive) Diaporthe	0.057063989968257324	false	Positive	Alternaria (Positive) Diaporthe
0.7494505494505495	Positive	Diplodia (Positive) Harknessia	0.0020301455491006457	false	Positive	Diplodia (Positive) Harknessia
0.5032599119588452	Positive	Dothiorella (Positive) Robillarda	0.0665835483234683	false	Positive	Dothiorella (Positive) Robillarda
-0.006667078227408279	Negative	Saccharata (Negative) Zopfiella	0.9819533478740454	false	Negative	Saccharata (Negative) Zopfiella
-0.6617817058005057	Negative	Filobasidium (Negative) Lasiodiplodia	0.009938195307048663	false	Negative	Filobasidium (Negative) Lasiodiplodia
0.5120879120879122	Positive	Fusarium (Positive) Zopfiella	0.06119848615645835	false	Positive	Fusarium (Positive) Zopfiella
0.3580165138311697	Positive	Fusarium (Positive) Psathyrella	0.2088050912591336	false	Positive	Fusarium (Positive) Psathyrella
0.16259360064196446	Positive	Alternaria (Positive) Lasiodiplodia	0.5786436354974472	false	Positive	Alternaria (Positive) Lasiodiplodia
0.0	Negative	Lasiodiplodia (Negative) Solicoccozyma	1.0	false	Negative	Lasiodiplodia (Negative) Solicoccozyma
0.6791208791208792	Positive	Dendrostoma (Positive) Fusarium	0.007562257031145479	false	Positive	Dendrostoma (Positive) Fusarium

[truncated: 9 more sheets: S35, S36, S37, S38, S39, S40, S41, S42, S43]
